# Supplementary material for: B(C6F5)3-catalyzed tandem protonation/deuteration and reduction of in situ-formed enamines
Source: Royal Society of Chemistry journal article supplement (doi:10.1039/d1ob00316j), 2021-01-01

## Supporting Information

### **B(C<sub>6</sub>F<sub>5</sub>)<sub>3</sub>-Catalyzed Tandem Protonation/Deuteration and Reduction of in situ-formed Enamines**

Rongpei Wu, Ke Gao\*

*Hubei International Scientific and Technological Cooperation Base of Pesticide and Green Synthesis, Key Laboratory of Pesticide & Chemical Biology, Ministry of Education, College of Chemistry, Central China Normal University, 152 Luoyu Road, Wuhan, Hubei 430079, P. R. China.*

#### **Table of Contents**

|                                                               |     |
|---------------------------------------------------------------|-----|
| 1. General Information.....                                   | S1  |
| 2. General Procedure and Spectral Data of Aldehydes.....      | S1  |
| 3. General Procedure and Spectral Data of Products.....       | S4  |
| 3.1 General Procedure for Synthesis of Amines.....            | S4  |
| 3.2 General Procedure for $\beta$ -Deuteration of Amines..... | S16 |
| 3.3 General Procedure for Control Experiments.....            | S23 |
| 4. References.....                                            | S26 |
| 5. <sup>1</sup> H and <sup>13</sup> C NMR Spectra.....        | S28 |

## 1. General Information.

Unless otherwise noted, materials were purchased from commercial suppliers and used without further purification. Flash column chromatography was performed using 200–300 mesh silica gel or basic aluminum oxide.  $^1\text{H}$  and  $^{13}\text{C}$  NMR spectra were recorded on a VARIAN-400 (400 MHz) or Bruker AV-400 (400 MHz) NMR spectrometer. Chemical shifts ( $\delta$ ) are reported in ppm from the resonance of tetramethyl silane as the internal standard (TMS: 0.00 ppm). Data are reported as follows: chemical shift, multiplicity (s, singlet; d, doublet; t, triplet; q, quartet; m, multiplet), coupling constants (herz) and integration. High-resolution mass spectra were obtained with a MICROTOF-10454 Premier LC HR mass spectrometer.

**Materials.** Unless otherwise noted, commercial reagents were purchased from Adamas, Energy-Chemical and other commercial suppliers and were used as received. (*E*)-1-Styrylpyrrolidine, <sup>1</sup> 2-(*o*-Tolyl)acetaldehyde (**1b**), 2-(*p*-Tolyl)acetaldehyde (**1d**),<sup>2</sup> 2-(*m*-Tolyl)acetaldehyde (**1c**), 2-(Naphthalen-1-yl)acetaldehyde (**1j**),<sup>3</sup> and 2-(4-Hydroxyphenyl)acetaldehyde (**1h**)<sup>4</sup> were prepared according to the literature procedure.

## 2. General Procedure and Spectral Data of Aldehydes.

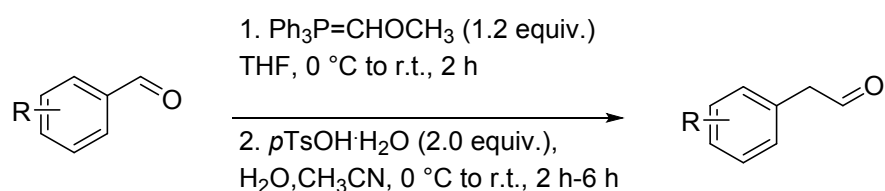

To a solution of (methoxymethyl)triphenylphosphonium chloride (1.54 g, 4.5 mmol) in THF (6 mL) were added sodium bis(trimethylsilyl)amide (2.0 M in THF, 2.25 mL, 4.5 mmol) dropwise at 0 °C. The resulting mixture was stirred at 0 °C for 0.5 h. A solution of arylacetylaldehyde (3.0 mmol) in THF (6 mL) was added dropwise at 0 °C and stirred at room temperature for 2 h. The solvent was removed under vacuum. To the crude mixture were added  $\text{H}_2\text{O}$  (1.5 mL), and  $\text{CH}_3\text{CN}$  (6 mL). Then,  $p\text{TsOH}\cdot\text{H}_2\text{O}$  (1.1413 g, 6.0 mmol) was added at 0 °C, and the resulting mixture was stirred at room temperature for 2-6 h. Then the resulting mixture was concentrated under reduced pressure and then purified by flash column chromatography.<sup>5</sup>

### 2-(4-Methoxyphenyl)acetaldehyde (1f)

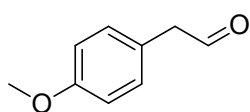

The typical procedure was applied to 2-(4-methoxyphenyl)acetaldehyde (408.5 mg, 3.0 mmol) for 6 h. Silica gel chromatography (eluent: PE/EtOAc = 20/1) of the crude product afforded the title compound as a yellow oil (239.9 mg, 53 %);  $R_f$  = 0.20 (PE/EtOAc = 10/1);  $^1\text{H NMR}$  (400 MHz,  $\text{CDCl}_3$ )  $\delta$  9.70 (t,  $J$  = 2.8 Hz, 1H), 7.12 (d,  $J$  = 7.9 Hz, 2H), 6.90 (d,  $J$  = 8.2 Hz, 2H), 3.79 (s, 3H), 3.61 (t,  $J$  = 1.9 Hz, 2H);  $^{13}\text{C NMR}$  (100 MHz,  $\text{CDCl}_3$ )  $\delta$  199.6, 158.8, 130.6, 123.6, 114.3, 55.1, 49.5. The physical and spectral data were consistent with those previously reported.<sup>6</sup>

### 2-(4-(*tert*-Butyl)phenyl)acetaldehyde (1e)

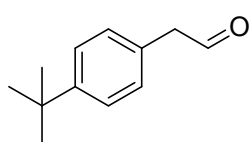

The typical procedure was applied to 2-(4-*tert*-butylphenyl)acetaldehyde (444.6 mg, 3.0 mmol) for 3 h. Silica gel chromatography (eluent: PE/EtOAc = 50/1) of the crude product afforded the title compound as a yellow oil (116.3 mg, 22 %);  $R_f$  = 0.80 (PE/EtOAc = 10/1);  $^1\text{H NMR}$  (400 MHz,  $\text{CDCl}_3$ )  $\delta$  9.75 (t,  $J$  = 2.4 Hz, 1H), 7.40 (d,  $J$  = 8.1 Hz, 2H), 7.16 (d,  $J$  = 8.1 Hz, 2H), 3.68-3.66 (m, 2H), 1.32 (s, 9H);  $^{13}\text{C NMR}$  (100 MHz,  $\text{CDCl}_3$ )  $\delta$  199.7, 150.4, 129.3, 128.8, 126.0, 50.1, 34.5, 31.3. The physical and spectral data were consistent with those previously reported.<sup>6</sup>

### 2-(4-Bromophenyl)acetaldehyde (1g)

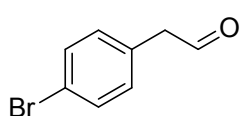

The typical procedure was applied to 2-(4-bromophenyl)acetaldehyde (555.1 mg, 3.0 mmol) for 2 h. Silica gel chromatography (eluent: PE/EtOAc = 30/1) of the crude product afforded the title compound as a yellow solid (265.5 mg, 44 %);  $R_f$  = 0.20 (PE/EtOAc = 10/1);  $^1\text{H NMR}$  (400 MHz,  $\text{CDCl}_3$ )  $\delta$  9.73 (t,  $J$  = 1.9 Hz, 1H), 7.49 (d,  $J$  = 7.9 Hz, 2H), 7.09 (d,  $J$  = 8.0 Hz, 2H), 3.67 (d,  $J$  = 2.1 Hz, 2H);  $^{13}\text{C NMR}$  (100 MHz,  $\text{CDCl}_3$ )  $\delta$  198.6, 132.1, 131.3, 130.7, 121.5, 49.8. The physical and spectral data were consistent with those previously reported.<sup>7</sup>

### 2-Mesitylacetaldehyde (1i)

The typical procedure was applied to 2-mesitylacetaldehyde (486.7 mg, 3.0 mmol) for 3 h. Silica gel chromatography (eluent: PE/EtOAc = 50/1) of the crude product afforded the title

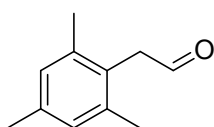

compound as a white solid (207.6 mg, 43 %);  $R_f = 0.80$  (PE/EtOAc = 10/1);  $^1\text{H NMR}$  (400 MHz,  $\text{CDCl}_3$ )  $\delta$  9.66 (t,  $J = 2.8$  Hz, 1H), 6.91 (s, 2H), 2.28 (d,  $J = 2.4$  Hz, 3H), 2.25 (s, 6H);  $^{13}\text{C NMR}$  (100 MHz,  $\text{CDCl}_3$ )  $\delta$  199.1, 137.2, 137.0, 129.2, 126.2, 44.8, 20.9, 20.4. The physical and spectral data were consistent with those previously reported.<sup>8</sup>

## 2-(1-Tosyl-1*H*-indol-3-yl)acetaldehyde (1p)

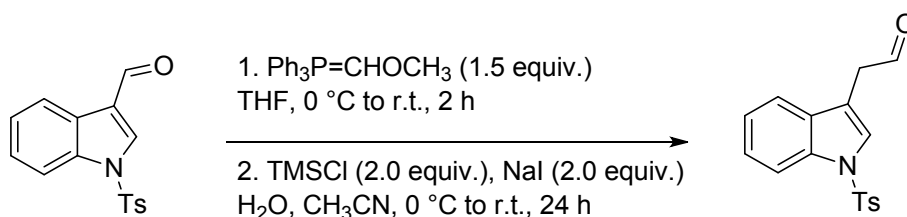

1-Tosyl-1*H*-indole-3-carbaldehyde was synthesized according to the literature.<sup>9</sup> To a solution of (methoxymethyl)triphenylphosphonium chloride (1.5426 g, 4.5 mmol) in THF (6 mL) was added sodium bis(trimethylsilyl)amide (2.0 M in THF, 2.25 mL, 4.5 mmol) dropwise at 0 °C. The resulting mixture was stirred at 0 °C for 0.5 h. A solution of 1-tosyl-1*H*-indole-3-carbaldehyde (0.8980 g, 3.0 mmol) in THF (6 mL) was added dropwise at 0 °C, and stirred at room temperature for 2 h. The solvent was removed under vacuum. To the crude mixture was added  $\text{H}_2\text{O}$  (1.5 mL), and  $\text{CH}_3\text{CN}$  (6 mL). Then, TMSCl (0.76 mL, 6 mmol, 2.0 equiv.) and NaI (0.8993 g, 6 mmol, 2.0 equiv.) was added at 0 °C, and the resulting mixture was stirred at room temperature for 24 h. Then the resulting mixture was concentrated under reduced pressure and then purified by flash column chromatography (eluent: PE/EtOAc = 10/1) to afford the title compound as a yellow solid (336.5 mg, 36 %).<sup>5</sup>

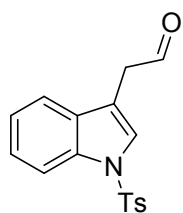

$R_f = 0.30$  (PE/EtOAc = 4/1);  $^1\text{H NMR}$  (400 MHz,  $\text{CDCl}_3$ )  $\delta$  9.74 (q,  $J = 2.5$  Hz, 1H), 8.01 (d,  $J = 8.4$  Hz, 1H), 7.79-7.77 (m, 2H), 7.58 (s, 1H), 7.42 (d,  $J = 7.4$  Hz, 1H), 7.36 (t,  $J = 7.8$  Hz, 1H), 7.27-7.22 (m, 3H), 3.75 (s, 2H), 2.35 (s, 3H);  $^{13}\text{C NMR}$  (100 MHz,  $\text{CDCl}_3$ )  $\delta$  197.9, 145.1, 135.2, 135.1, 130.4, 130.0, 126.9, 125.2, 124.0, 123.4, 119.2, 113.8, 112.9, 39.9, 21.6. The physical and spectral data were consistent with those previously reported.<sup>10</sup>

### 3. General Procedure and Spectral Data of Products.

#### 3.1 General Procedure for Synthesis of Tertiary Amines.

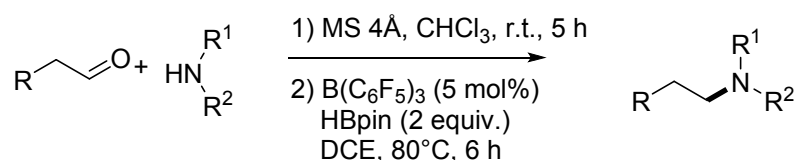

In a Schlenk tube were placed secondary amine (0.24 mmol, 1.2 equiv.), arylacetaldehyde (0.2 mmol), MS 4Å (135 mg) and CH<sub>3</sub>Cl (0.4 mL). The resulting mixture was stirred at room temperature for 5 h (0 °C, 0.5 h for morpholine), and then filtered and the solvent was concentrated under reduced pressure. The corresponding enamine was directly used without further purification. To a Schlenk tube were placed the crude enamine, HBpin (51.2 mg, 0.4 mmol, 2.0 equiv.), B(C<sub>6</sub>F<sub>5</sub>)<sub>3</sub> (5.1 mg, 0.01 mmol), and DCE (0.8 mL). The resulting mixture was stirred at 80 °C for 6 h, and then allowed to room temperature. The solution was concentrated *in vacuo* before purifying by column chromatography.

#### 1-Phenethylpyrrolidine (3aa)

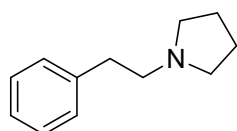

The typical procedure was applied to 2-phenylacetaldehyde (24.0 mg, 0.2 mmol) and pyrrolidine (17.1 mg, 0.24 mmol) for 6 h. Basic aluminum oxide chromatography (eluent: PE/EtOAc/MeOH = 100/10/1) of the crude product afforded the title compound as a colorless oil (29.1 mg, 83%);  $R_f = 0.3$  (PE/EtOAc/MeOH = 40/10/1); <sup>1</sup>H NMR (400 MHz, CDCl<sub>3</sub>)  $\delta$  7.29-7.24 (m, 2H), 7.21-7.17 (m, 3H), 2.92-2.88 (m, 2H), 2.81-2.77 (m, 2H), 2.71-2.68 (m, 4H), 1.89-1.82 (m, 4H); <sup>13</sup>C NMR (100 MHz, CDCl<sub>3</sub>)  $\delta$  140.5, 128.6, 128.3, 126.0, 58.4, 54.2, 35.8, 23.4. The physical and spectral data were consistent with those previously reported.<sup>11</sup>

#### 1-Phenethylpiperidine (3ab)

The typical procedure was applied to 2-phenylacetaldehyde (24.0 mg, 0.2 mmol) and piperidine (20.4 mg, 0.24 mmol) for 6 h. Basic aluminum oxide chromatography (eluent: PE/EtOAc/MeOH = 100/10/1) of the crude product afforded the title compound as a white solid

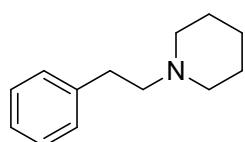

(30.0 mg, 79%);  $R_f = 0.4$  (PE/EtOAc/MeOH = 40/10/1);  $^1\text{H NMR}$  (400 MHz,  $\text{CDCl}_3$ )  $\delta$  7.39-7.34 (m, 2H), 7.30-7.26 (m, 3H), 2.92-2.88 (m, 2H), 2.66-2.62 (m, 2H), 2.56 (bs, 4H), 1.74-1.68 (m, 4H), 1.57-1.51 (m, 2H);

$^{13}\text{C NMR}$  (100 MHz,  $\text{CDCl}_3$ )  $\delta$  140.4, 128.6, 128.3, 125.9, 61.3, 54.4, 33.5, 25.8, 24.3. The physical and spectral data were consistent with those previously reported.<sup>11</sup>

#### 4-Phenethylmorpholine (3ac)

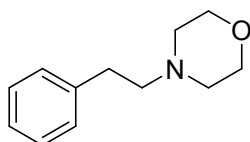

The typical procedure was applied to 2-phenylacetaldehyde (24.0 mg, 0.2 mmol) and morpholine (20.9 mg, 0.24 mmol) for 6 h. Basic aluminum oxide chromatography (eluent: PE/EtOAc/MeOH = 100/10/1) of the

crude product afforded the title compound as a white solid (34.2 mg, 89%);  $R_f = 0.5$  (PE/EtOAc/MeOH = 40/10/1);  $^1\text{H NMR}$  (400 MHz,  $\text{CDCl}_3$ )  $\delta$  7.31-7.27 (m, 2H), 7.22-7.19 (m, 3H), 3.75 (t,  $J = 4.7$  Hz, 4H), 2.83-2.79 (m, 2H), 2.60-2.58 (m, 2H), 2.54 (t,  $J = 4.8$  Hz, 4H);  $^{13}\text{C NMR}$  (100 MHz,  $\text{CDCl}_3$ )  $\delta$  140.0, 128.6, 128.3, 126.0, 66.9, 60.8, 53.6, 33.2. The physical and spectral data were consistent with those previously reported.<sup>11</sup>

#### 1-Phenethylindoline (3ad)

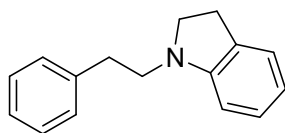

The typical procedure was applied to 2-phenylacetaldehyde (24.0 mg, 0.2 mmol) and indoline (28.6 mg, 0.24 mmol) for 6 h. Silica gel chromatography (eluent: PE/EtOAc = 80/1) of the crude product

afforded the title compound as a yellow oil (30.8 mg, 69%);  $R_f = 0.7$  (PE/EtOAc = 10/1);  $^1\text{H NMR}$  (400 MHz,  $\text{CDCl}_3$ )  $\delta$  7.37-7.27 (m, 5H), 7.15-7.09 (m, 2H), 6.70 (q,  $J = 7.3$  Hz, 1H), 6.54 (t,  $J = 7.3$  Hz, 1H), 3.47-3.35 (m, 4H), 3.02 (q,  $J = 7.9$  Hz, 2H), 2.94 (q,  $J = 7.5$  Hz, 2H);  $^{13}\text{C NMR}$  (100 MHz,  $\text{CDCl}_3$ )  $\delta$  152.1, 139.9, 130.0, 128.7, 128.5, 127.3, 126.2, 124.4, 117.4, 106.8, 53.0, 50.9, 33.5, 28.6. The physical and spectral data were consistent with those previously reported.<sup>12</sup>

#### 1-Phenethyl-1,2,3,4-tetrahydroquinoline (3ae) (Gram-scale)

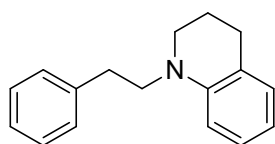

In a Schlenk tube were placed 1,2,3,4-tetrahydroquinoline (**2e**) (961.2 mg, 9.6 mmol, 1.2 equiv.), phenylacetaldehyde (127.9 mg, 8.0 mmol),

MS 4Å (5.4 g) and CH<sub>3</sub>Cl (16 mL). The resulting mixture was stirred at room temperature for 5 h, and then filtered and the solvent was concentrated under reduced pressure. The corresponding enamine was directly used without further purification. To a Schlenk tube was placed the crude enamine, HBpin (2.0476 g, 16 mmol, 2.0 equiv.), B(C<sub>6</sub>F<sub>5</sub>)<sub>3</sub> (204.8 mg, 0.4 mmol), and DCE (32 mL). The resulting mixture was stirred at 80 °C for 6 h, and then allowed to room temperature. The solution was concentrated in *vacuo* before purifying by column chromatography. Silica gel chromatography of the crude product afforded the title compound as a yellow oil (1.3217 g, 70%); *R<sub>f</sub>* = 0.8 (PE/EtOAc = 10/1); <sup>1</sup>H NMR (400 MHz, CDCl<sub>3</sub>) δ 7.35-7.32 (m, 2H), 7.27-7.25 (m, 3H), 7.11 (t, *J* = 7.8 Hz, 1H), 6.98 (d, *J* = 7.4 Hz, 1H), 6.69 (d, *J* = 8.2 Hz, 1H), 6.61 (t, *J* = 7.3 Hz, 1H), 3.51 (t, *J* = 7.8 Hz, 2H), 3.23 (t, *J* = 5.6 Hz, 2H), 2.90 (t, *J* = 7.7 Hz, 2H), 2.77 (t, *J* = 6.4 Hz, 2H), 1.93 (p, *J* = 5.9 Hz, 2H). <sup>13</sup>C NMR (100 MHz, CDCl<sub>3</sub>) δ 144.7, 139.9, 129.2, 128.8, 128.4, 127.1, 126.1, 122.3, 115.5, 110.3, 53.3, 49.5, 32.4, 28.1, 22.1. The physical and spectral data were consistent with those previously reported.<sup>13</sup>

### 2-Phenethyl-1,2,3,4-tetrahydroisoquinoline (3af)

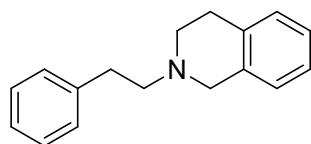

The typical procedure was applied to 2-phenylacetaldehyde (24.0 mg, 0.2 mmol) and 1,2,3,4-tetrahydroisoquinoline (32.0 mg, 0.24 mmol) for 6 h. Basic aluminum oxide chromatography (eluent: PE/EtOAc/MeOH = 100/10/1) of the crude product afforded the title compound as a yellow oil (27.9 mg, 59%); *R<sub>f</sub>* = 0.3 (PE/EtOAc/MeOH = 40/10/1); <sup>1</sup>H NMR (400 MHz, CDCl<sub>3</sub>) δ 7.25-7.11 (m, 5H), 7.07-7.01 (m, 3H), 6.98-6.94 (m, 1H), 3.65 (s, 2H), 2.87-2.82 (m, 4H), 2.77-2.66 (m, 4H). <sup>13</sup>C NMR (100 MHz, CDCl<sub>3</sub>) δ 140.3, 134.6, 134.2, 128.7, 128.6, 128.4, 126.6, 126.1, 126.0, 125.6, 60.3, 56.0, 50.9, 33.9, 29.0. The physical and spectral data were consistent with those previously reported.<sup>14</sup>

### *N*-Methyl-*N*-phenethylcyclohexanamine (3ag)

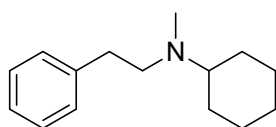

The typical procedure was applied to 2-phenylacetaldehyde (24.0 mg, 0.2 mmol) and *N*-methylcyclohexanamine (27.2 mg, 0.24 mmol) for 6 h. Basic aluminum oxide chromatography (eluent: PE/EtOAc/MeOH = 100/10/1) of the crude product afforded the title compound as a yellow oil (35.8 mg, 82%);

$R_f = 0.2$  (PE/EtOAc/MeOH = 40/10/1);  $^1\text{H NMR}$  (400 MHz,  $\text{CDCl}_3$ )  $\delta$  7.31-7.26 (m, 2H), 7.22-7.18 (m, 3H), 2.80-2.76 (m, 2H), 2.73-2.68 (m, 2H), 2.48-2.36 (m, 1H), 2.36 (s, 3H), 1.85-1.75 (m, 4H), 1.66-1.61 (m, 1H), 1.30-1.18 (m, 5H);  $^{13}\text{C NMR}$  (100 MHz,  $\text{CDCl}_3$ )  $\delta$  140.6, 128.7, 128.3, 125.9, 62.6, 55.8, 37.7, 34.5, 28.5, 26.3, 25.9. The physical and spectral data were consistent with those previously reported.<sup>15</sup>

### ***N,N*-Dibenzyl-2-phenylethanamine (3ah)**

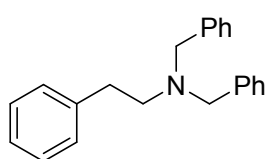

The typical procedure was applied to 2-phenylacetaldehyde (24.0 mg, 0.2 mmol) and dibenzylamine (47.3 mg, 0.24 mmol) for 6 h. Silica gel chromatography (eluent: PE/EtOAc = 50/1) of the crude product afforded the title compound as a yellow oil (41.1 mg, 68%);  $R_f = 0.7$  (PE/EtOAc = 10/1);  $^1\text{H NMR}$  (400 MHz,  $\text{CDCl}_3$ )  $\delta$  7.25-7.18 (m, 9H), 7.16-7.14 (m, 3H), 7.12-7.07 (m, 1H), 7.00 (d,  $J = 7.4$  Hz, 2H) 3.56 (s, 4H), 2.76-2.72 (m, 2H), 2.65-2.61 (m, 2H);  $^{13}\text{C NMR}$  (100 MHz,  $\text{CDCl}_3$ )  $\delta$  140.5, 139.7, 128.8, 128.7, 128.2, 128.1, 126.8, 125.8, 58.1, 55.1, 33.5. The physical and spectral data were consistent with those previously reported.<sup>16</sup>

### **2-Phenyl-*N,N*-bis(pyridin-2-ylmethyl)ethanamine (3ai)**

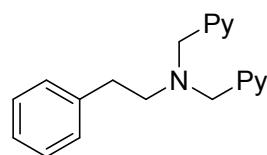

The typical procedure was applied to 2-phenylacetaldehyde (24.0 mg, 0.2 mmol) and bis(pyridin-2-ylmethyl)amine (47.8 mg, 0.24 mmol) for 6 h. Basic aluminum oxide chromatography (eluent: PE/EtOAc/MeOH = 100/10/1) of the crude product afforded the title compound as a yellow oil (41.9 mg, 69%);  $R_f = 0.2$  (PE/EtOAc/MeOH = 40/10/1);  $^1\text{H NMR}$  (400 MHz,  $\text{CDCl}_3$ )  $\delta$  8.51 (d,  $J = 4.5$  Hz, 2H), 7.58 (t,  $J = 7.6$  Hz, 2H), 7.38 (d,  $J = 7.9$  Hz, 2H), 7.26-7.22 (m, 2H), 7.19-7.18 (m, 1H), 7.14-7.09 (m, 4H), 3.89 (s, 4H), 2.87-2.81 (m, 4H);  $^{13}\text{C NMR}$  (100 MHz,  $\text{CDCl}_3$ )  $\delta$  159.6, 148.8, 140.3, 136.3, 128.8, 128.1, 125.8, 122.7, 121.8, 60.2, 56.0, 33.4. HRMS (ESI)  $m/z$   $[\text{M} + \text{H}]^+$  calcd for  $\text{C}_{20}\text{H}_{22}\text{N}_3$ : 304.1808, found 304.1813.

### **4-Methoxy-*N*-methyl-*N*-phenethylaniline (3aj)**

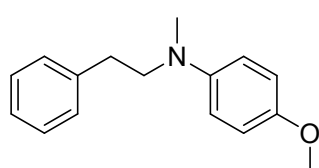

The typical procedure was applied to 2-phenylacetaldehyde (24.0 mg, 0.2 mmol) and 4-methoxy-*N*-methylaniline (32.9 mg, 0.24 mmol) for 6 h. Silica gel chromatography (eluent: PE/EtOAc = 50/1)



of the crude product afforded the title compound as a gray solid (29.1 mg, 60%);  $R_f = 0.5$  (PE/EtOAc = 10/1);  $^1\text{H NMR}$  (400 MHz,  $\text{CDCl}_3$ )  $\delta$  7.37-7.31 (m, 2H), 7.28-7.22 (m, 3H), 6.92-6.88 (m, 2H), 6.79-6.76 (m, 2H), 3.81 (s, 3H), 3.56-3.50 (m, 2H), 2.90-2.84 (m, 5H);  $^{13}\text{C NMR}$  (100 MHz,  $\text{CDCl}_3$ )  $\delta$  151.5, 143.8, 139.9, 128.7, 128.4, 126.1, 114.8, 114.3, 55.8, 55.7, 39.0, 32.6. HRMS (ESI)  $m/z$   $[\text{M} + \text{H}]^+$  calcd for  $\text{C}_{16}\text{H}_{20}\text{NO}$ : 242.1539, found 242.1543.

#### ***N*-Methyl-*N*-phenethyl-[1,1'-biphenyl]-4-amine (3ak)**

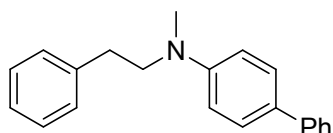

The typical procedure was applied to 2-phenylacetaldehyde (24.0 mg, 0.2 mmol) and *N*-methyl-[1,1'-biphenyl]-4-amine (44.0 mg, 0.24 mmol) for 6 h. Silica gel chromatography (eluent: PE/EtOAc = 80/1) of the crude product afforded the title compound as a white solid (37.1 mg, 65%);  $R_f = 0.7$  (PE/EtOAc = 10/1);  $^1\text{H NMR}$  (400 MHz,  $\text{CDCl}_3$ )  $\delta$  7.48 (d,  $J = 7.4$  Hz, 2H), 7.45-7.42 (m, 2H), 7.31 (t,  $J = 7.6$  Hz, 2H), 7.24-7.21 (m, 2H), 7.19-7.11 (m, 4H), 6.69-6.73 (m, 2H), 3.53-3.49 (m, 2H), 2.83 (s, 3H), 2.81-2.77 (m, 2H);  $^{13}\text{C NMR}$  (100 MHz,  $\text{CDCl}_3$ )  $\delta$  148.1, 141.1, 139.7, 128.8 (two carbons are overlapped), 128.6, 128.5, 127.8, 126.21, 126.19, 125.9, 112.3, 54.7, 38.5, 32.9. HRMS (ESI)  $m/z$   $[\text{M} + \text{H}]^+$  calcd for  $\text{C}_{21}\text{H}_{22}\text{N}$ : 288.1747, found 288.1749.

#### **4-Bromo-*N*-methyl-*N*-phenethylaniline (3al)**

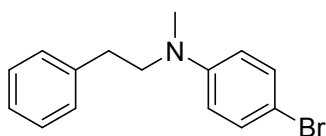

The typical procedure was applied to 2-phenylacetaldehyde (24.0 mg, 0.2 mmol) and 4-bromo-*N*-methylaniline (44.7 mg, 0.24 mmol) for 6 h. Silica gel chromatography (eluent: PE/EtOAc = 100/1) of the crude product afforded the title compound as a yellow solid (45.1 mg, 78%);  $R_f = 0.7$  (PE/EtOAc = 10/1);  $^1\text{H NMR}$  (400 MHz,  $\text{CDCl}_3$ )  $\delta$  7.32-7.28 (m, 4H), 7.26-7.22 (m, 1H), 7.19 (d,  $J = 7.6$  Hz, 2H), 6.59-6.57 (m, 2H), 3.54 (t,  $J = 7.7$  Hz, 2H), 2.84 (s, 3H), 2.84-2.81 (m, 2H);  $^{13}\text{C NMR}$  (100 MHz,  $\text{CDCl}_3$ )  $\delta$  147.7, 139.4, 131.8, 128.7, 128.5, 126.3, 113.6, 107.9, 54.7, 38.6, 32.7. HRMS (ESI)  $m/z$   $[\text{M} + \text{H}]^+$  calcd for  $\text{C}_{15}\text{H}_{17}\text{BrN}$ : 290.0539, found 290.0543.

#### **4-Chloro-*N*-methyl-*N*-phenethylaniline (3am)**

The typical procedure was applied to 2-phenylacetaldehyde (24.0 mg, 0.2 mmol) and 4-chloro-*N*-methylaniline (34.0 mg, 0.24 mmol) for 6 h. Silica gel chromatography (eluent: PE/EtOAc = 200/1) of the crude product afforded the title compound as a yellow solid (31.6

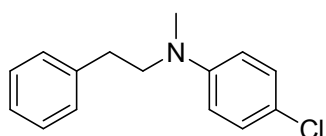

mg, 64%);  $R_f = 0.7$  (PE/EtOAc = 20/1);  $^1\text{H NMR}$  (400 MHz,  $\text{CDCl}_3$ )  $\delta$  7.41-7.37 (m, 2H), 7.31 (d,  $J = 6.3$  Hz, 1H), 7.28-7.25 (m, 4H), 6.70 (d,  $J = 9.0$  Hz, 2H), 3.64-3.60 (m, 2H), 2.93-2.89 (m, 5H);  $^{13}\text{C}$

NMR (100 MHz,  $\text{CDCl}_3$ )  $\delta$  147.3, 139.5, 129.0, 128.7, 128.5, 126.3, 120.8, 113.1, 54.7, 38.6, 32.7. HRMS (ESI)  $m/z$   $[\text{M} + \text{H}]^+$  calcd for  $\text{C}_{15}\text{H}_{17}\text{ClN}$ : 246.1044, found 246.1048.

#### 4-Fluoro-*N*-methyl-*N*-phenethylaniline (3an)

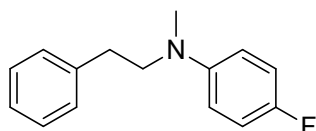

The typical procedure was applied to 2-phenylacetaldehyde (24.0 mg, 0.2 mmol) and 4-fluoro-*N*-methylaniline (30.0 mg, 0.24 mmol) for 6 h. Silica gel chromatography (eluent: PE/EtOAc = 200/1) of

the crude product afforded the title compound as a yellow solid (30.6 mg, 67%);  $R_f = 0.6$  (PE/EtOAc = 20/1);  $^1\text{H NMR}$  (400 MHz,  $\text{CDCl}_3$ )  $\delta$  7.32 (t,  $J = 7.2$  Hz, 2H), 7.26-7.21 (m, 3H), 7.00-6.95 (m, 2H), 6.69-6.66 (m, 2H), 3.56-3.52 (m, 2H), 2.90-2.82 (m, 5H);  $^{13}\text{C}$  NMR (100 MHz,  $\text{CDCl}_3$ )  $\delta$  155.2 (d,  $^1J_{\text{C-F}} = 237.1$  Hz), 145.6, 139.7, 128.7, 128.5, 126.2, 115.6 (d,  $^2J_{\text{C-F}} = 21.9$  Hz), 113.3 (d,  $^3J_{\text{C-F}} = 5.5$  Hz), 55.4, 38.9, 32.7. HRMS (ESI)  $m/z$   $[\text{M} + \text{H}]^+$  calcd for  $\text{C}_{15}\text{H}_{17}\text{FN}$ : 230.1340, found 230.1345.

#### *N*-Methyl-*N*-phenethyl-4-(trifluoromethyl)aniline (3ao)

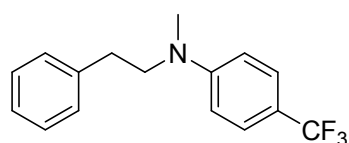

The typical procedure was applied to 2-phenylacetaldehyde (24.0 mg, 0.2 mmol) and *N*-methyl-4-(trifluoromethyl)aniline (42.0 mg, 0.24 mmol) for 6 h. Silica gel chromatography (eluent:

PE/EtOAc = 50/1) of the crude product afforded the title compound as a yellow oil (42.5 mg, 76%);  $R_f = 0.4$  (PE/EtOAc = 10/1);  $^1\text{H NMR}$  (400 MHz,  $\text{CDCl}_3$ )  $\delta$  7.46 (d,  $J = 8.6$  Hz, 2H), 7.31 (t,  $J = 7.3$  Hz, 2H), 7.25-7.18 (m, 3H), 6.69 (d,  $J = 8.8$  Hz, 2H), 3.61 (t,  $J = 7.6$  Hz, 2H), 2.89 (s, 3H), 2.86 (t,  $J = 7.6$  Hz, 2H);  $^{13}\text{C}$  NMR (100 MHz,  $\text{CDCl}_3$ )  $\delta$  150.7, 139.2, 128.8, 128.6, 126.5 (q,  $^3J_{\text{C-F}} = 3.8$  Hz), 127.3 (q,  $^1J_{\text{C-F}} = 237.8$  Hz), 117.2 (q,  $^2J_{\text{C-F}} = 32.5$  Hz), 110.9, 54.4, 38.6, 32.9. The physical and spectral data were consistent with those previously reported.<sup>17</sup>

#### *N*-Heptyl-*N*-phenethylaniline (3ap)

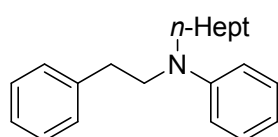

The typical procedure was applied to 2-phenylacetaldehyde (24.0 mg, 0.2 mmol) and *N*-heptylaniline (45.9 mg, 0.24 mmol) for 6 h. Silica

gel chromatography (eluent: PE/EtOAc = 400/1) of the crude product afforded the title compound as a yellow oil (46.0 mg, 84%);  $R_f$  = 0.8 (PE/EtOAc = 10/1);  $^1\text{H}$  NMR (400 MHz,  $\text{CDCl}_3$ )  $\delta$  7.26-7.22 (m, 2H), 7.19-7.13 (m, 5H), 6.64 (d,  $J$  = 8.2 Hz, 2H), 6.59 (t,  $J$  = 7.1 Hz, 1H), 3.46-3.42 (m, 2H), 3.16-3.12 (m, 2H), 2.81-2.77 (m, 2H), 1.51-1.44 (m, 2H), 1.25-1.18 (m, 8H), 0.81 (t,  $J$  = 6.7 Hz, 3H).;  $^{13}\text{C}$  NMR (100 MHz,  $\text{CDCl}_3$ )  $\delta$  147.7, 139.8, 129.3, 128.7, 128.5, 126.2, 115.4, 111.7, 52.9, 51.2, 33.5, 31.9, 29.2, 27.3, 27.1, 22.6, 14.1. HRMS (ESI)  $m/z$   $[\text{M} + \text{H}]^+$  calcd for  $\text{C}_{21}\text{H}_{30}\text{N}$ : 296.2373, found 296.2371.

#### ***N*-Phenethyl-*N*-phenylaniline (3aq)**

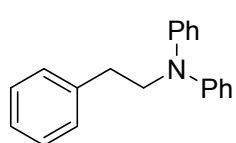

The typical procedure was applied to 2-phenylacetaldehyde (24.0 mg, 0.2 mmol) and diphenylamine (40.6 mg, 0.24 mmol) for 6 h. Silica gel chromatography (eluent: PE/EtOAc = 200/1) of the crude product afforded the title compound as a yellow oil (36.9 mg, 68%);  $R_f$  = 0.8 (PE/EtOAc = 10/1);  $^1\text{H}$  NMR (400 MHz,  $\text{CDCl}_3$ )  $\delta$  7.24-7.15 (m, 6H), 7.13-7.10 (m, 3H), 6.91-6.85 (m, 6H), 3.87-3.83 (m, 2H), 2.90-2.86 (m, 2H);  $^{13}\text{C}$  NMR (100 MHz,  $\text{CDCl}_3$ )  $\delta$  147.7, 139.4, 129.3, 128.8, 128.5, 126.3, 121.2, 120.9, 53.9, 33.6. The physical and spectral data were consistent with those previously reported.<sup>13</sup>

#### **4-Methyl-*N*-phenethyl-*N*-phenylaniline (3ar)**

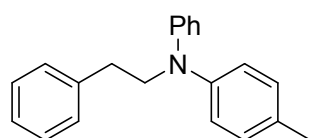

The typical procedure was applied to 2-phenylacetaldehyde (24.0 mg, 0.2 mmol) and 4-methyl-*N*-phenylaniline (44.0 mg, 0.24 mmol) for 6 h. Silica gel chromatography (eluent: PE/EtOAc = 80/1) of the crude product afforded the title compound as a yellow solid (40.1 mg, 70%);  $R_f$  = 0.8 (PE/EtOAc = 10/1);  $^1\text{H}$  NMR (400 MHz,  $\text{CDCl}_3$ )  $\delta$  7.35 (t,  $J$  = 7.2 Hz, 2H), 7.29-7.24 (m, 5H), 7.17 (d,  $J$  = 8.0 Hz, 2H), 7.01 (d,  $J$  = 8.0 Hz, 2H), 6.95-6.89 (m, 3H), 3.97-3.93 (m, 2H), 3.02-2.98 (m, 2H), 2.38 (s, 3H);  $^{13}\text{C}$  NMR (100 MHz,  $\text{CDCl}_3$ )  $\delta$  148.1, 145.0, 139.5, 132.2, 130.0, 129.1, 128.8, 128.5, 126.2, 123.3, 119.6, 118.3, 54.0, 33.6, 20.7. HRMS (ESI)  $m/z$   $[\text{M} + \text{H}]^+$  calcd for  $\text{C}_{21}\text{H}_{22}\text{N}$ : 288.1747, found 288.1744.

#### **4-(2-Methylphenethyl)morpholine (3bc)**

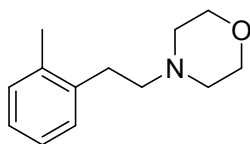

The typical procedure was applied to 2-(*o*-tolyl)acetaldehyde (26.8 mg, 0.2 mmol) and morpholine (20.9 mg, 0.24 mmol) for 10 h. Basic aluminum oxide chromatography (eluent: PE/EtOAc/MeOH = 100/10/1) of the crude product afforded the title compound as a yellow oil (28.1 mg, 68%);  $R_f = 0.2$  (PE/EtOAc/MeOH = 40/10/1);  $^1\text{H NMR}$  (400 MHz,  $\text{CDCl}_3$ )  $\delta$  7.18 (t,  $J = 7.6$  Hz, 1H), 7.03-7.00 (m, 3H), 3.75 (t,  $J = 4.7$  Hz, 4H), 2.80-2.75 (m, 2H), 2.61-2.57 (m, 2H), 2.53 (t,  $J = 4.7$  Hz, 4H), 2.33 (s, 3H);  $^{13}\text{C NMR}$  (100 MHz,  $\text{CDCl}_3$ )  $\delta$  139.9, 137.9, 129.4, 128.3, 126.8, 125.6, 66.9, 60.9, 53.6, 33.1, 21.3. The physical and spectral data were consistent with those previously reported.<sup>18</sup>

#### 4-(3-Methylphenethyl)morpholine (3cc)

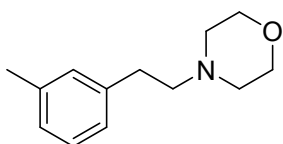

The typical procedure was applied to 2-(*m*-tolyl)acetaldehyde (26.8 mg, 0.2 mmol) and morpholine (20.9 mg, 0.24 mmol) for 10 h. Basic aluminum oxide chromatography (eluent: PE/EtOAc/MeOH = 100/10/1) of the crude product afforded the title compound as a yellow oil (30.8 mg, 75%);  $R_f = 0.2$  (PE/EtOAc/MeOH = 40/10/1);  $^1\text{H NMR}$  (400 MHz,  $\text{CDCl}_3$ )  $\delta$  7.16-7.11 (m, 4H), 3.76 (t,  $J = 4.7$  Hz, 4H), 2.83-2.79 (m, 2H), 2.56-2.52 (m, 6H), 2.33 (s, 3H);  $^{13}\text{C NMR}$  (100 MHz,  $\text{CDCl}_3$ )  $\delta$  138.1, 135.9, 130.2, 129.2, 126.2, 126.0, 66.9, 59.6, 53.7, 30.4, 19.3. The physical and spectral data were consistent with those previously reported.<sup>18</sup>

#### 4-(4-Methylphenethyl)morpholine (3dc)

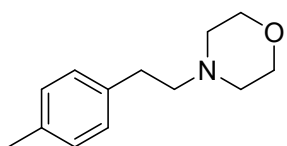

The typical procedure was applied to 2-(*m*-tolyl)acetaldehyde (26.8 mg, 0.2 mmol) and morpholine (20.9 mg, 0.24 mmol) for 10 h. Basic aluminum oxide chromatography (eluent: PE/EtOAc/MeOH = 100/10/1) of the crude product afforded the title compound as a yellow solid (29.5 mg, 72%);  $R_f = 0.2$  (PE/EtOAc/MeOH = 40/10/1);  $^1\text{H NMR}$  (400 MHz,  $\text{CDCl}_3$ )  $\delta$  7.10 (s, 4H), 3.75 (t,  $J = 4.6$  Hz, 4H), 2.80-2.75 (m, 2H), 2.60-2.56 (m, 2H), 2.53 (t,  $J = 4.7$  Hz, 4H), 2.32 (s, 3H);  $^{13}\text{C NMR}$  (100 MHz,  $\text{CDCl}_3$ )  $\delta$  136.9, 135.5, 129.0, 128.5, 66.9, 61.0, 53.7, 32.8, 21.0. The physical and spectral data were consistent with those previously reported.<sup>18</sup>

#### 4-(4-(*tert*-Butyl)phenethyl)morpholine (3ec)

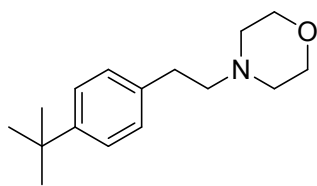

The typical procedure was applied to 2-(4-(*tert*-Butyl)phenyl)acetaldehyde (35.3 mg, 0.2 mmol) and morpholine (20.9 mg, 0.24 mmol) for 10 h. Basic aluminum oxide chromatography (eluent: PE/EtOAc/MeOH = 100/10/1) of the crude product afforded the title compound as a yellow solid (27.8 mg, 56%);  $R_f = 0.3$  (PE/EtOAc/MeOH = 40/10/1);  $^1\text{H NMR}$  (400 MHz,  $\text{CDCl}_3$ )  $\delta$  7.32 (d,  $J = 8.0$  Hz, 2H), 7.15 (d,  $J = 8.0$  Hz, 2H), 3.76 (t,  $J = 4.7$  Hz, 4H), 2.81-2.77 (m, 2H), 2.62-2.58 (m, 2H), 2.54 (t,  $J = 4.8$  Hz, 4H), 1.31 (s, 9H);  $^{13}\text{C NMR}$  (100 MHz,  $\text{CDCl}_3$ )  $\delta$  145.0, 136.9, 128.4, 125.3, 67.0, 60.9, 53.7, 34.4, 32.7, 31.4. HRMS (ESI)  $m/z$   $[\text{M} + \text{H}]^+$  calcd for  $\text{C}_{16}\text{H}_{26}\text{NO}$ : 248.2009, found 248.2008.

#### 4-(4-Methoxyphenethyl)morpholine (3fc)

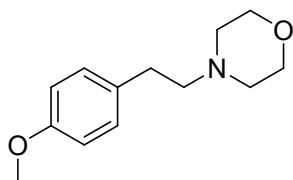

The typical procedure was applied to 2-(4-methoxyphenyl)acetaldehyde (30.3 mg, 0.2 mmol) and morpholine (20.9 mg, 0.24 mmol) for 10 h. Basic aluminum oxide chromatography (eluent: PE/EtOAc/MeOH = 100/10/1) of the crude product afforded the title compound as a yellow solid (33.1 mg, 75%);  $R_f = 0.3$  (PE/EtOAc/MeOH = 40/10/1);  $^1\text{H NMR}$  (400 MHz,  $\text{CDCl}_3$ )  $\delta$  7.12 (d,  $J = 8.2$  Hz, 2H), 6.83 (d,  $J = 8.4$  Hz, 2H), 3.78 (s, 3H), 3.74 (t,  $J = 4.7$  Hz, 4H), 2.77-2.73 (m, 2H), 2.58-2.54 (m, 2H), 2.52 (t,  $J = 4.7$  Hz, 4H);  $^{13}\text{C NMR}$  (100 MHz,  $\text{CDCl}_3$ )  $\delta$  157.9, 132.1, 129.5, 113.8, 66.9, 61.1, 55.2, 53.6, 32.3. The physical and spectral data were consistent with those previously reported.<sup>18</sup>

#### 4-(4-Bromophenethyl)morpholine (3gc)

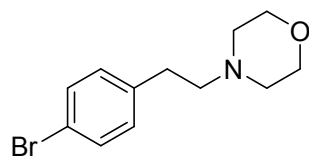

The typical procedure was applied to 2-(4-bromophenyl)acetaldehyde (39.8 mg, 0.2 mmol) and morpholine (20.9 mg, 0.24 mmol) for 10 h. Basic aluminum oxide chromatography (eluent: PE/EtOAc/MeOH = 100/10/1) of the crude product afforded the title compound as a white solid (29.6 mg, 59%);  $R_f = 0.2$  (PE/EtOAc/MeOH = 40/10/1);  $^1\text{H NMR}$  (400 MHz,  $\text{CDCl}_3$ )  $\delta$  7.39 (d,  $J = 7.8$  Hz, 2H), 7.07 (d,  $J = 7.9$  Hz, 2H), 3.72 (bs, 4H), 2.76-2.72

(m, 2H), 2.57-2.53 (m, 2H), 2.49 (bs, 4H);  $^{13}\text{C}$  NMR (100 MHz,  $\text{CDCl}_3$ )  $\delta$  139.0, 131.4, 130.4, 119.8, 66.8, 60.3, 53.5, 32.5. The physical and spectral data were consistent with those previously reported.<sup>19</sup>

#### 4-(2-Morpholinoethyl)phenol (3hc)

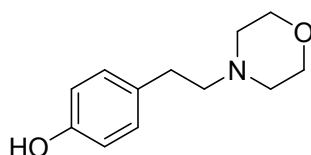

The typical procedure was applied to 2-(4-hydroxyphenyl)acetaldehyde (27.6 mg, 0.2 mmol) and morpholine (20.9 mg, 0.24 mmol) for 10 h. Basic aluminum oxide chromatography (eluent: PE/EtOAc/MeOH = 4/4/1) of the crude product afforded the title compound as a yellow solid (22.0 mg, 53%);  $R_f$  = 0.1 (PE/EtOAc/MeOH = 10/20/1);  $^1\text{H}$  NMR (400 MHz,  $\text{CDCl}_3$ )  $\delta$  7.05 (d,  $J$  = 8.1 Hz, 2H), 6.74 (d,  $J$  = 8.3 Hz, 2H), 3.76 (t,  $J$  = 4.6 Hz, 4H), 2.78-2.73 (m, 2H), 2.61-2.56 (m, 6H);  $^{13}\text{C}$  NMR (100 MHz,  $\text{CDCl}_3$ )  $\delta$  154.3, 131.5, 129.7, 115.4, 66.7, 61.1, 53.6, 32.1. The physical and spectral data were consistent with those previously reported.<sup>20</sup>

#### 4-(2,4,6-Trimethylphenethyl)morpholine (3ic)

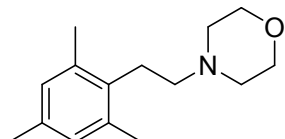

The typical procedure was applied to 2-mesitylacetaldehyde (32.4 mg, 0.2 mmol) and morpholine (32.4 mg, 0.24 mmol) for 10 h. Basic aluminum oxide chromatography (eluent: PE/EtOAc/MeOH = 100/10/1) of the crude product afforded the title compound as a yellow oil (28.4 mg, 61%);  $R_f$  = 0.3 (PE/EtOAc/MeOH = 40/10/1);  $^1\text{H}$  NMR (400 MHz,  $\text{CDCl}_3$ )  $\delta$  6.85 (s, 2H), 3.78 (t,  $J$  = 4.7 Hz, 4H), 2.85-2.79 (m, 2H), 2.58 (t,  $J$  = 4.7 Hz, 4H), 2.44-2.40 (m, 2H), 2.32 (s, 6H), 2.25 (s, 3H);  $^{13}\text{C}$  NMR (100 MHz,  $\text{CDCl}_3$ )  $\delta$  136.2, 135.4, 133.1, 128.9, 66.9, 57.8, 53.6, 26.3, 20.7, 19.7. HRMS (ESI)  $m/z$   $[\text{M} + \text{H}]^+$  calcd for  $\text{C}_{15}\text{H}_{24}\text{NO}$ : 234.1852, found 234.1854.

#### 4-(2-(Naphthalen-1-yl)ethyl)morpholine (3jc)

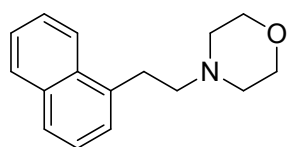

The typical procedure was applied to 2-(naphthalen-1-yl)acetaldehyde (34.1 mg, 0.2 mmol) and morpholine (20.9 mg, 0.24 mmol) for 10 h. Basic aluminum oxide chromatography (eluent: PE/EtOAc/MeOH = 100/10/1) of the crude product afforded the title compound as a yellow oil (30.6 mg, 63%);  $R_f$  = 0.3 (PE/EtOAc/MeOH = 40/10/1);  $^1\text{H}$  NMR (400 MHz,  $\text{CDCl}_3$ )  $\delta$  8.06 (d,  $J$  = 8.3 Hz, 1H),

7.87 (d,  $J = 8.0$  Hz, 1H), 7.74 (d,  $J = 8.0$  Hz, 1H), 7.51 (td,  $J = 14.8, 6.8$  Hz, 2H), 7.43-7.36 (m, 2H), 3.80 (t,  $J = 4.7$  Hz, 4H), 3.32-3.28 (m, 2H), 2.75-2.71 (m, 2H), 2.61 (t,  $J = 4.6$  Hz, 4H);  $^{13}\text{C}$  NMR (100 MHz,  $\text{CDCl}_3$ )  $\delta$  136.1, 133.8, 131.8, 128.8, 126.9, 126.5, 125.9, 125.52, 125.47, 123.5, 66.9, 59.9, 53.7, 30.3. HRMS (ESI)  $m/z$   $[\text{M} + \text{H}]^+$  calcd for  $\text{C}_{16}\text{H}_{20}\text{NO}$ : 242.1539, found 242.1542.

#### (*E*)-4-Cinnamylmorpholine (3kc)

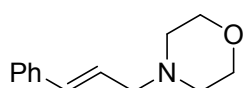

The typical procedure was applied to cinnamaldehyde (26.4 mg, 0.2 mmol) and morpholine (20.9 mg, 0.24 mmol) for 6 h. Basic aluminum oxide chromatography (eluent: PE/EtOAc/MeOH = 100/10/1) of the crude product afforded the title compound as a yellow oil (23.1 mg, 53 %);  $R_f = 0.2$  (PE/EtOAc/MeOH = 40/10/1);  $^1\text{H}$  NMR (400 MHz,  $\text{CDCl}_3$ )  $\delta$  7.44-7.41 (m, 2H), 7.39-7.32 (m, 2H), 7.31-7.27 (m, 1H), 6.46 (dd,  $J = 15.9, 4.9$  Hz, 1H), 6.35-6.27 (m, 1H), 3.79 (t,  $J = 5.1$  Hz, 4H), 3.20 (d,  $J = 6.0$  Hz, 2H), 2.55 (bs, 4H);  $^{13}\text{C}$  NMR (100 MHz,  $\text{CDCl}_3$ )  $\delta$  136.7, 133.5, 128.5, 127.5, 126.3, 125.8, 66.9, 61.4, 53.6. The physical and spectral data were consistent with those previously reported.<sup>21</sup>

#### 4-(3-Phenylpropyl)morpholine (3lc)

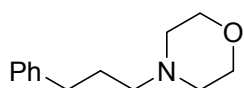

The typical procedure was applied to 3-phenylpropanal (26.8 mg, 0.2 mmol) and morpholine (20.9 mg, 0.24 mmol) for 6 h. Basic aluminum oxide chromatography (eluent: PE/EtOAc/MeOH = 100/10/1) of the crude product afforded the title compound as a yellow oil (24.3 mg, 59%);  $R_f = 0.2$  (PE/EtOAc/MeOH = 40/10/1);  $^1\text{H}$  NMR (400 MHz,  $\text{CDCl}_3$ )  $\delta$  7.36-7.32 (m, 2H), 7.26-7.23 (m, 3H), 3.79-3.77 (m, 4H), 2.73-2.69 (m, 2H), 2.50 (t,  $J = 4.7$  Hz, 4H), 2.45-2.41 (m, 2H), 1.89 (p,  $J = 7.7$  Hz, 2H);  $^{13}\text{C}$  NMR (100 MHz,  $\text{CDCl}_3$ )  $\delta$  142.0, 128.34, 128.28, 125.8, 66.9, 58.3, 53.6, 33.6, 28.2. The physical and spectral data were consistent with those previously reported.<sup>22</sup>

#### *N,N*-Dibenzyl-3,7-dimethyloct-6-en-1-amine (3mh)

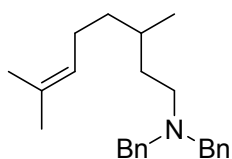

The typical procedure was applied to 3,7-dimethyloct-6-enal (30.8 mg, 0.2 mmol) and dibenzylamine (47.3 mg, 0.24 mmol) for 6 h. Silica gel chromatography (eluent: PE/EtOAc = 200/1) of the crude product afforded the title compound as a white oil (61.4 mg, 91%);  $R_f = 0.8$  (PE/EtOAc = 10/1);  $^1\text{H}$  NMR (400

MHz, CDCl<sub>3</sub>)  $\delta$  7.29-7.27 (m, 4H), 7.23-7.19 (m, 4H), 7.15-7.11 (m, 2H), 4.97 (t,  $J$  = 7.0 Hz, 1H), 3.52-3.40 (m, 4H), 2.34 (t,  $J$  = 7.3 Hz, 2H), 1.93-1.76 (m, 2H), 1.59 (s, 3H), 1.49 (s, 3H), 1.47-1.35 (m, 2H), 1.26-1.11 (m, 2H), 1.04-0.95 (m, 1H), 0.67 (d,  $J$  = 6.5 Hz, 3H); <sup>13</sup>C NMR (100 MHz, CDCl<sub>3</sub>)  $\delta$  139.9, 130.9, 128.8, 128.1, 126.7, 124.9, 58.3, 51.3, 37.1, 34.0, 30.4, 25.7, 25.5, 19.6, 17.6. The physical and spectral data were consistent with those previously reported.<sup>23</sup>

### ***N*-Methyl-*N*-(2-phenylpropyl)aniline (3ns)**

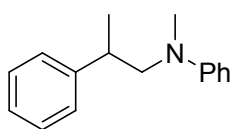

The typical procedure was applied to 2-phenylpropanal (26.8 mg, 0.2 mmol) and *N*-methylaniline (25.7 mg, 0.24 mmol) for 6 h. Silica gel chromatography (eluent: PE/EtOAc = 50/1) of the crude product afforded the title compound as a yellow oil (33.7 mg, 75%);  $R_f$  = 0.8 (PE/EtOAc = 10/1); <sup>1</sup>H NMR (400 MHz, CDCl<sub>3</sub>)  $\delta$  7.23-7.19 (m, 2H), 7.17-7.11 (m, 5H), 6.62-6.57 (m, 3H), 3.41 (dd,  $J$  = 14.6, 7.6 Hz, 1H), 3.30 (dd,  $J$  = 14.6, 7.1 Hz, 1H), 3.16-3.07 (m, 1H), 2.66 (s, 3H), 1.22 (d,  $J$  = 7.0 Hz, 3H); <sup>13</sup>C NMR (100 MHz, CDCl<sub>3</sub>)  $\delta$  148.9, 145.1, 129.1, 128.4, 127.2, 126.3, 115.7, 111.7, 60.9, 39.5, 38.2, 18.8. The physical and spectral data were consistent with those previously reported.<sup>24</sup>

### ***N*-(2,2-Diphenylethyl)-*N*-methylaniline (3os)**

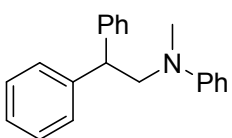

The typical procedure was applied to 2,2-diphenylacetaldehyde (39.2 mg, 0.2 mmol) and *N*-methylaniline (25.7 mg, 0.24 mmol) for 6 h. Silica gel chromatography (eluent: PE/EtOAc = 200/1) of the crude product afforded the title compound as a yellow oil (36.8 mg, 64%);  $R_f$  = 0.7 (PE/EtOAc = 20/1); <sup>1</sup>H NMR (400 MHz, CDCl<sub>3</sub>)  $\delta$  7.25-7.11 (m, 12H), 6.62 (t,  $J$  = 7.2 Hz, 1H), 6.56 (d,  $J$  = 8.2 Hz, 2H), 4.31 (t,  $J$  = 7.4 Hz, 1H), 3.92 (d,  $J$  = 7.4 Hz, 2H), 2.48 (s, 3H); <sup>13</sup>C NMR (100 MHz, CDCl<sub>3</sub>)  $\delta$  148.6, 143.1, 129.2, 128.5, 128.2, 126.5, 115.9, 111.9, 58.6, 48.6, 39.5. HRMS (ESI)  $m/z$  [M + H]<sup>+</sup> calcd for C<sub>21</sub>H<sub>22</sub>N: 288.1747, found 288.1752.

### **4-(2-(1-Tosyl-1*H*-indol-3-yl)ethyl)morpholine (3pc)**

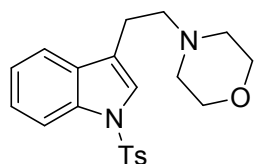

The typical procedure was applied to 2-(1-tosyl-1*H*-indol-3-yl)acetaldehyde (62.7 mg, 0.2 mmol) and morpholine (20.9 mg, 0.24



mmol) for 10 h. Basic aluminum oxide chromatography (eluent: PE/EtOAc/MeOH = 100/10/1) of the crude product afforded the title compound as a yellow oil (58.6 mg, 76%);  $R_f = 0.3$  (PE/EtOAc/MeOH = 40/10/1);  $^1\text{H NMR}$  (400 MHz,  $\text{CDCl}_3$ )  $\delta$  8.02 (d,  $J = 8.3$  Hz, 1H), 7.79 (d,  $J = 7.9$  Hz, 2H), 7.53 (d,  $J = 7.8$  Hz, 1H), 7.44 (s, 1H), 7.36 (t,  $J = 7.7$  Hz, 1H), 7.31-7.30 (m, 1H), 7.28-7.24 (m, 2H), 3.79 (t,  $J = 4.7$  Hz, 4H), 2.92-2.89 (m, 2H), 2.74-2.70 (m, 2H), 2.58 (t,  $J = 4.6$  Hz, 4H), 2.38 (s, 3H);  $^{13}\text{C NMR}$  (100 MHz,  $\text{CDCl}_3$ )  $\delta$  144.7, 135.3, 135.1, 130.9, 129.8, 126.7, 124.6, 123.0, 120.7, 119.3, 113.7, 66.9, 58.1, 53.6, 22.3, 21.5. HRMS (ESI)  $m/z$   $[\text{M} + \text{H}]^+$  calcd for  $\text{C}_{21}\text{H}_{25}\text{N}_2\text{O}_3\text{S}$ : 385.1580, found 385.1578.

### 3.3 General Procedure for $\beta$ -Deuteration of Amines.

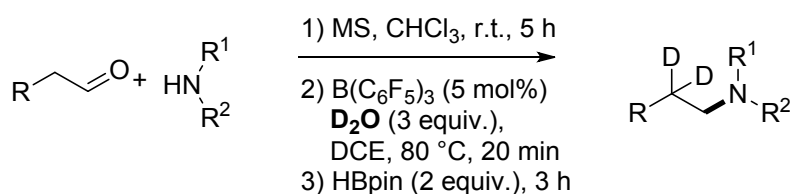

In a Schlenk tube were placed secondary amine (0.24 mmol), arylacetaldehyde (0.2 mmol), MS 4Å (135 mg) and  $\text{CH}_3\text{Cl}$  (0.4 mL). The resulting mixture was stirred at room temperature for 5 h ( $0^\circ\text{C}$ , 0.5 h for morpholine), and then filtered and the solvent was concentrated under reduced pressure. The correspond enamine was directly used without further purification. In the glove box, to a Schlenk tube were placed the crude enamine,  $\text{D}_2\text{O}$  (12.0 mg, 0.6 mmol),  $\text{B}(\text{C}_6\text{F}_5)_3$  (5.1 mg, 0.01 mmol), and DCE (0.8 mL). The resulting mixture was stirred at  $80^\circ\text{C}$  for 20 min, and then allowed to room temperature. HBpin (51.2 mg, 0.4 mmol, 2.0 equiv.) was added under  $\text{N}_2$ . The resulting mixture was stirred at  $80^\circ\text{C}$  for 3 h, and then allowed to room temperature. The solution was concentrated in vacuo before purifying by column chromatography. The deuterium incorporation is detected from  $^1\text{H NMR}$ .

#### 1-(2-Phenylethyl-2,2- $d_2$ )pyrrolidine (3aa- $d$ )

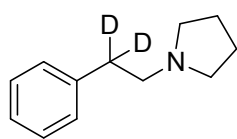

The typical procedure was applied to 2-phenylacetaldehyde (24.0 mg, 0.2 mmol) and pyrrolidine (17.1 mg, 0.24 mmol) for 3 h. Basic aluminum oxide chromatography (eluent: PE/EtOAc/MeOH = 100/10/1) of the crude product afforded the title compound as a colorless oil (29.4 mg, 84%, 173%D);  $R_f = 0.3$

(PE/EtOAc/MeOH = 40/10/1);  $^1\text{H}$  NMR (400 MHz,  $\text{CDCl}_3$ )  $\delta$  7.30-7.26 (m, 2H), 7.22-7.17 (m, 3H), 2.84-2.80 (m, 0.28H), 2.70 (d,  $J = 6.7$  Hz, 2H), 2.60-2.57 (m, 4H), 1.85-1.77 (m, 4H);  $^{13}\text{C}$  NMR (100 MHz,  $\text{CDCl}_3$ )  $\delta$  140.3, 128.6, 128.3, 126.0, 58.2 (m), 54.1, 35.1 (m, labeled), 23.4. HRMS (ESI)  $m/z$   $[\text{M} + \text{H}]^+$  calcd for  $\text{C}_{12}\text{H}_{16}\text{D}_2\text{N}$ : 178.1559, found 178.1564.

### 1-(2-Phenylethyl-2,2- $d_2$ )piperidine (3ab- $d$ )

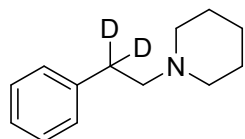

The typical procedure was applied to 2-phenylacetaldehyde (24.0 mg, 0.2 mmol) and piperidine (20.4 mg, 0.24 mmol) for 3 h. Basic aluminum oxide chromatography (eluent: PE/EtOAc/MeOH = 100/10/1) of the crude product afforded the title compound as a yellow oil (37.9 mg, 72%, 169%D);  $R_f = 0.3$  (PE/EtOAc/MeOH = 40/10/1);  $^1\text{H}$  NMR (400 MHz,  $\text{CDCl}_3$ )  $\delta$  7.36-7.32 (m, 2H), 7.27-7.23 (m, 3H), 2.86 (m, 0.30H), 2.63 (d,  $J = 7.0$  Hz, 2H), 2.54 (s, 4H), 1.71-1.66 (m, 4H), 1.53 (q,  $J = 6.0$  Hz, 2H);  $^{13}\text{C}$  NMR (100 MHz,  $\text{CDCl}_3$ )  $\delta$  140.4, 128.6, 128.3, 125.9, 61.1 (m), 54.4, 32.9 (m, labeled), 25.8, 24.3. HRMS (ESI)  $m/z$   $[\text{M} + \text{H}]^+$  calcd for  $\text{C}_{13}\text{H}_{18}\text{D}_2\text{NO}$ : 192.1716, found 192.1714.

### *N*-Methyl-*N*-(2-phenylethyl-2,2- $d_2$ )cyclohexanamine (3ag- $d$ )

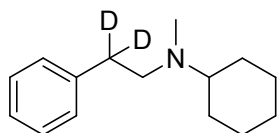

The typical procedure was applied to 2-phenylacetaldehyde (24.0 mg, 0.2 mmol) and *N*-methylcyclohexanamine (27.2 mg, 0.24 mmol) for 3 h. Basic aluminum oxide chromatography (eluent: PE/EtOAc/MeOH = 100/10/1) of the crude product afforded the title compound as a yellow oil (33.9 mg, 78%, 140%D);  $R_f = 0.3$  (PE/EtOAc/MeOH = 40/10/1);  $^1\text{H}$  NMR (400 MHz,  $\text{CDCl}_3$ )  $\delta$  7.22-7.17 (m, 2H), 7.13-7.09 (m, 3H), 2.70-2.64 (m, 0.60H), 2.62 (d,  $J = 5.7$  Hz, 2H), 2.40-2.34 (m, 1H), 2.36 (s, 3H), 1.79-1.67 (m, 4H), 1.57-1.52 (m, 1H), 1.22-1.12 (m, 5H);  $^{13}\text{C}$  NMR (100 MHz,  $\text{CDCl}_3$ )  $\delta$  140.5, 128.6, 128.3, 125.9, 62.6, 55.7 (m), 37.7, 28.5, 26.3, 25.9. (Labeled C was not detected due to low scan times). HRMS (ESI)  $m/z$   $[\text{M} + \text{H}]^+$  calcd for  $\text{C}_{15}\text{H}_{22}\text{D}_2\text{N}$ : 220.2029, found 220.2029.

### *N,N*-Dibenzyl-2-phenylethan-1-amine-2,2- $d_2$ (3ah- $d$ )

The typical procedure was applied to 2-phenylacetaldehyde (24.0 mg, 0.2 mmol) and dibenzylamine (47.3 mg, 0.24 mmol) for 3 h. Silica gel chromatography (eluent: PE/EtOAc =

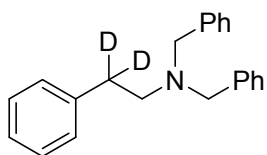

200/1) of the crude product afforded the title compound as a yellow oil (35.9 mg, 60%, 173%D);  $R_f = 0.7$  (PE/EtOAc = 10/1);  $^1\text{H NMR}$  (400 MHz,  $\text{CDCl}_3$ )  $\delta$  7.25-7.06 (m, 13H), 6.99 (d,  $J = 7.3$  Hz, 2H) 3.56 (s, 4H), 2.73-2.69 (m, 0.27H), 2.62 (d,  $J = 5.5$  Hz, 2H);  $^{13}\text{C NMR}$  (100 MHz,  $\text{CDCl}_3$ )  $\delta$  140.5, 139.7, 128.8, 128.7, 128.2, 128.1, 126.8, 125.8, 58.2, 55.0 (m). (Labeled C was not detected due to low scan times). HRMS (ESI)  $m/z$   $[\text{M} + \text{H}]^+$  calcd for  $\text{C}_{22}\text{H}_{22}\text{D}_2\text{N}$ : 304.2029, found 304.2032.

#### 2-(2-Phenylethyl-2,2- $d_2$ )-1,2,3,4-tetrahydroisoquinoline (3af- $d$ )

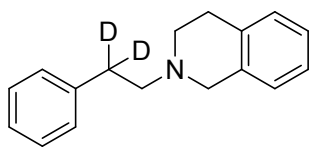

The typical procedure was applied to 2-phenylacetaldehyde (24.0 mg, 0.2 mmol) and 1,2,3,4-tetrahydroisoquinoline (32.0 mg, 0.24 mmol) for 3 h. Basic aluminum oxide chromatography (eluent: PE/EtOAc/MeOH = 100/10/1) of the crude product afforded the title compound as a yellow oil (28.0 mg, 59%, 142%D);  $R_f = 0.3$  (PE/EtOAc/MeOH = 40/10/1);  $^1\text{H NMR}$  (400 MHz,  $\text{CDCl}_3$ )  $\delta$  7.38 (t,  $J = 7.3$  Hz, 2H), 7.33-7.27 (m, 3H), 7.21-7.20 (m, 3H), 7.13-7.12 (m, 1H), 3.81 (s, 2H), 3.04-2.97 (m, 2.58H), 2.90 (t,  $J = 6.0$  Hz, 2H), 2.86 (d,  $J = 6.2$  Hz, 2H);  $^{13}\text{C NMR}$  (100 MHz,  $\text{CDCl}_3$ )  $\delta$  140.2, 134.5, 134.1, 128.7, 128.6, 128.4, 126.6, 126.2, 126.1, 125.6, 60.0 (m), 55.9, 50.9, 33.6 (m, labeled), 28.9. HRMS (ESI)  $m/z$   $[\text{M} + \text{H}]^+$  calcd for  $\text{C}_{17}\text{H}_{18}\text{D}_2\text{N}$ : 240.1716, found 240.1711.

#### 4-Methoxy-*N*-methyl-*N*-(2-phenylethyl-2,2- $d_2$ )aniline (3aj- $d$ )

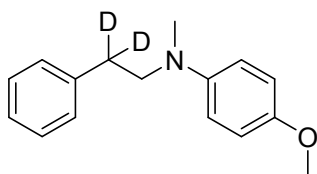

The typical procedure was applied to 2-phenylacetaldehyde (24.0 mg, 0.2 mmol) and 4-methoxy-*N*-methylaniline (32.9 mg, 0.24 mmol) for 3 h. Silica gel chromatography (eluent: PE/EtOAc = 80/1) of the crude product afforded the title compound as a yellow solid (33.5 mg, 69 %, 151%D);  $R_f = 0.5$  (PE/EtOAc = 10/1);  $^1\text{H NMR}$  (400 MHz,  $\text{CDCl}_3$ )  $\delta$  7.31-7.27 (m, 2H), 7.24-7.18 (m, 3H), 6.86 (d,  $J = 9.1$  Hz, 2H), 6.73 (d,  $J = 9.1$  Hz, 2H), 3.77 (s, 3H), 3.48 (d,  $J = 7.1$  Hz, 2H), 2.85 (s, 3H), 2.81-2.77 (m, 0.49H);  $^{13}\text{C NMR}$  (100 MHz,  $\text{CDCl}_3$ )  $\delta$  151.6, 143.7, 139.8, 128.7, 128.5, 126.1, 114.8, 114.5, 55.81 (m), 55.76, 39.1, 32.4 (m, labeled). HRMS (ESI)  $m/z$   $[\text{M} + \text{H}]^+$  calcd for  $\text{C}_{16}\text{H}_{18}\text{D}_2\text{NO}$ : 244.1665, found 244.1668.

#### ***N*-Heptyl-*N*-(2-phenylethyl-2,2-*d*<sub>2</sub>)aniline (3ap-*d*)**

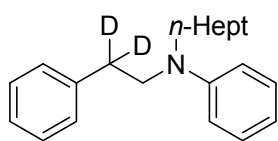

The typical procedure was applied to 2-phenylacetaldehyde (24.0 mg, 0.2 mmol) and *N*-heptylaniline (45.9 mg, 0.24 mmol) for 3 h. Silica gel chromatography (eluent: PE/EtOAc = 200/1) of the crude product afforded the title compound as a yellow oil (39.4 mg, 70%, 162%D);  $R_f$  = 0.8 (PE/EtOAc = 10/1);  $^1\text{H NMR}$  (400 MHz,  $\text{CDCl}_3$ )  $\delta$  7.35-7.31 (m, 2H), 7.28-7.22 (m, 5H), 6.74 (d,  $J$  = 8.2 Hz, 2H), 6.69 (t,  $J$  = 7.2 Hz, 1H), 3.53 (d,  $J$  = 6.8 Hz, 2H), 3.25-3.21 (m, 2H), 2.89-2.85 (m, 0.38H), 1.62-1.54 (m, 2H), 1.34-1.28 (m, 8H), 0.91 (t,  $J$  = 6.6 Hz, 3H).;  $^{13}\text{C NMR}$  (100 MHz,  $\text{CDCl}_3$ )  $\delta$  147.7, 139.7, 129.3, 128.7, 128.5, 126.2, 115.4, 111.7, 52.8 (m), 51.2, 31.9, 29.2, 27.3, 27.1, 22.6, 14.1. (Labeled C was not detected due to low scan times). HRMS (ESI)  $m/z$   $[\text{M} + \text{H}]^+$  calcd for  $\text{C}_{21}\text{H}_{28}\text{D}_2\text{N}$ : 298.2498, found 298.2494.

#### **4-(3-Phenylpropyl-2,2-*d*<sub>2</sub>)morpholine (3lc-*d*)**

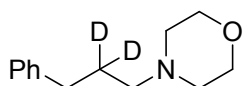

The typical procedure was applied to 3-phenylpropanal (26.8 mg, 0.2 mmol) and morpholine (20.9 mg, 0.24 mmol) for 3 h. Basic aluminum oxide chromatography (eluent: PE/EtOAc/MeOH = 100/10/1) of the crude product afforded the title compound as a yellow oil (19.0 mg, 46%, 164%D);  $R_f$  = 0.4 (PE/EtOAc/MeOH = 40/10/1);  $^1\text{H NMR}$  (400 MHz,  $\text{CDCl}_3$ )  $\delta$  7.30-7.26 (m, 2H), 7.19-7.15 (m, 3H), 3.72 (t,  $J$  = 4.7 Hz, 4H), 2.77-2.73 (m, 0.36H), 2.64 (d,  $J$  = 7.0 Hz, 2H), 2.44 (bs, 4H), 2.36 (d,  $J$  = 6.6 Hz, 2H);  $^{13}\text{C NMR}$  (100 MHz,  $\text{CDCl}_3$ )  $\delta$  142.0, 128.35, 128.30, 125.8, 66.9, 58.2 (m), 53.6, 33.4 (m), 27.5 (m, labeled). HRMS (ESI)  $m/z$   $[\text{M} + \text{H}]^+$  calcd for  $\text{C}_{13}\text{H}_{18}\text{D}_2\text{NO}$ : 208.1665, found 208.1665.

#### **4-(2-Mesitylethyl-2,2-*d*<sub>2</sub>)morpholine (3ic-*d*)**

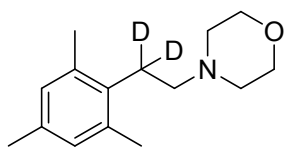

The typical procedure was applied to 2-mesitylacetaldehyde (32.4 mg, 0.2 mmol) and morpholine (32.4 mg, 0.24 mmol) for 3 h. Basic aluminum oxide chromatography (eluent: PE/EtOAc/MeOH = 100/10/1) of the crude product afforded the title compound as a yellow oil (26.1 mg, 56%, 170%D);  $R_f$  = 0.2 (PE/EtOAc/MeOH = 40/10/1);  $^1\text{H NMR}$  (400 MHz,  $\text{CDCl}_3$ )  $\delta$  6.84 (s, 2H), 3.78 (t,  $J$  = 4.7 Hz, 4H), 2.83-2.79 (m, 0.30H), 2.57 (t,  $J$  = 4.7 Hz, 4H), 2.42 (d,  $J$  = 6.4 Hz, 2H), 2.31 (s, 6H), 2.25 (s, 3H);  $^{13}\text{C NMR}$  (100 MHz,  $\text{CDCl}_3$ )  $\delta$  136.2, 135.4, 133.1, 128.9, 66.9, 57.7

(m), 53.6, 20.7, 19.7 (labeled C was not detected due to low scan times). HRMS (ESI)  $m/z$  [M + H]<sup>+</sup> calcd for C<sub>15</sub>H<sub>22</sub>D<sub>2</sub>NO: 236.1978, found 236.1980.

#### 4-(2-(Naphthalen-1-yl)ethyl-2,2-*d*<sub>2</sub>)morpholine (3jc-*d*)

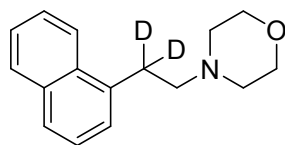

The typical procedure was applied to 2-(naphthalen-1-yl)acetaldehyde (34.1 mg, 0.2 mmol) and morpholine (20.9 mg, 0.24 mmol) for 3 h.

Basic aluminum oxide chromatography (eluent: PE/EtOAc/MeOH = 100/10/1) of the crude product afforded the title compound as a yellow oil (36.2 mg, 75 %, 175%D);  $R_f$  = 0.4 (PE/EtOAc/MeOH = 40/10/1); <sup>1</sup>H NMR (400 MHz, CDCl<sub>3</sub>)  $\delta$  8.06 (d,  $J$  = 8.2 Hz, 1H), 7.86 (d,  $J$  = 7.2 Hz, 1H), 7.73 (d,  $J$  = 8.1 Hz, 1H), 7.55-7.47 (m, 2H), 7.43-7.35 (m, 2H), 3.80 (t,  $J$  = 4.7 Hz, 4H), 3.31-3.25 (m, 0.25H), 2.72 (d,  $J$  = 6.9 Hz, 2H), 2.61 (t,  $J$  = 4.6 Hz, 4H); <sup>13</sup>C NMR (100 MHz, CDCl<sub>3</sub>)  $\delta$  136.1, 133.8, 131.8, 128.8, 126.9, 126.5, 125.9, 125.6, 125.5, 123.6, 67.0, 59.9 (m), 53.7. (labeled C was not detected due to low scan times). HRMS (ESI)  $m/z$  [M + H]<sup>+</sup> calcd for C<sub>16</sub>H<sub>18</sub>D<sub>2</sub>NO: 244.1665, found 244.1670.

#### 2-Phenyl-*N,N*-bis(pyridin-2-ylmethyl)ethan-1-amine-2,2-*d*<sub>2</sub> (3ai-*d*)

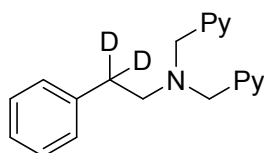

The typical procedure was applied to 2-phenylacetaldehyde (24.0 mg, 0.2 mmol) and bis(pyridin-2-ylmethyl)amine (47.8 mg, 0.24 mmol) for 3 h. Basic aluminum oxide chromatography (eluent: PE/EtOAc/MeOH = 100/10/1) of the crude product afforded the title compound as a yellow oil (36.5 mg, 60%, 171%D);  $R_f$  = 0.2 (PE/EtOAc/MeOH = 40/10/1); <sup>1</sup>H NMR (400 MHz, CDCl<sub>3</sub>)  $\delta$  8.53 (d,  $J$  = 4.9 Hz, 2H), 7.61 (t,  $J$  = 7.7 Hz, 2H), 7.40 (d,  $J$  = 7.9 Hz, 2H), 7.29-7.25 (m, 2H), 7.22-7.20 (m, 1H), 7.17-7.11 (m, 4H), 3.91 (s, 4H), 2.84-2.83 (m, 2.29H); <sup>13</sup>C NMR (100 MHz, CDCl<sub>3</sub>)  $\delta$  159.5, 148.7, 140.2, 136.4, 128.8, 128.1, 125.8, 122.7, 121.8, 60.1, 55.8 (m). (labeled C was not detected due to low scan times). HRMS (ESI)  $m/z$  [M + H]<sup>+</sup> calcd for C<sub>20</sub>H<sub>22</sub>N<sub>3</sub>: 306.1934, found 306.1927.

#### 1-((4-Chlorophenyl)(phenyl)methyl)-4-(2-phenylethyl-2,2-*d*<sub>2</sub>)piperazine (3at-*d*)

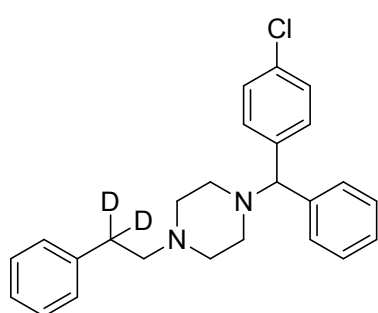

The typical procedure was applied to 2-phenylacetaldehyde (24.0 mg, 0.2 mmol) and 1-((4-chlorophenyl)(phenyl)methyl)piperazine (68.8 mg, 0.24 mmol)

for 3 h. Silica gel chromatography (eluent: PE/EtOAc = 10/1) of the crude product afforded the title compound as a yellow oil (42.6 mg, 54%, 142%D);  $R_f = 0.7$  (PE/EtOAc = 1/1);  $^1\text{H NMR}$  (400 MHz,  $\text{CDCl}_3$ )  $\delta$  7.39-7.36 (m, 4H), 7.30-7.24 (m, 6H), 7.21-7.18 (m, 4H), 4.22 (s, 1H), 2.80-2.76 (m, 0.54H), 2.62-2.45 (m, 10H);  $^{13}\text{C NMR}$  (100 MHz,  $\text{CDCl}_3$ )  $\delta$  142.1, 141.3, 140.1, 132.5, 129.1, 128.63 (two carbons are overlapped), 128.57, 128.4, 127.8, 127.1, 126.1, 75.4, 60.2 (m), 53.3, 51.6, 33.0 (m, labeled). HRMS (ESI)  $m/z$   $[\text{M} + \text{H}]^+$  calcd for  $\text{C}_{25}\text{H}_{26}\text{D}_2\text{ClN}_2$ : 393.2061, found 393.2063.

***N*-(2,6-Dimethylphenyl)-2-(4-(2-phenylethyl-2,2- $d_2$ )piperazin-1-yl)acetamide (3au-*d*)**

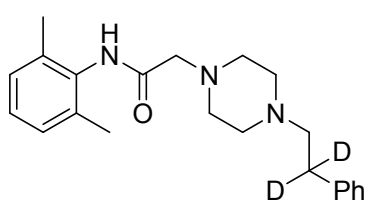

The typical procedure was applied to 2-phenylacetaldehyde (24.0 mg, 0.2 mmol) and *N*-(2,6-dimethylphenyl)-2-(piperazin-1-yl)acetamide (59.4 mg, 0.24 mmol) for 3 h. Basic aluminum oxide chromatography (eluent: PE/EtOAc/MeOH = 100/10/1) of

the crude product afforded the title compound as a yellow oil (40.4 mg, 57%, 163%D);  $R_f = 0.4$  (PE/EtOAc/MeOH = 40/10/1);  $^1\text{H NMR}$  (400 MHz,  $\text{CDCl}_3$ )  $\delta$  8.68 (bs, 1H), 7.32-7.28 (m, 2H), 7.22-7.20 (m, 3H), 7.11-7.07 (m, 3H), 3.23 (s, 2H), 2.83-2.77 (m, 4.37H), 2.65-2.62 (m, 6H), 2.24 (s, 6H);  $^{13}\text{C NMR}$  (100 MHz,  $\text{CDCl}_3$ )  $\delta$  168.5, 139.9, 134.9, 133.6, 128.6, 128.4, 128.3, 127.2, 126.1, 61.6, 60.2 (m), 53.7, 53.3, 18.6. (labeled C was not detected due to low scan times). HRMS (ESI)  $m/z$   $[\text{M} + \text{H}]^+$  calcd for  $\text{C}_{27}\text{H}_{27}\text{D}_2\text{FNO}_3$ : 436.2252, found 436.2248.

**3-((Benzo[*d*][1,3]dioxol-5-yloxy)methyl)-4-(4-fluorophenyl)-1-(2-phenylethyl-2,2- $d_2$ )piperidine (3av-*d*)**

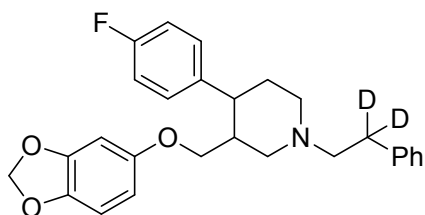

The typical procedure was applied to 2-phenylacetaldehyde (24.0 mg, 0.2 mmol) and 3-((benzo[*d*][1,3]dioxol-5-yloxy)methyl)-4-(4-fluorophenyl)piperidine (87.8 mg, 0.24 mmol) for 3 h. Silica gel chromatography (eluent: PE/EtOAc

= 10/1) of the crude product afforded the title compound as a yellow oil (60.1 mg, 69%, 158%D);  $R_f = 0.6$  (PE/EtOAc = 1/1);  $^1\text{H NMR}$  (400 MHz,  $\text{CDCl}_3$ )  $\delta$  7.39 (t,  $J = 7.4$  Hz, 2H), 7.34-7.31 (m, 3H), 7.26 (t,  $J = 6.8$  Hz, 2H), 7.06 (t,  $J = 8.4$  Hz, 2H), 6.71 (d,  $J = 8.4$  Hz, 1H), 6.44 (d,  $J = 2.7$  Hz, 1H), 6.22 (dd,  $J = 8.4, 2.6$  Hz, 1H), 5.96 (s, 2H), 3.67 (dd,  $J = 9.3, 2.9$  Hz,

1H), 3.54 (t,  $J = 8.1$  Hz, 1H), 3.46 (d,  $J = 11.1$ , 1H), 3.24 (d,  $J = 11.2$  Hz, 1H), 2.96-2.93 (m, 0.42H), 2.77 (s, 2H), 2.59 (td,  $J = 11.4$ , 4.5 Hz, 1H), 2.37-2.31 (m, 1H), 2.28-2.19 (m, 2H), 2.06-1.92 (m, 2H);  $^{13}\text{C}$  NMR (100 MHz,  $\text{CDCl}_3$ )  $\delta$  161.5 (d,  $^1J_{\text{C-F}} = 244.5$  Hz), 154.3, 148.1, 141.5, 140.1, 139.5 (d,  $^4J_{\text{C-F}} = 3.2$  Hz), 128.8 (d,  $^3J_{\text{C-F}} = 7.7$  Hz), 128.7 (two carbons are overlapped), 128.4 (two carbons are overlapped), 126.1, 115.4 (d,  $^2J_{\text{C-F}} = 21.1$  Hz), 107.8, 105.5, 101.0, 97.9, 69.5, 60.7 (m), 57.4, 54.0, 44.0, 42.0, 34.1. (labeled C was not detected due to low scan times). HRMS (ESI)  $m/z$   $[\text{M} + \text{H}]^+$  calcd for  $\text{C}_{22}\text{H}_{28}\text{D}_2\text{N}_3\text{O}$ : 354.2509, found 354.2507.

### 3.4 General Procedure for Control Experiments.

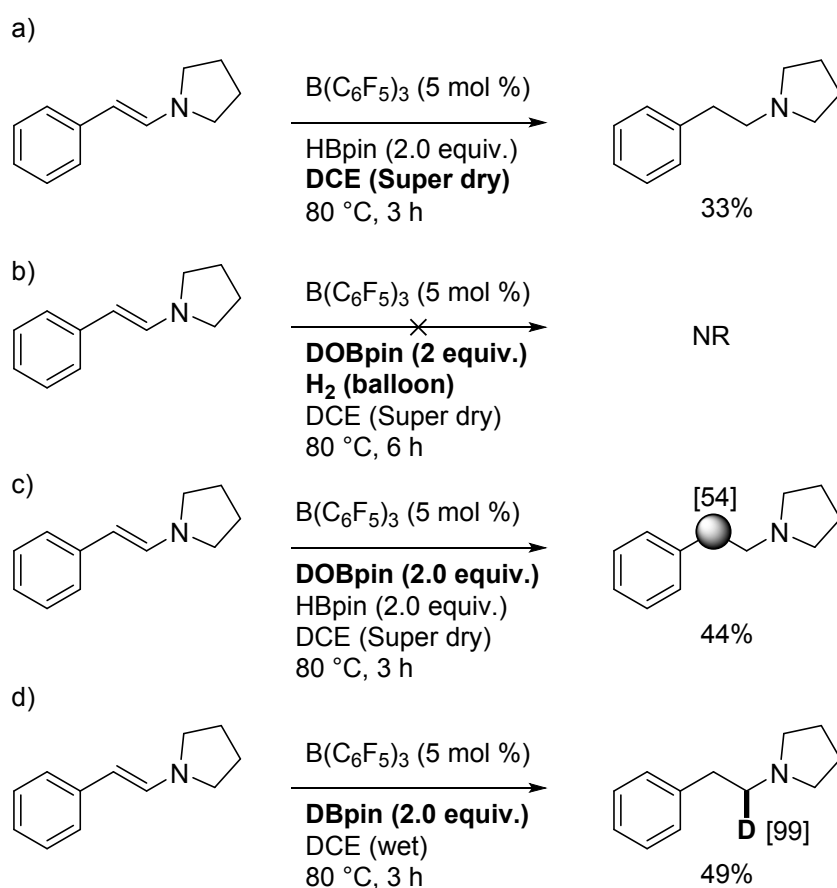

**a)** The typical procedure of synthesis of amine was applied to (*E*)-1-styrylpyrrolidine (35.1 mg, 0.2 mmol),  $\text{B}(\text{C}_6\text{F}_5)_3$  (5.1 mg, 0.01 mol), HBpin (51.2 mg, 0.4 mmol, 2.0 equiv.) and super dry DCE (0.8 mL). The crude yield was detected from  $^1\text{H}$  NMR using 1,1,2,2-tetrachloroethane as an internal standard. (NMR yield: 33%).

**b)** In the glove box, in an over-dried Schlenk tube were placed D<sub>2</sub>O (8.0 mg, 0.4 mmol, 2.0 equiv.), and HBpin (51.2 mg, 0.4 mmol, 2.0 equiv.) and super dry DCE (0.8 mL) to generate DOBpin *in situ*. The resulting mixture was stirred at room temperature for 2 h, and then the purified (*E*)-1-styrylpyrrolidine (35.1 mg, 0.2 mmol), B(C<sub>6</sub>F<sub>5</sub>)<sub>3</sub> (5.1 mg, 0.01 mol) were added. The resulting mixture was stirred with a H<sub>2</sub> balloon at 80 °C for 3 h, and then allowed to room temperature. The solution was concentrated in *vacuo*. The crude yield and deuterium incorporation were detected from <sup>1</sup>H NMR using 1,1,2,2-tetrachloroethane as an internal standard. (NMR yield: 0%).

**c)** In the glove box, in an over-dried Schlenk tube were placed D<sub>2</sub>O (8.0 mg, 0.4 mmol, 2.0 equiv.), and HBpin (51.2 mg, 0.4 mmol, 2.0 equiv.) and super dry DCE (0.8 mL) to generate DOBpin *in situ*. The resulting mixture was stirred at room temperature for 2 h, and then the purified (*E*)-1-styrylpyrrolidine (35.1 mg, 0.2 mmol), B(C<sub>6</sub>F<sub>5</sub>)<sub>3</sub> (5.1 mg, 0.01 mol) and HBpin (51.2 mg, 0.4 mmol, 2.0 equiv.) were added. The resulting mixture was stirred at 80 °C for 3 h, and then allowed to room temperature. The solution was concentrated in *vacuo* before purifying by column chromatography. Silica gel chromatography (eluent: PE/EtOAc/MeOH = 40/10/1) of the crude product afforded the title compound as a yellow oil (15.4 mg, 44%, 108%D).



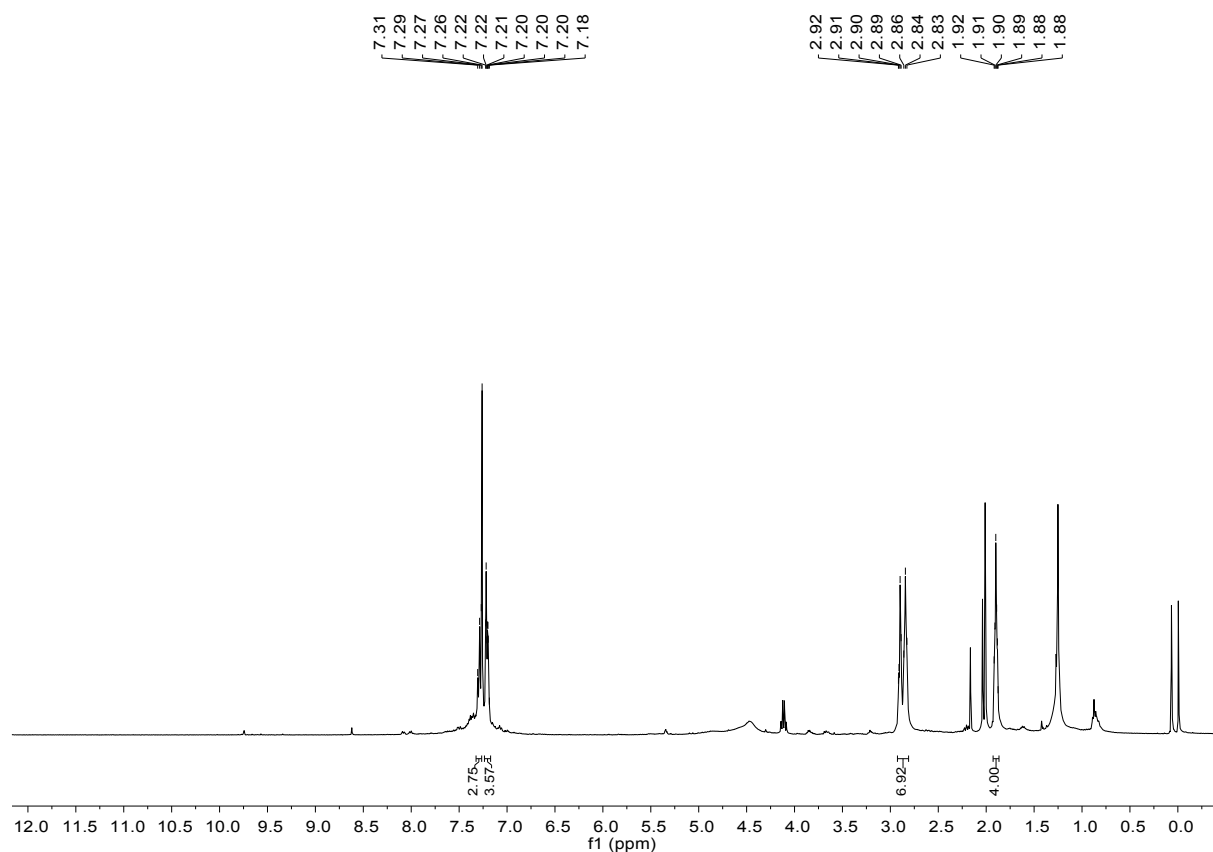

**d)** In the glove box, in an over-dried Schlenk tube were placed  $\text{NaBD}_4$  (0.0502 g, 1.2 mmol, 3.0 equiv.), pinacol (0.0473 g, 0.4 mmol, 2.0 equiv.) and super dry DCE (0.4 mL). A solution of iodine (0.1600 g, 0.63 mmol, 1.6 equiv.) in super dry DCE (0.4 mL) was added dropwise. The resulting mixture was stirred at room temperature for 2 h. Then the purified (*E*)-1-styrylpyrrolidine (35.1 mg, 0.2 mmol),  $\text{B}(\text{C}_6\text{F}_5)_3$  (5.1 mg, 0.01 mol),  $\text{H}_2\text{O}$  (7.2 mg, 0.4 mmol, 2.0 equiv.) were added. The resulting mixture was stirred at 80 °C for 3 h, and then allowed to room temperature. The solution was concentrated in *vacuo*. The crude yield and deuterium incorporation were detected from  $^1\text{H}$  NMR using 1,1,2,2-tetrachloroethane as an internal standard. (NMR yield: 49%, 99%D).

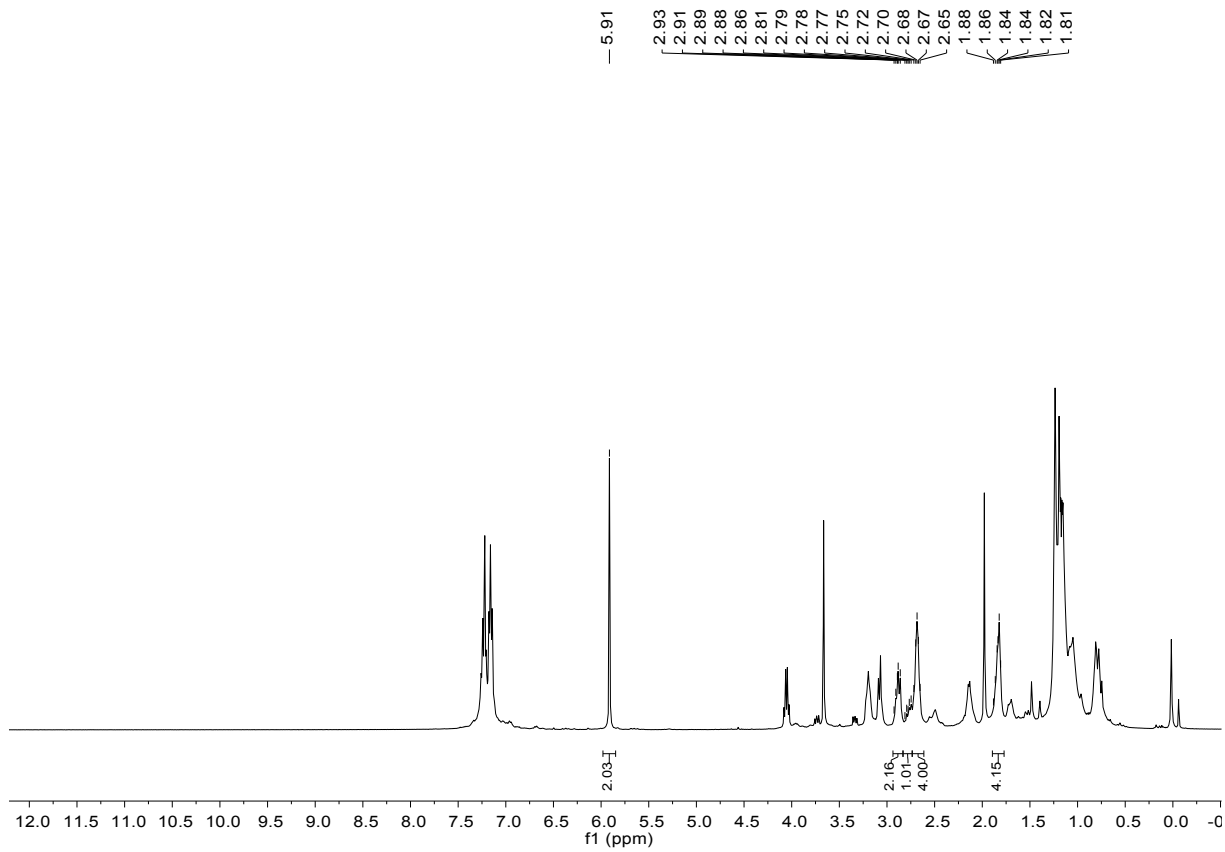

## Reference:

- [1] Xie, S.; Lopez, S.; Ramström, O.; Yan, M.D.; Houk, K. N. *J. Am. Chem. Soc.* **2015**, *137*, 2958.
- [2] Revelant, G.; Dunand, S.; Hesse, S.; Kirsch, G. *Synthesis*. **2011**, *18*, 2935.
- [3] Ruff, B.; Bräse, S.; O' Connor, S. *Tetrahedron Lett.* **2011**, *53*, 1071.
- [4] Tomoyasu, H.; Toshiaki, S.; Tian, Z. M.; Masaki, H.; Ryuji, U.; Kazuro, S.; Yoshihiro, H.; Satoshi, O. *Heterocycles*, **2000**, *53*, 777.
- [5] Masatoshi, E.; Hideo, T. *Eur. J. Org. Chem.* **2017**, 2379.
- [6] Zou, L. H.; Zhu, H.; Zhu, S.; Shi, K.; Yan, C.; Li, P. G. *J. Org. Chem.* **2019**, *84*, 12301.
- [7] Chernyak, N.; Buchwald, S. *J. Am. Chem. Soc.* **2012**, *134*, 12466.
- [8] Wei, D.; Buhaibeh, R.; Canacband, Y.; Sortais, J.B. *Chem. Commun.* **2020**, *56*, 11617.
- [9] Winterton, S.; Ready, J. *Org. Lett.* **2016**, *18*, 2608.
- [10] Kerkovius, J.; Kerr, M. *J. Am. Chem. Soc.* **2018**, *140*, 8415.
- [11] Davin, L.; Hernán-Gómez, A.; McLaughlin, C.; Kennedy, A.; McLellan, R.; Hevia, E. *Dalton Trans.* **2019**, *48*, 8122.
- [12] Beller, M.; Breindl, C.; Riermeier, T.; Tillack, A. *J. Org. Chem.* **2001**, *66*, 1403.
- [13] Vögerl, K.; Ong, D. N.; Bracher, F. *Synthesis*, **2018**, *50*, 1323.
- [14] Oss, G.; de Vos, S.; Kevin N. H.; Luc, J.; Harper; Nguyen, T. *J. Org. Chem.* **2018**, *83*, 1000.
- [15] Bahri, J.; Blicck, R.; Jamoussi, B.; Taillefer, M.; Monnier, F. *Chem. Commun.* **2015**, *51*, 11210.
- [16] Ryosuke, S.; Koji, H.; Tetsuya, S.; Masahiro, M. *Chem. Lett.* **2013**, *42*, 1128.
- [17] Zhu, F.; Wang, Z. X.; *Adv. Synth. Catal.* **2013**, *355*, 3694.

- [18] Beller, M.; Trauthwein, H.; Eichberger, M.; Breindl, C.; Herwig, J.; Müller, T. E.; Thiel, O. R. *Chem. Eur. J.* **1999**, *5*, 4.
- [19] Camerino, M.; Zhong, N.; Dong, A. P.; Dickson, B.; James, L.; Baughman, B.; Norris, J.; Kireev, D.; Janzen, W.; Arrowsmith, C.; Frye, F. *Med. Chem. Commun.* **2013**, *4*, 1501.
- [20] Labes, R.; Mateos, C.; Battilocchio, C.; Chen, Y.D.; Dingwall, P.; Cumming, G.; Rincón, J.; Nieves-Remacha, M. J.; Ley, S. *Green Chem.* **2019**, *21*, 59.
- [21] Muriel Billamboz, Floriane Mangin, Nicolas Drillaud, Carole Chevrin-Villette, Estelle Banaszak-Léonard and Christophe Len. *J. Org. Chem.* **2014**, *79*, 493.
- [22] Lator, A.; Gaignard, Q.; Merel, D.; Lohier, J. F.; Gaillard, S.; Poater, A.; Renaud, J. L. *J. Org. Chem.* **2019**, *84*, 6813.
- [23] Zhu, S. L.; Niljianskul, N.; Buchwald, S. *Nature Chemistry.* **2016**, *8*, 144.
- [24] Liu, H.; Yang, D.; Wang, D. L.; Wang, P.; Lu, Y.; Giangb, V. T.; Liu, Y. *Chem. Commun.* **2018**, *54*, 7979.



# <sup>1</sup>H and <sup>13</sup>C NMR Spectra:

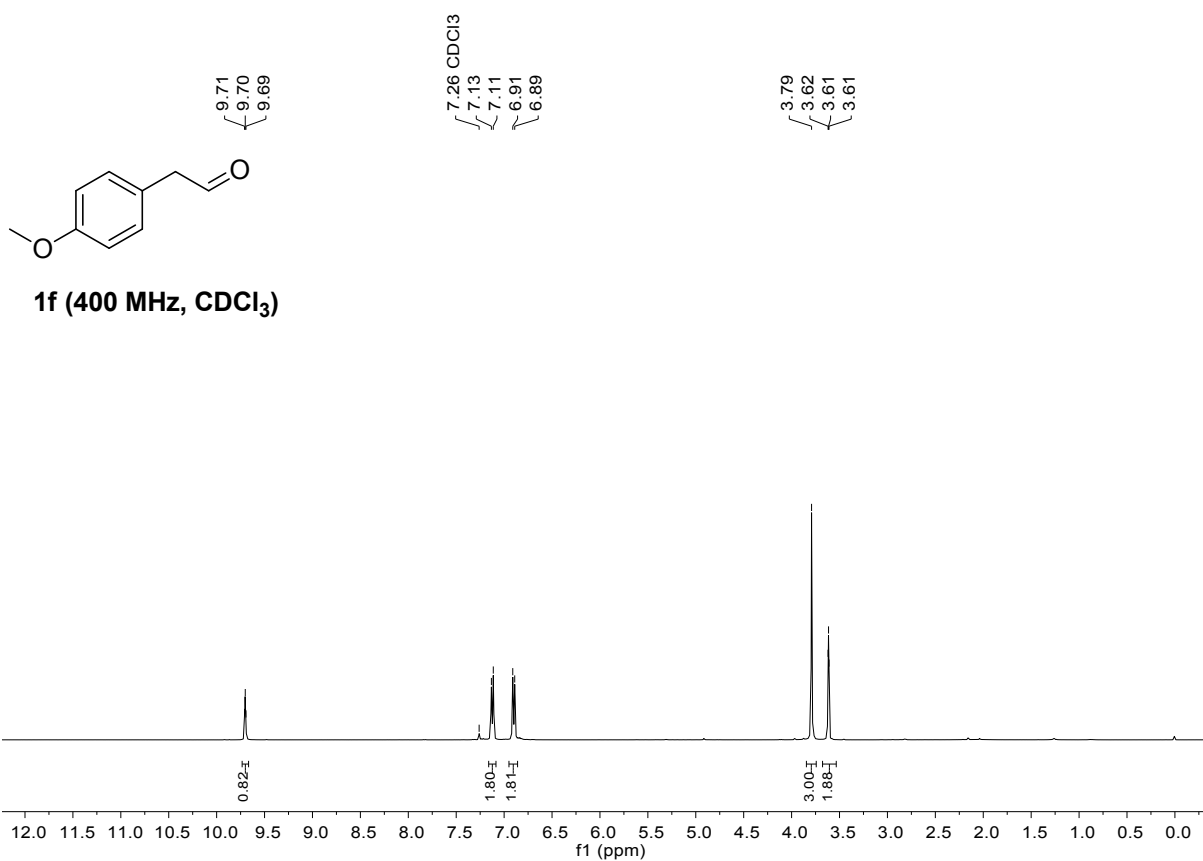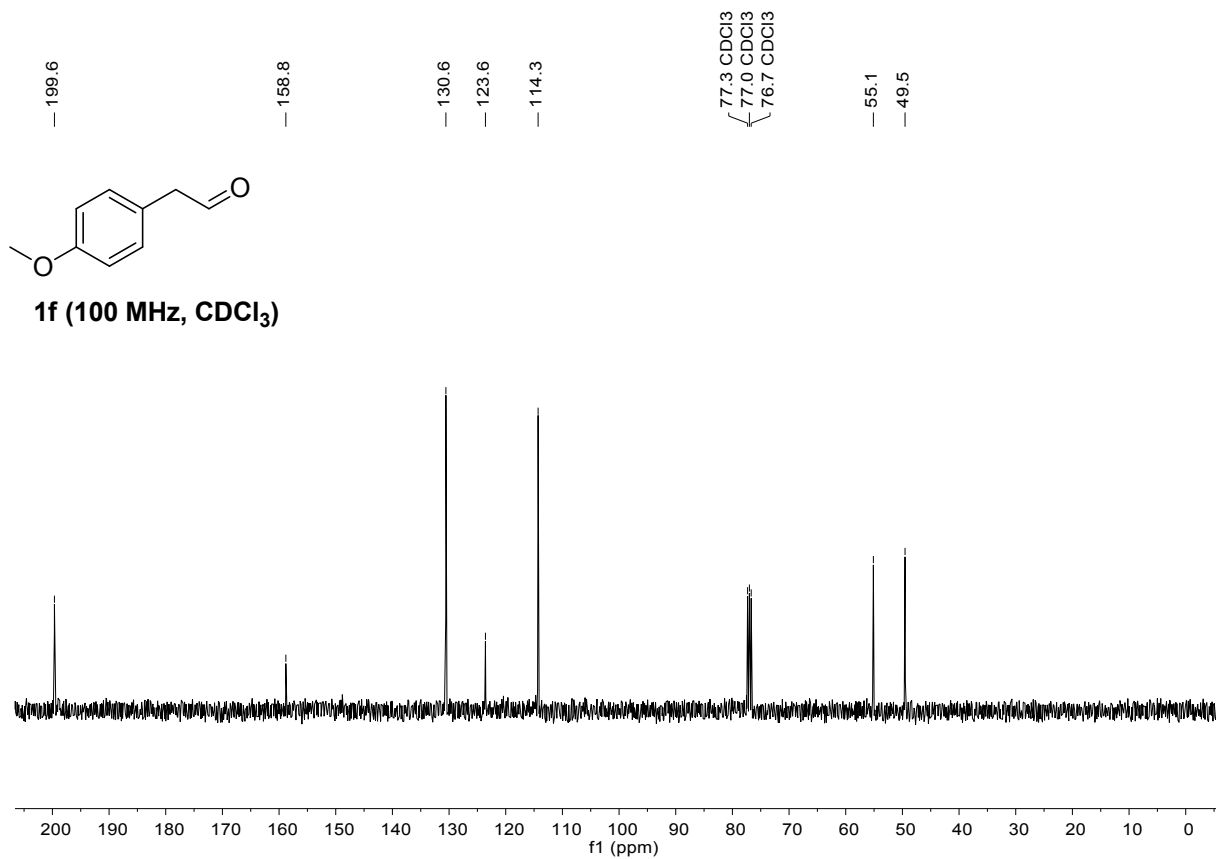

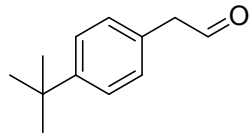

**1e (400 MHz, CDCl<sub>3</sub>)**

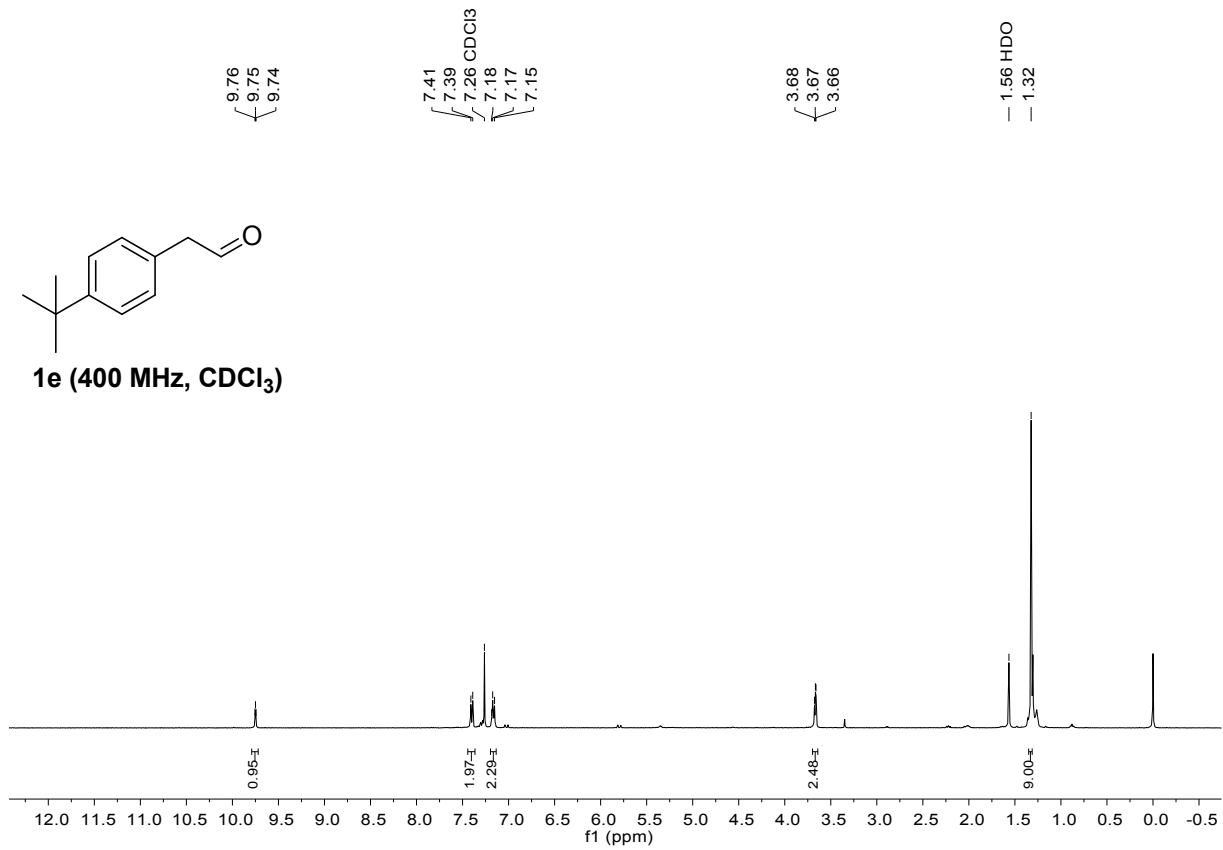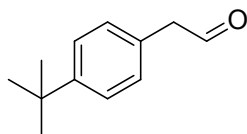

**1e (100 MHz, CDCl<sub>3</sub>)**

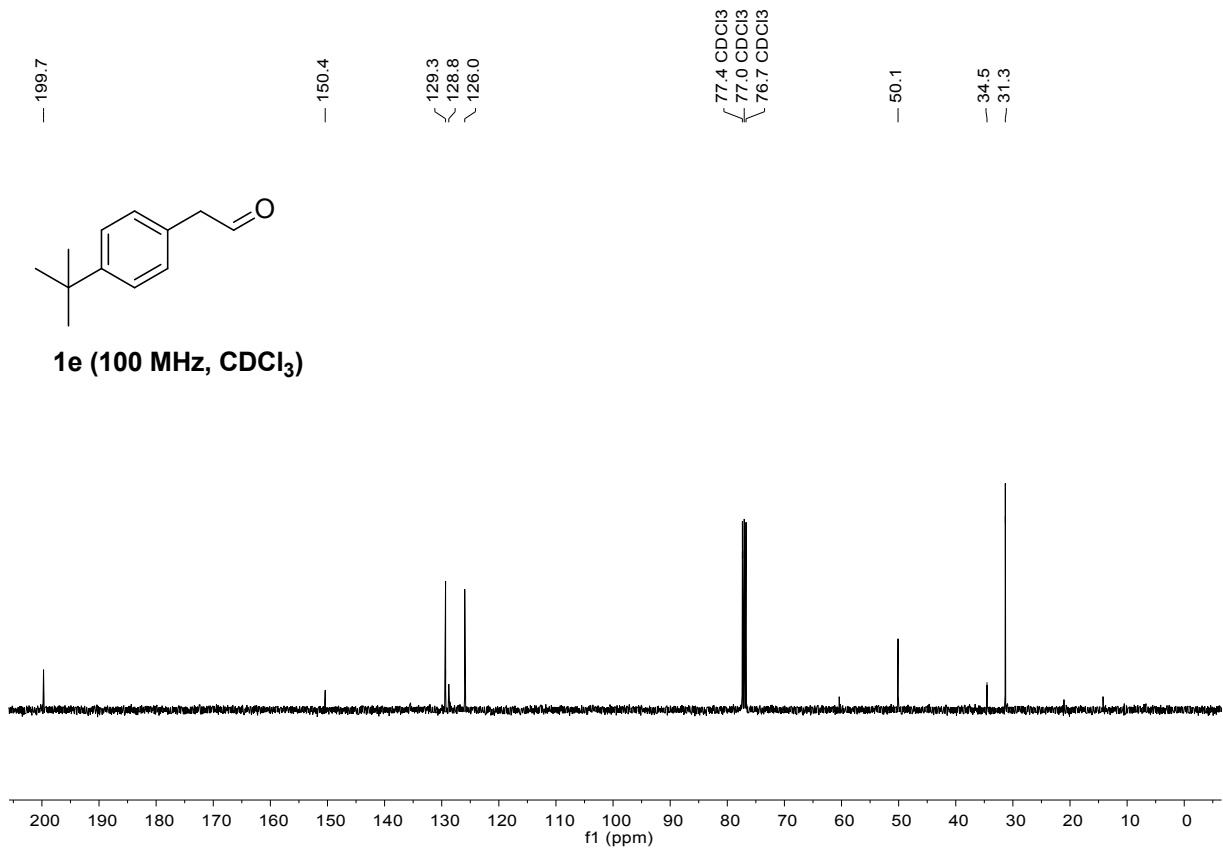

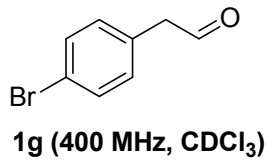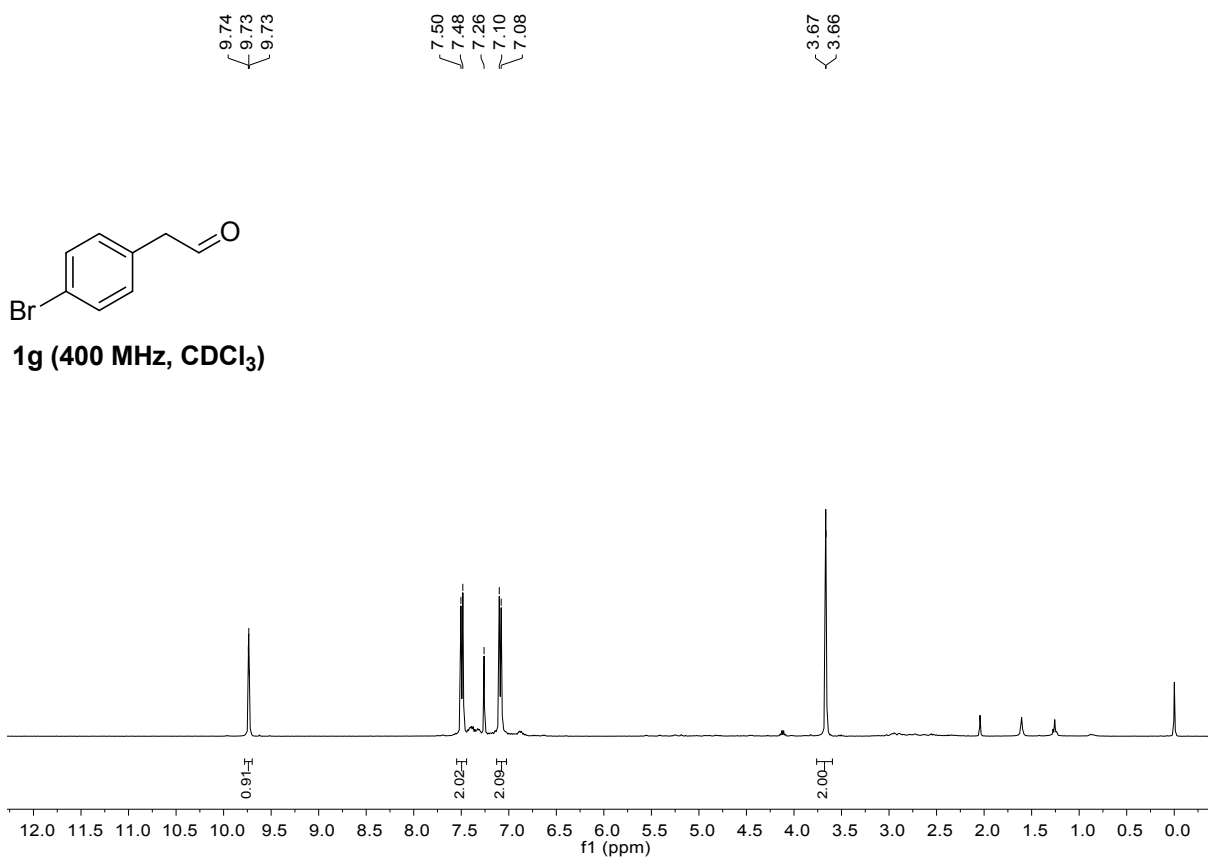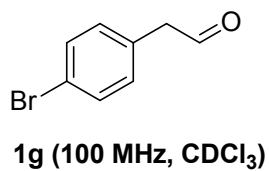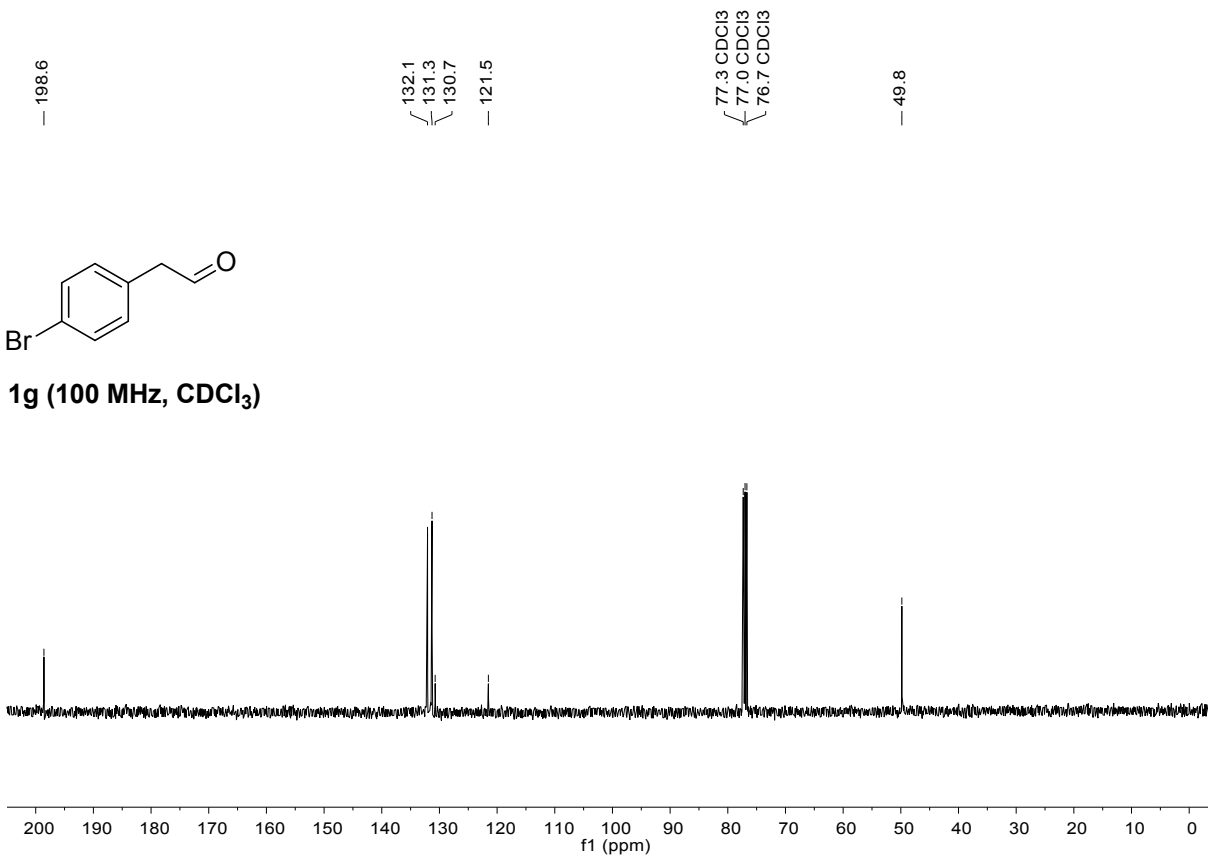



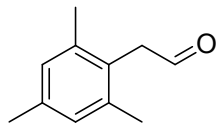

**1i (400 MHz, CDCl<sub>3</sub>)**

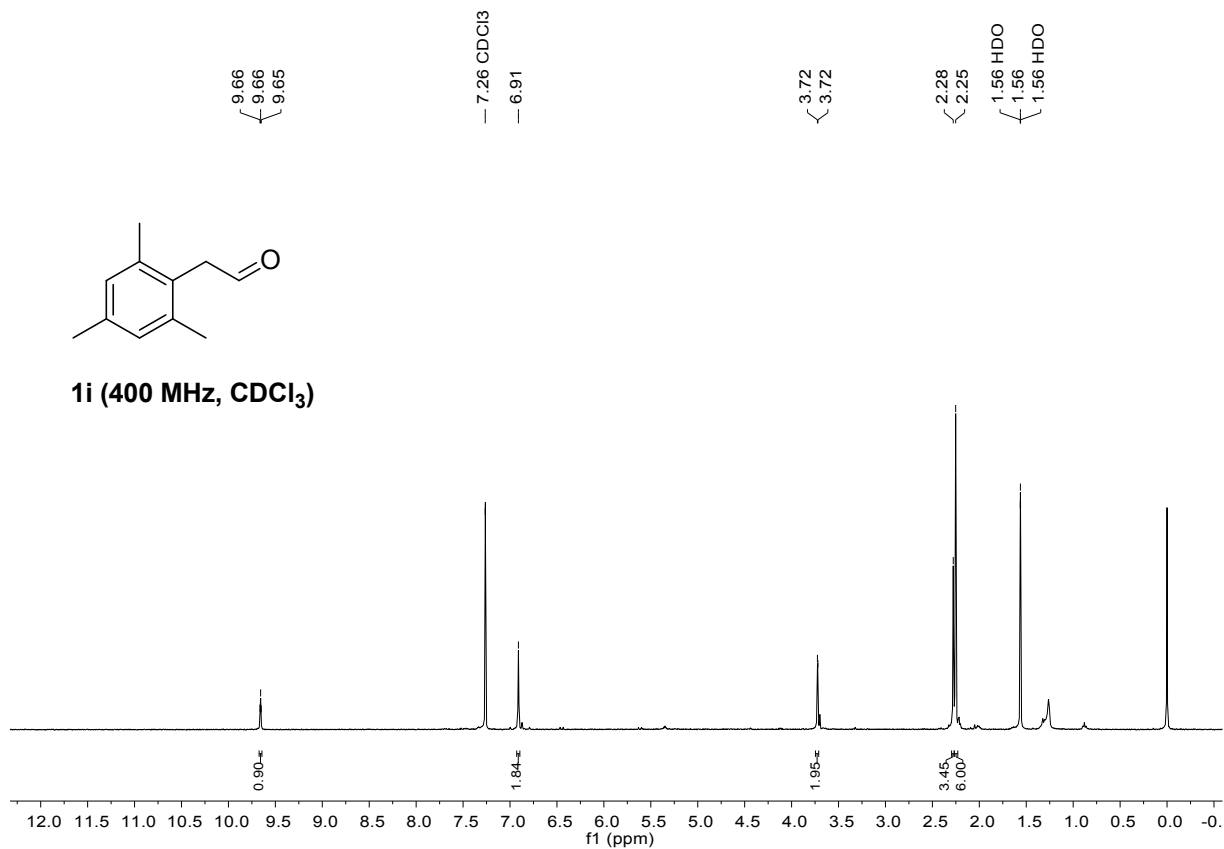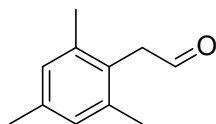

**1i (100 MHz, CDCl<sub>3</sub>)**

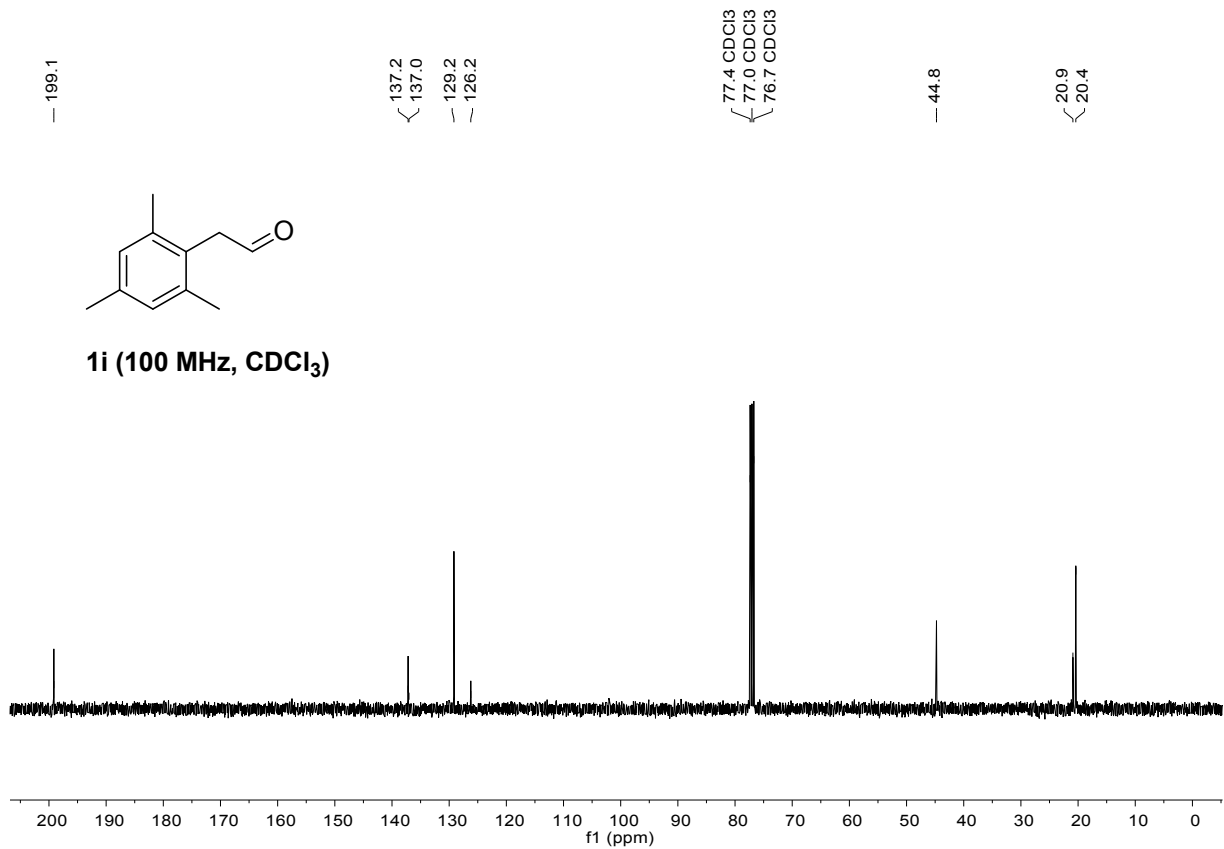

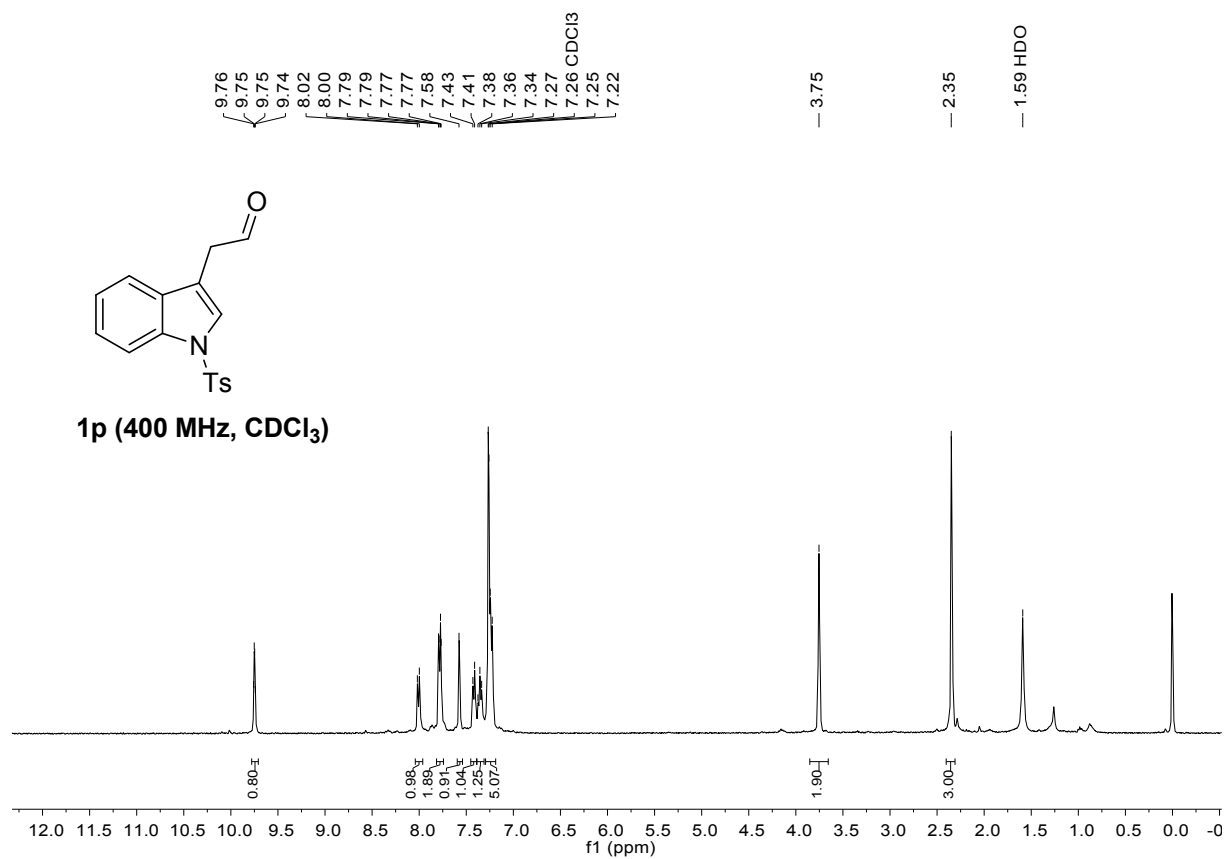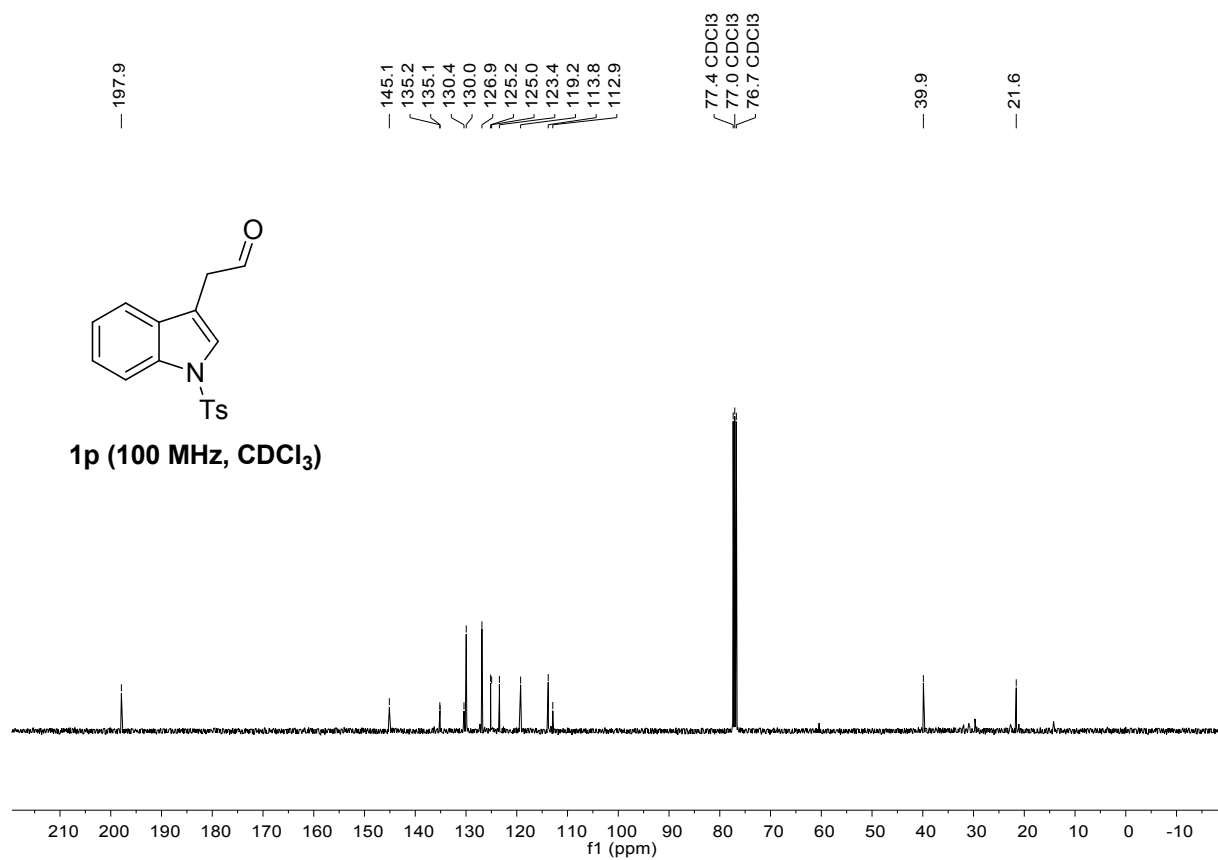

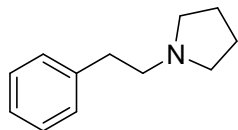

3aa (400 MHz, CDCl<sub>3</sub>)

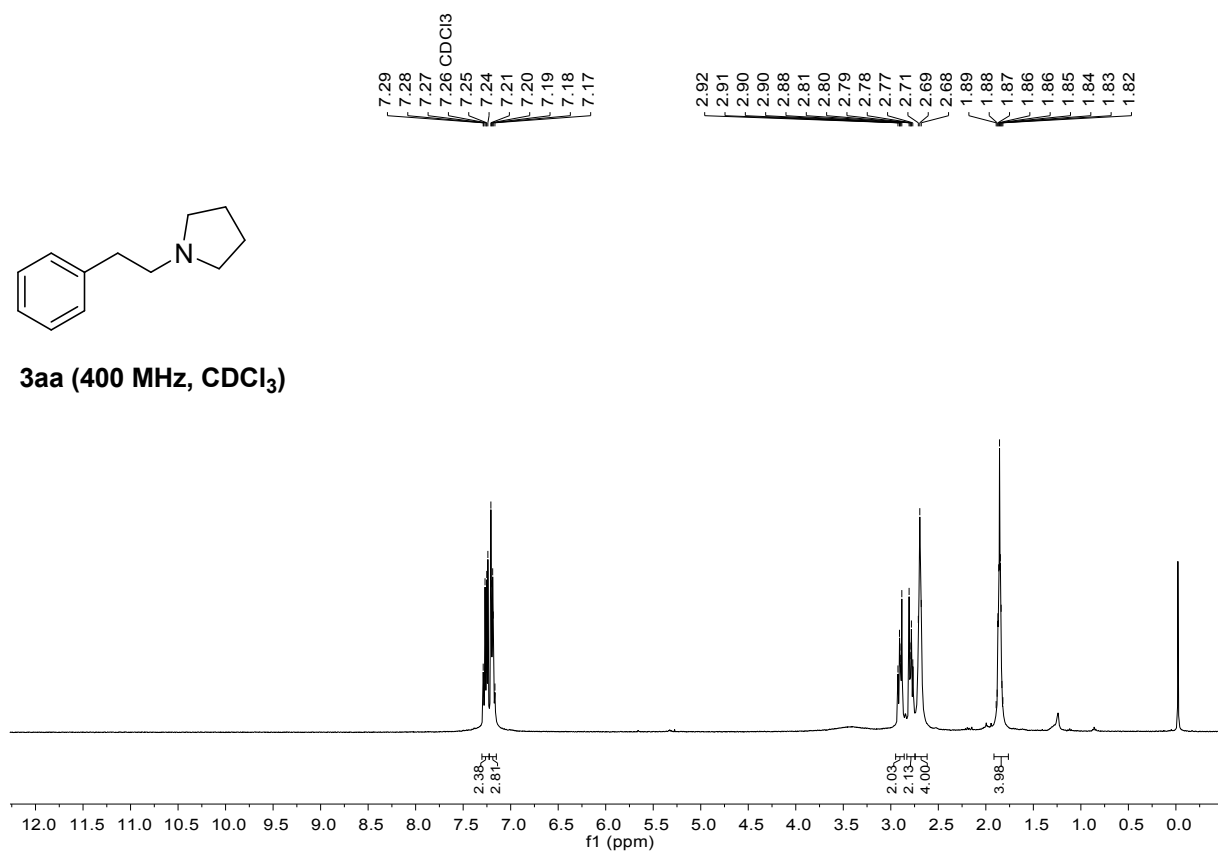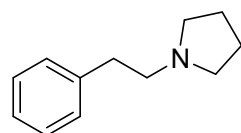

3aa (100 MHz, CDCl<sub>3</sub>)

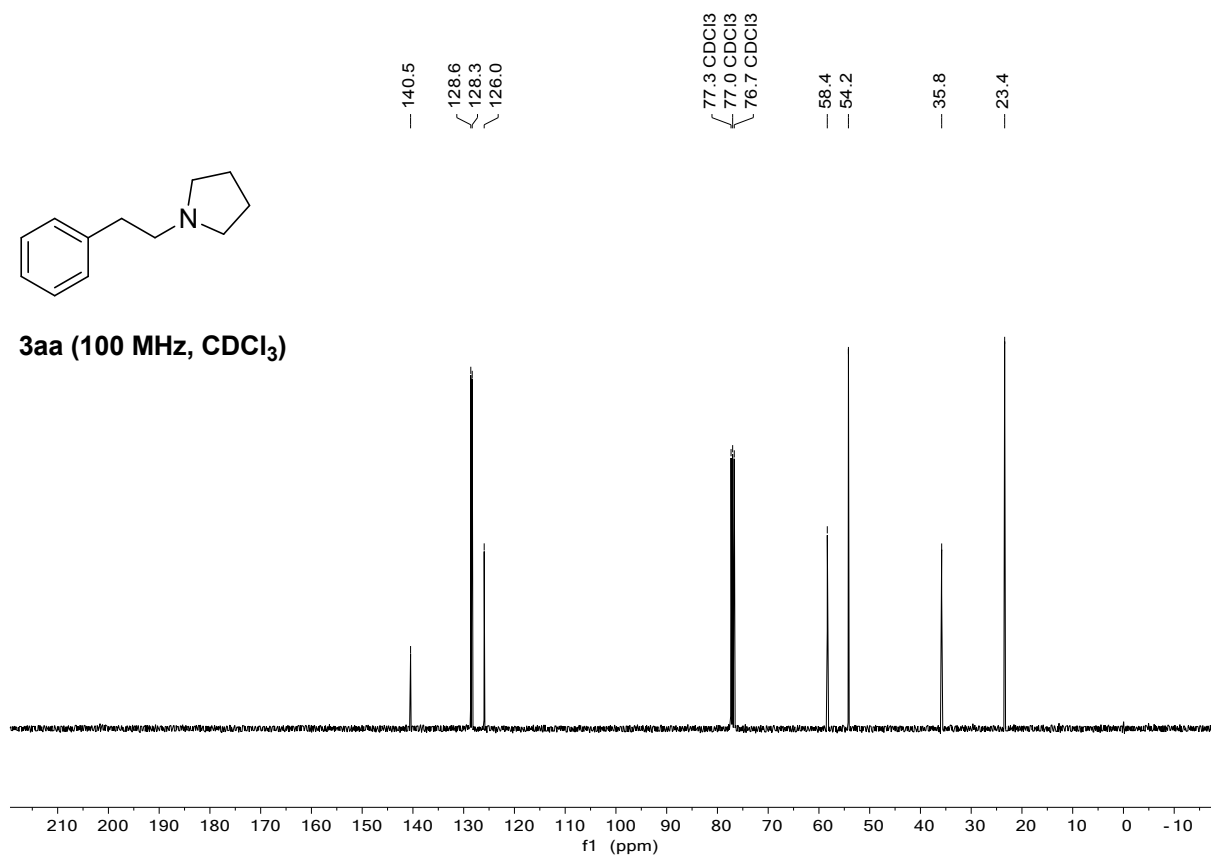

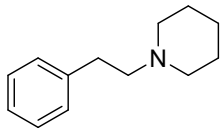

**3ab (400 MHz, CDCl<sub>3</sub>)**

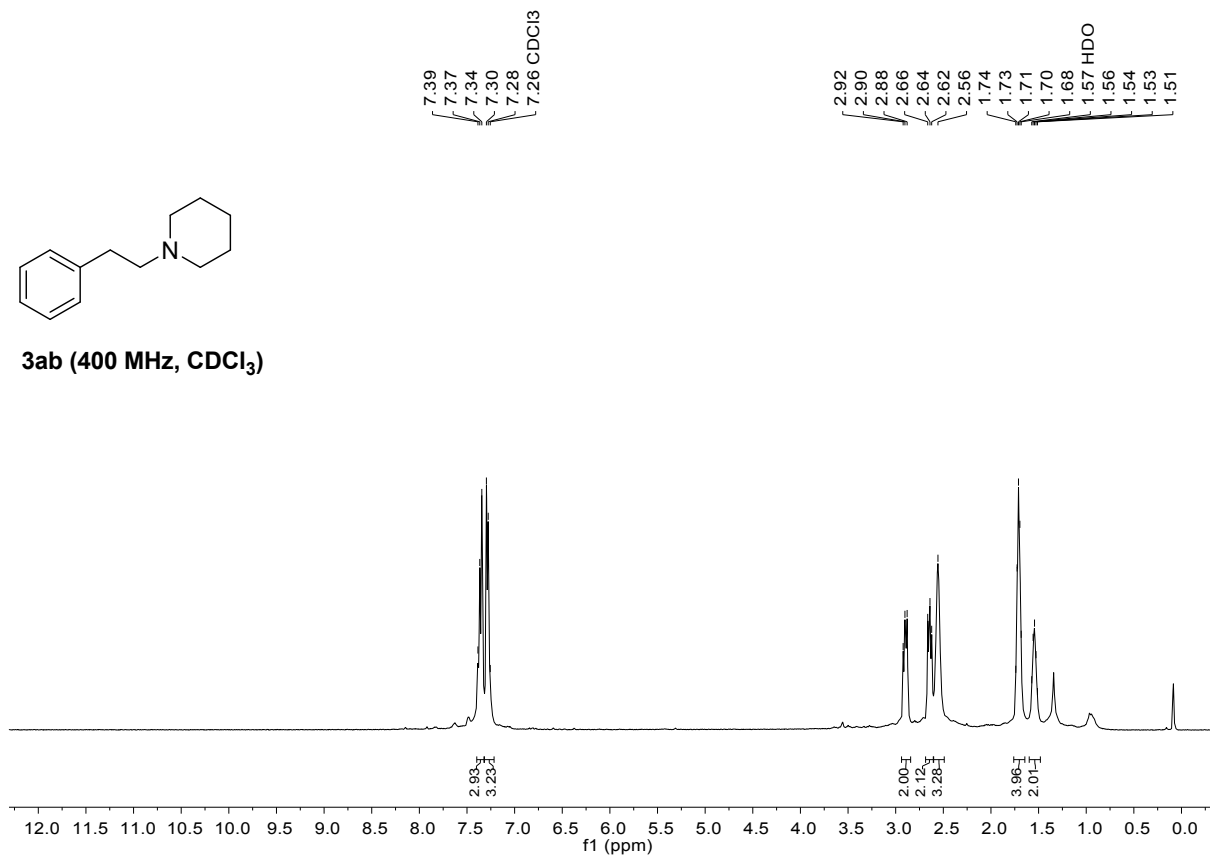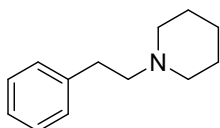

**3ab (100 MHz, CDCl<sub>3</sub>)**

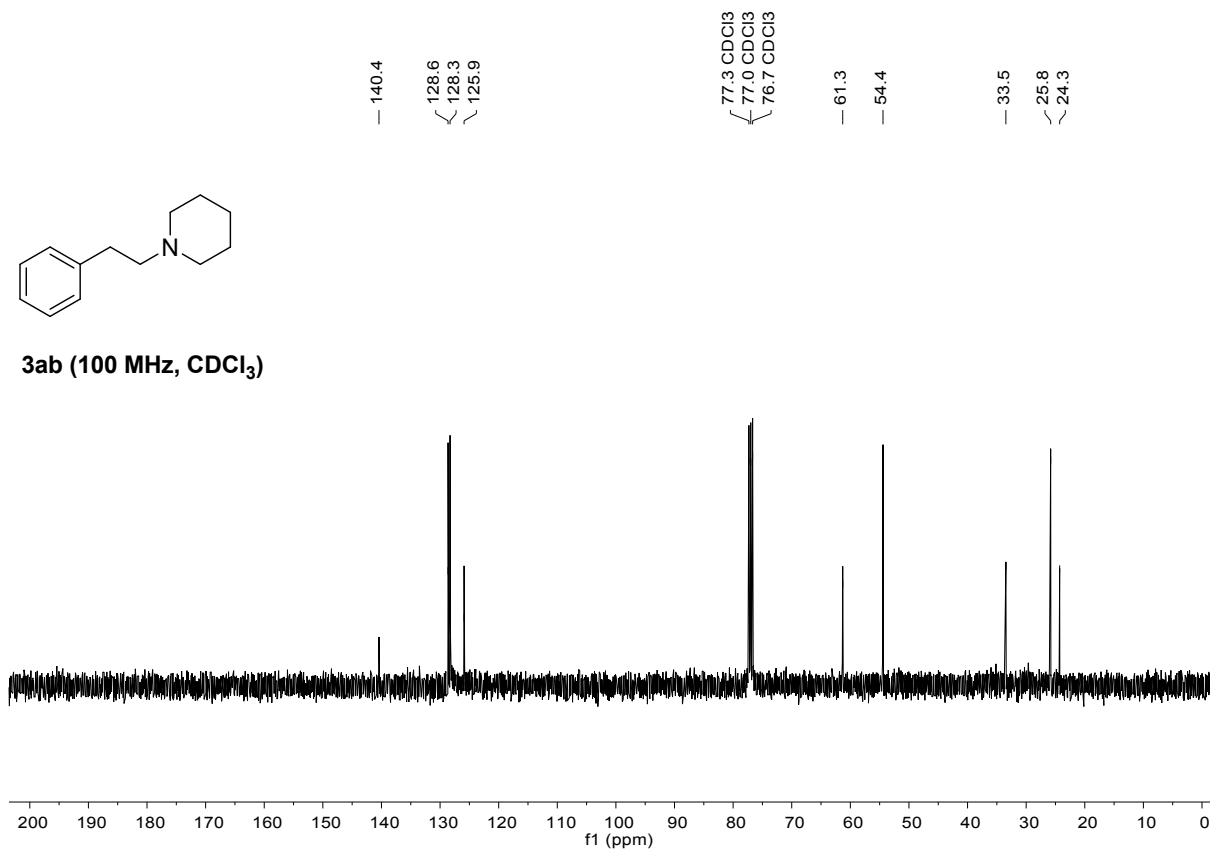

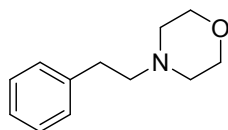

**3ac (400 MHz, CDCl<sub>3</sub>)**

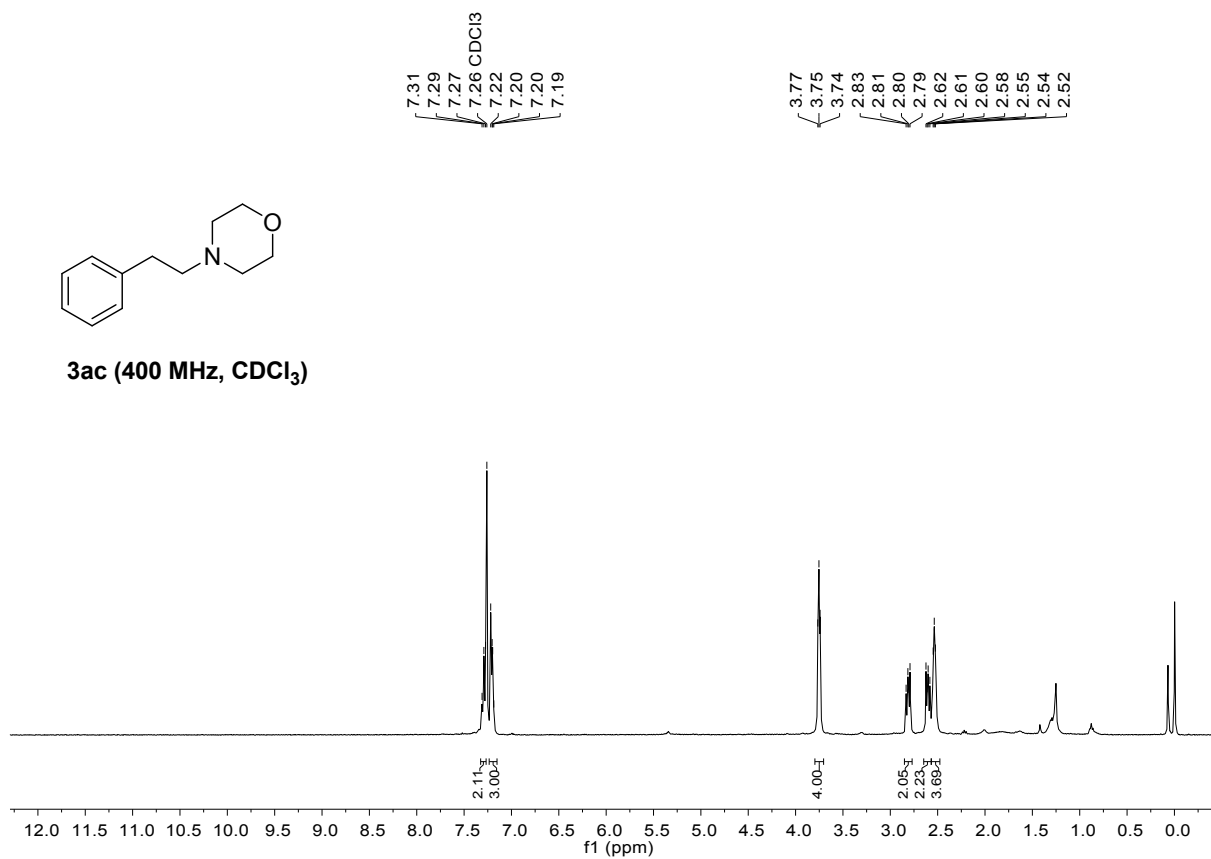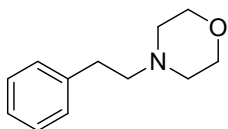

**3ac (100 MHz, CDCl<sub>3</sub>)**

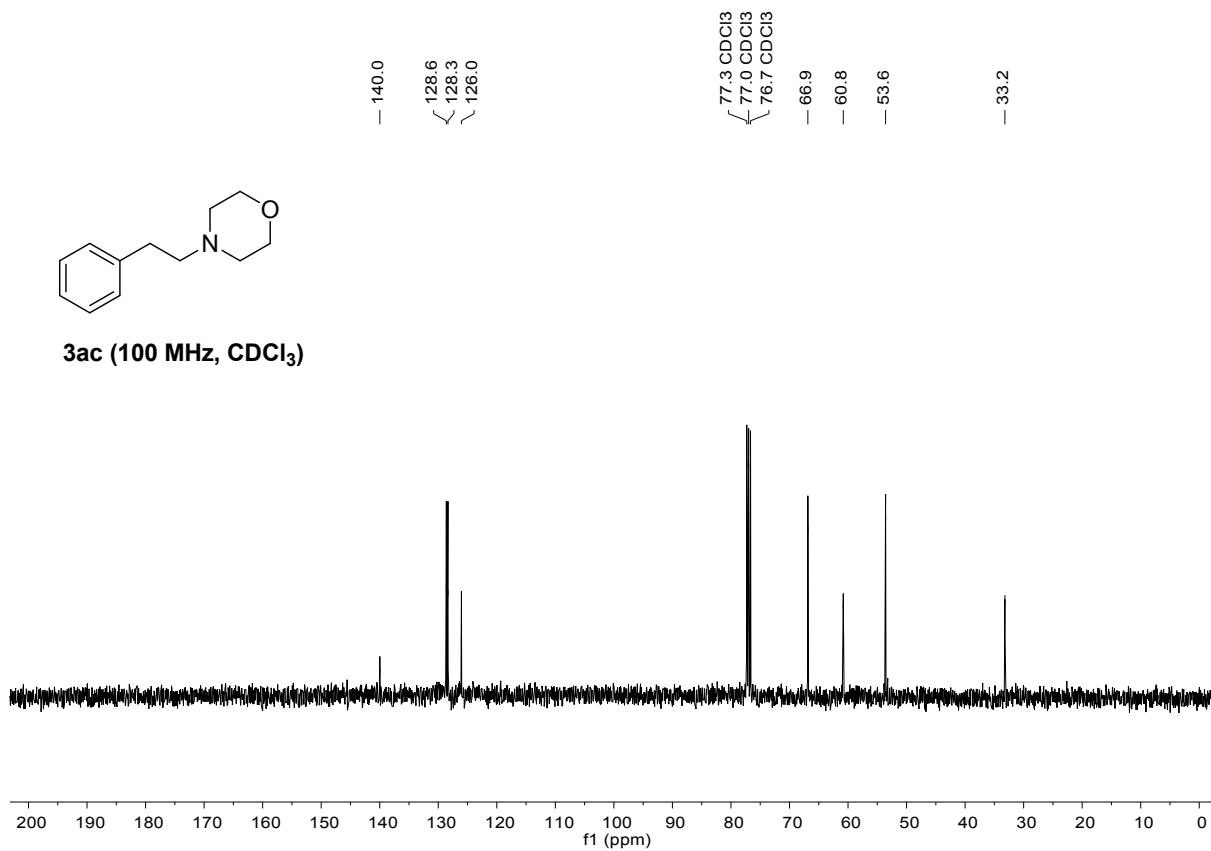

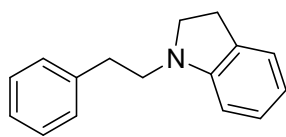

**3ad (400 MHz, CDCl<sub>3</sub>)**

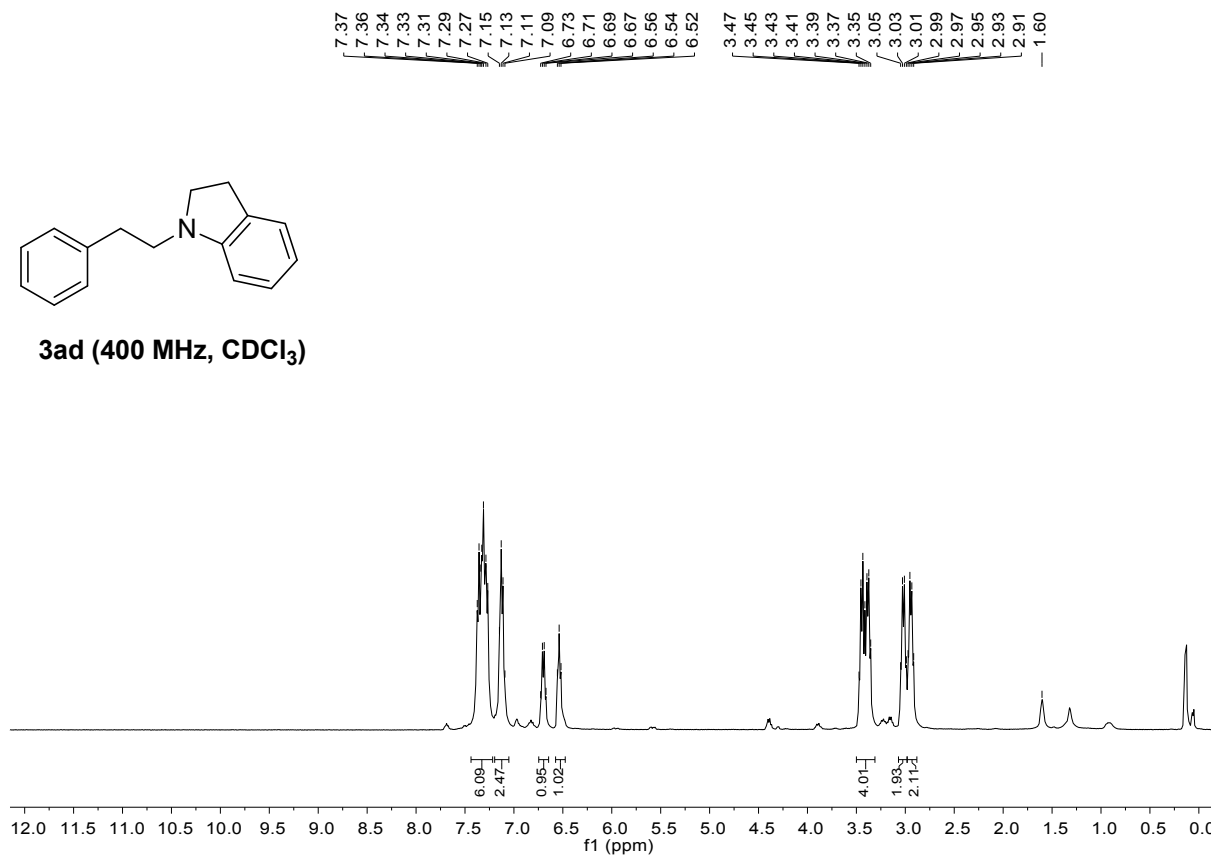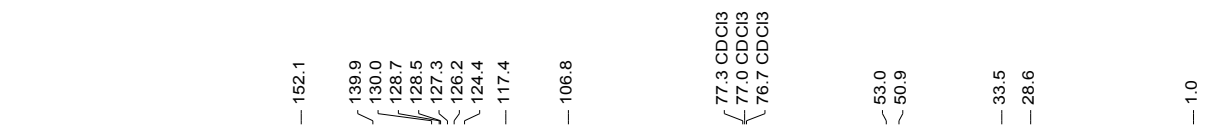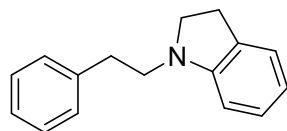

**3ad (100 MHz, CDCl<sub>3</sub>)**

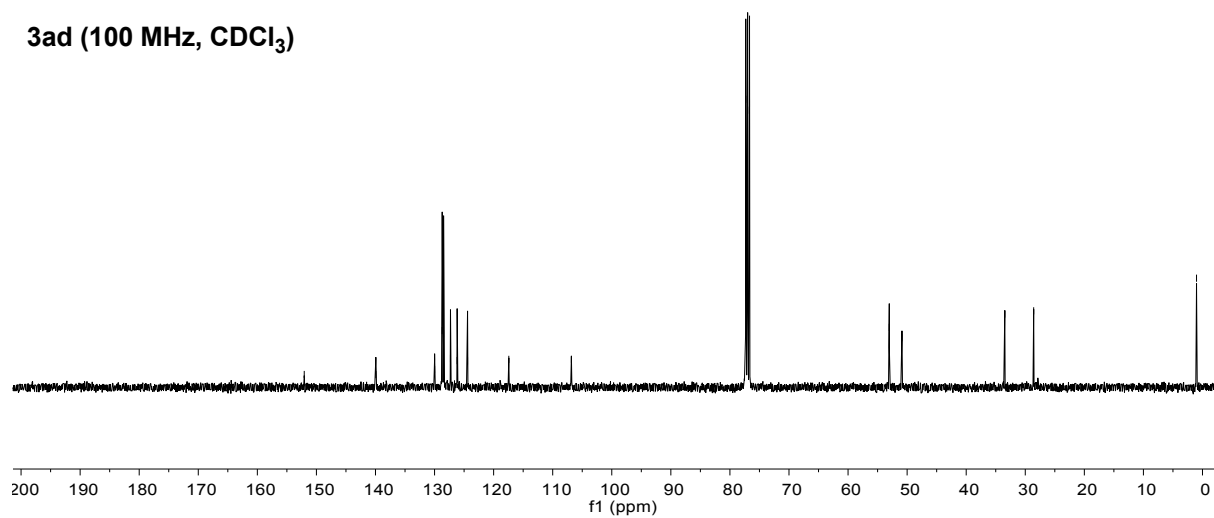

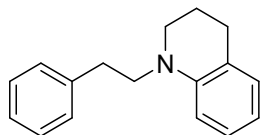

**3ae (400 MHz, CDCl<sub>3</sub>)**

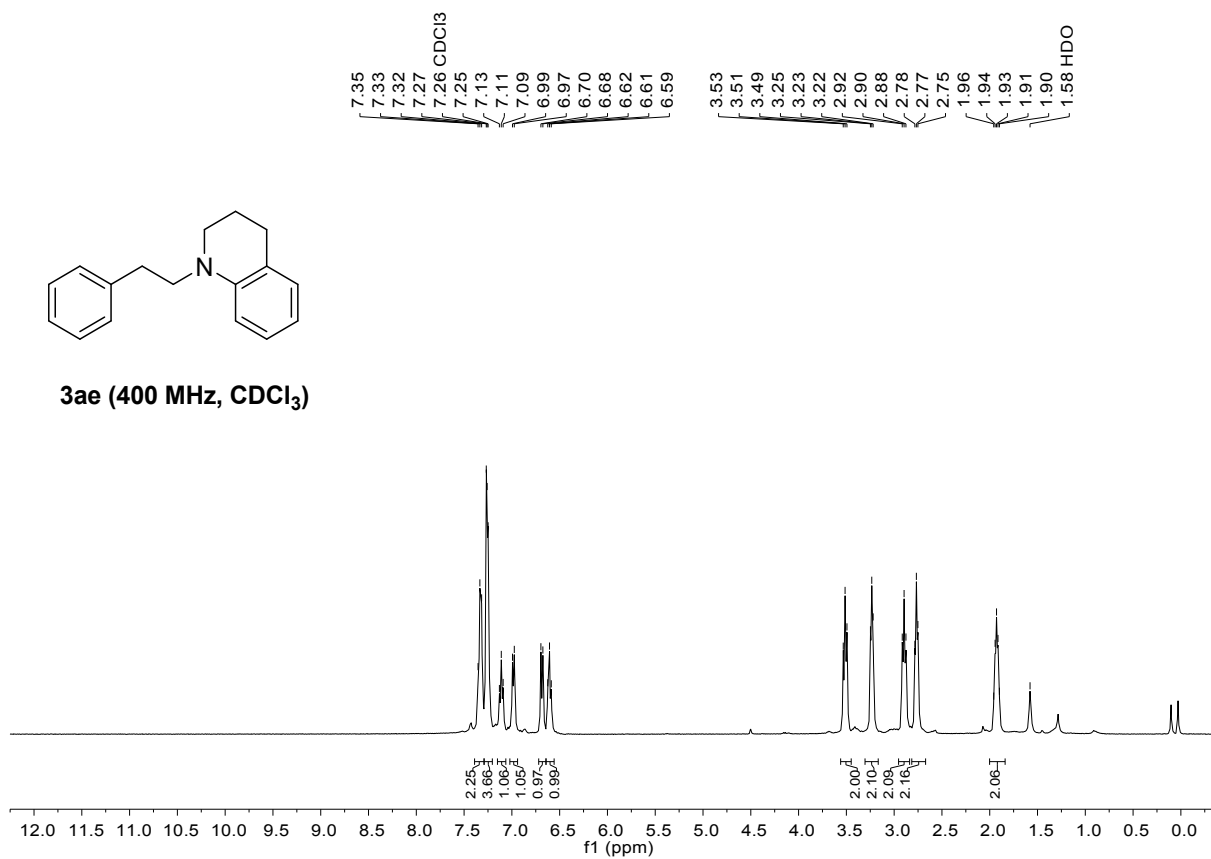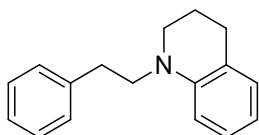

**3ae (100 MHz, CDCl<sub>3</sub>)**

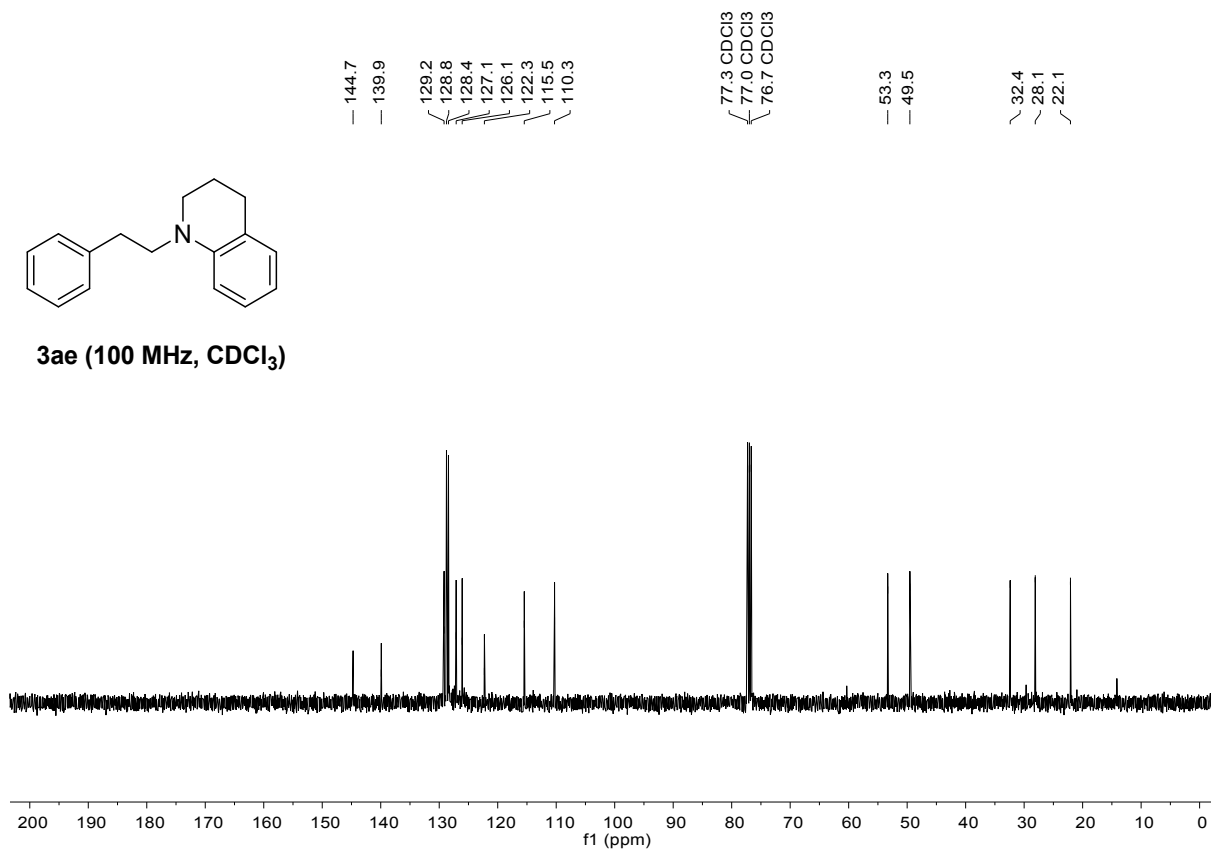

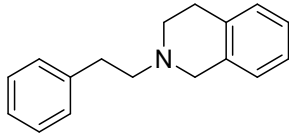

**3af (400 MHz, CDCl<sub>3</sub>)**

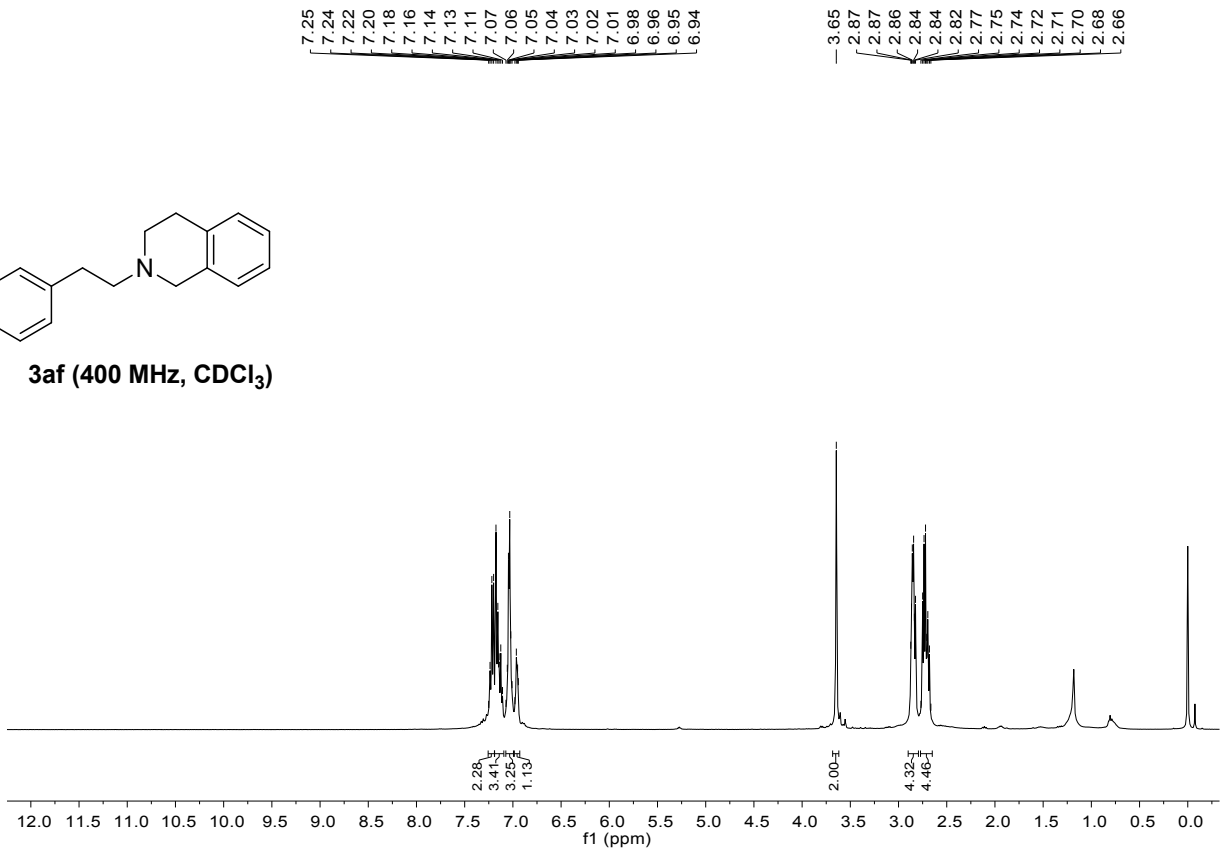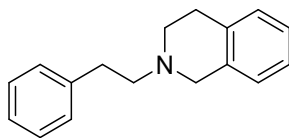

**3af (100 MHz, CDCl<sub>3</sub>)**

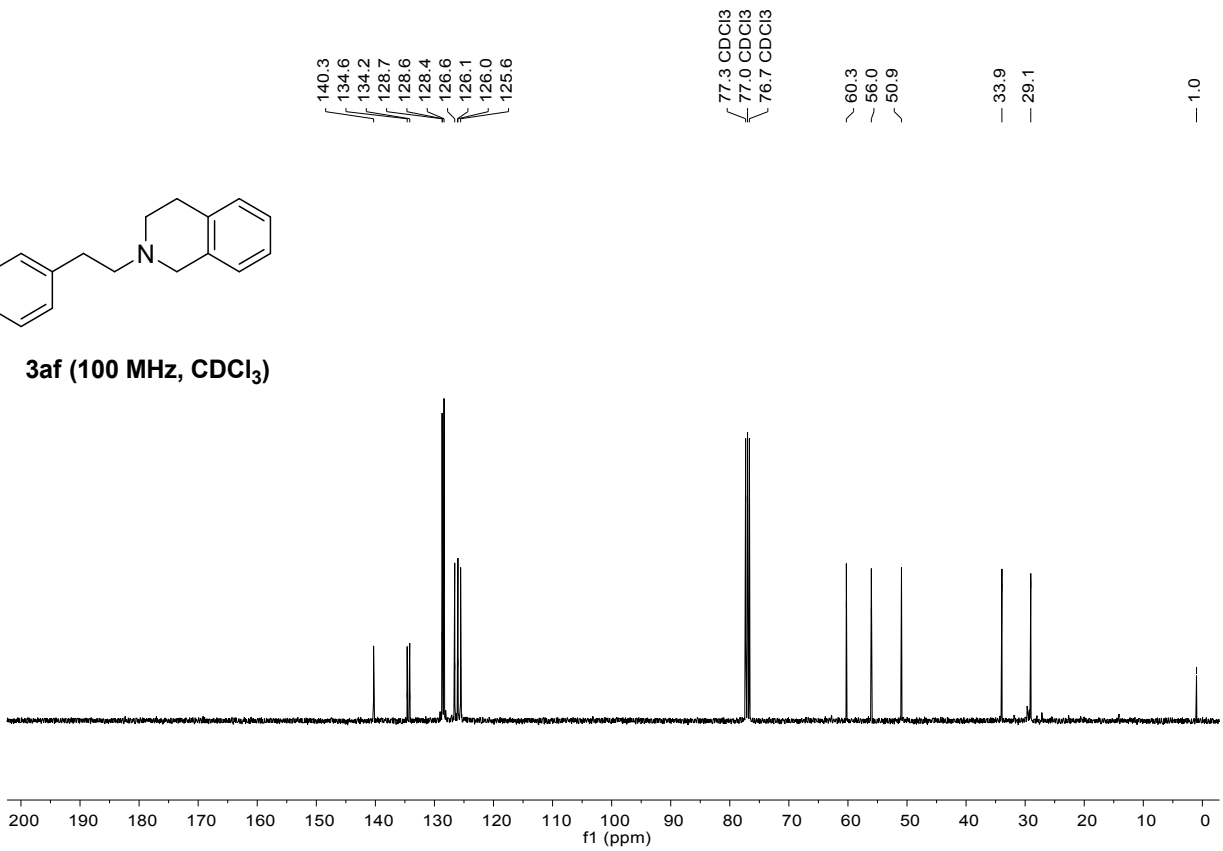



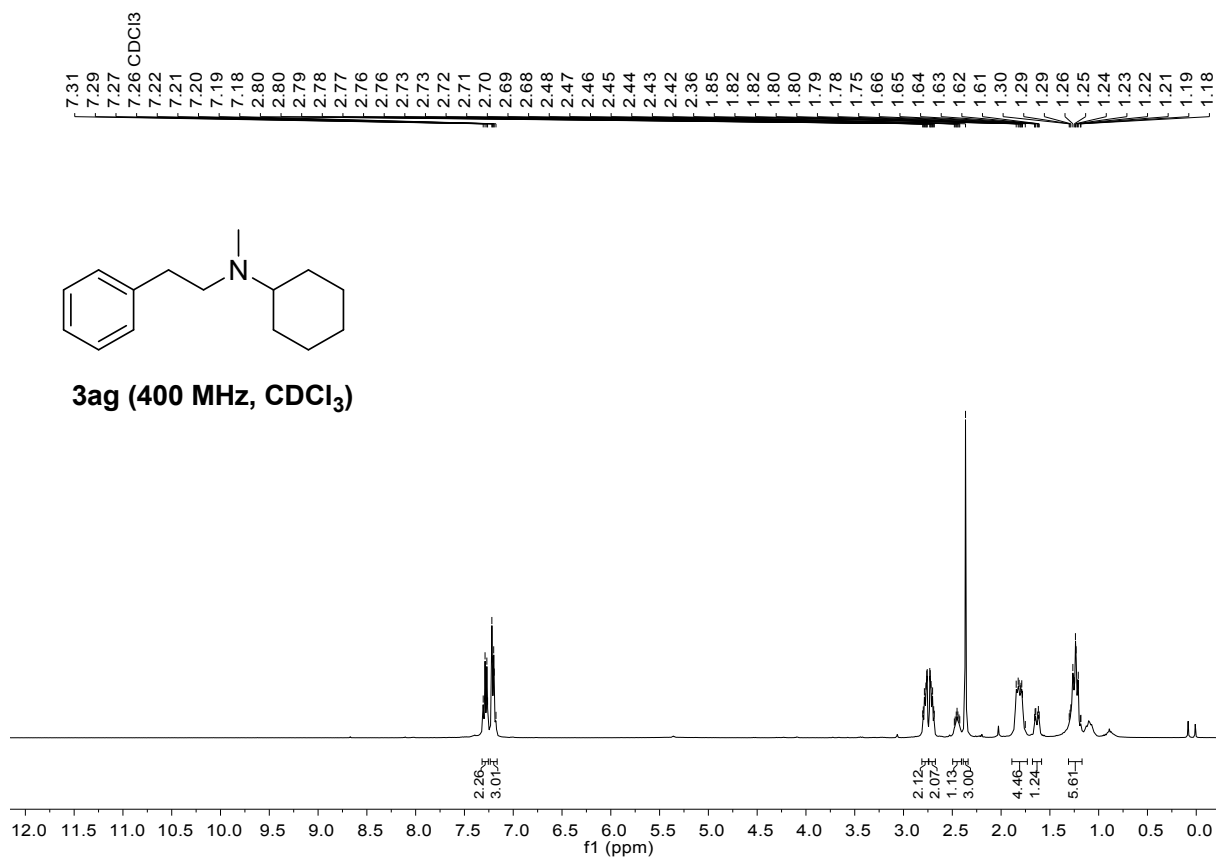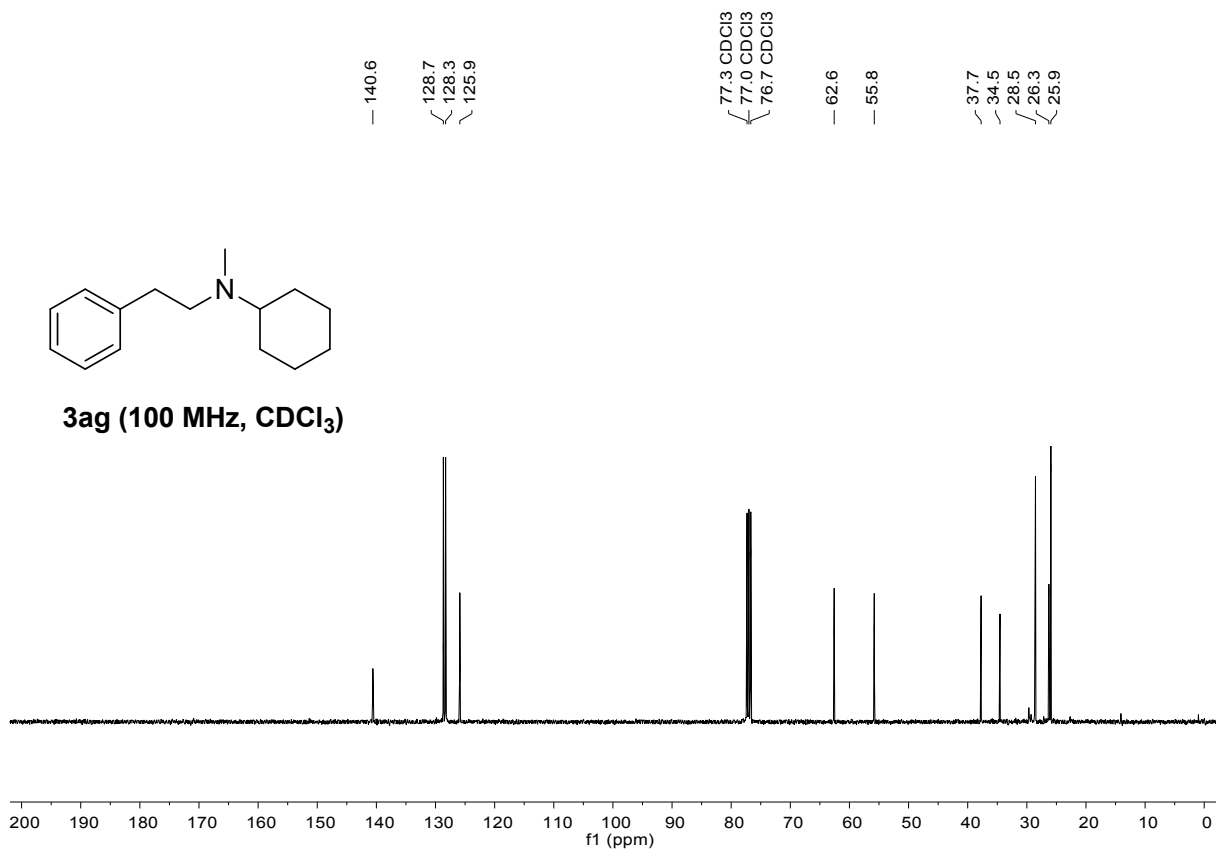

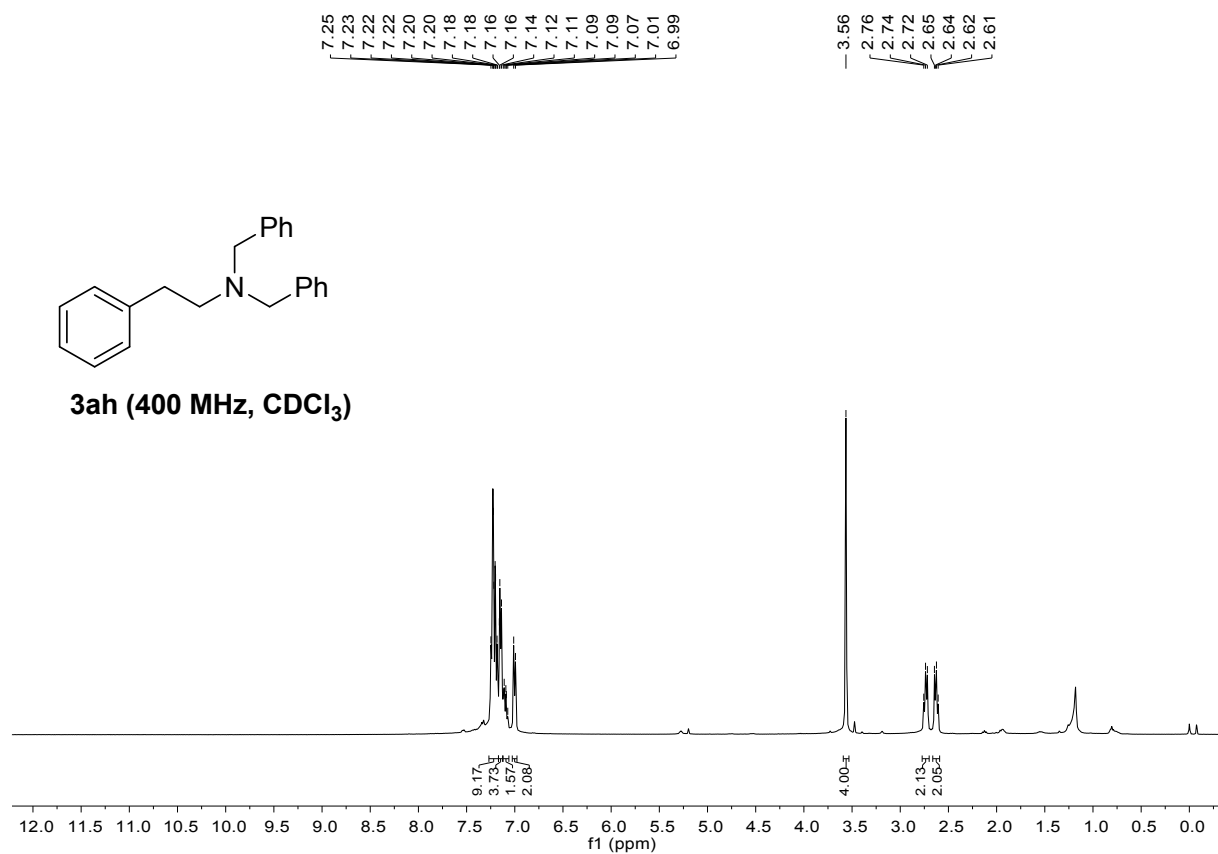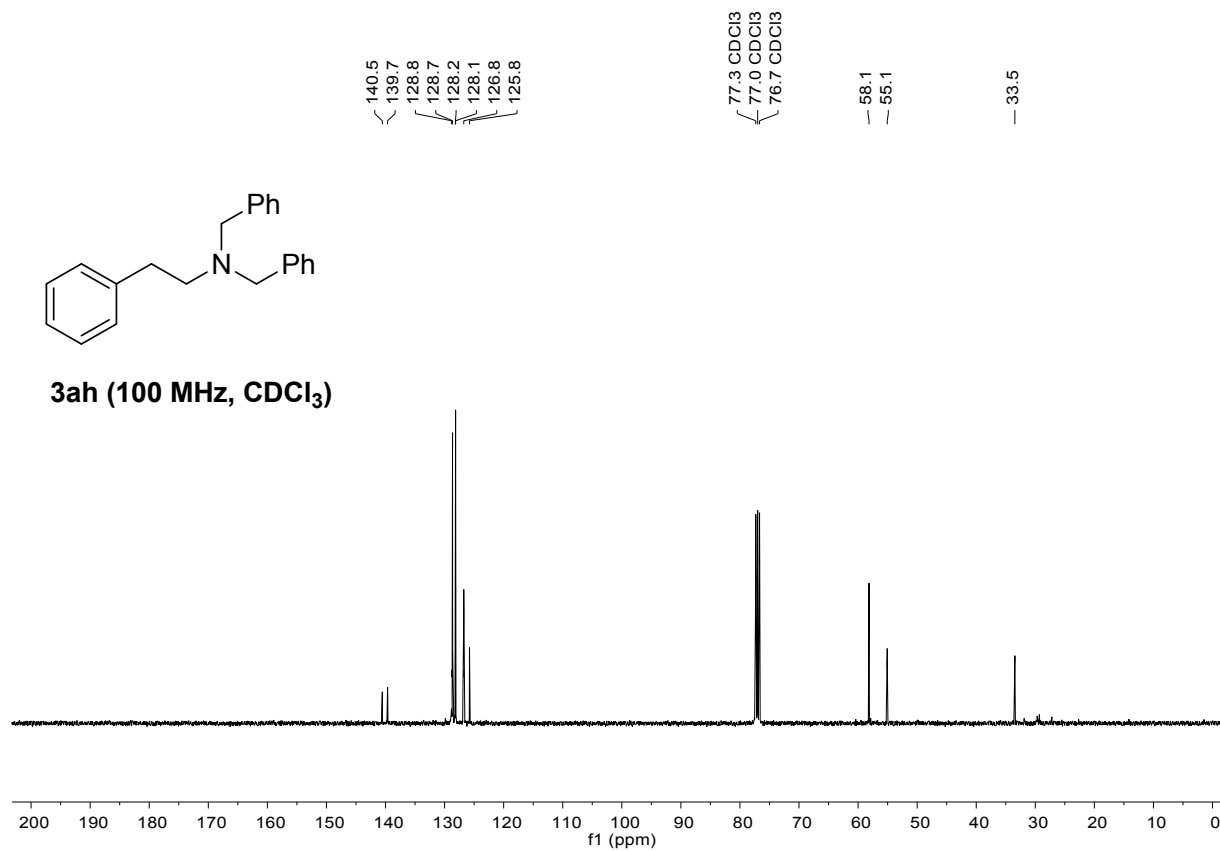

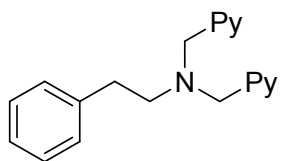

**3ai (400 MHz, CDCl<sub>3</sub>)**

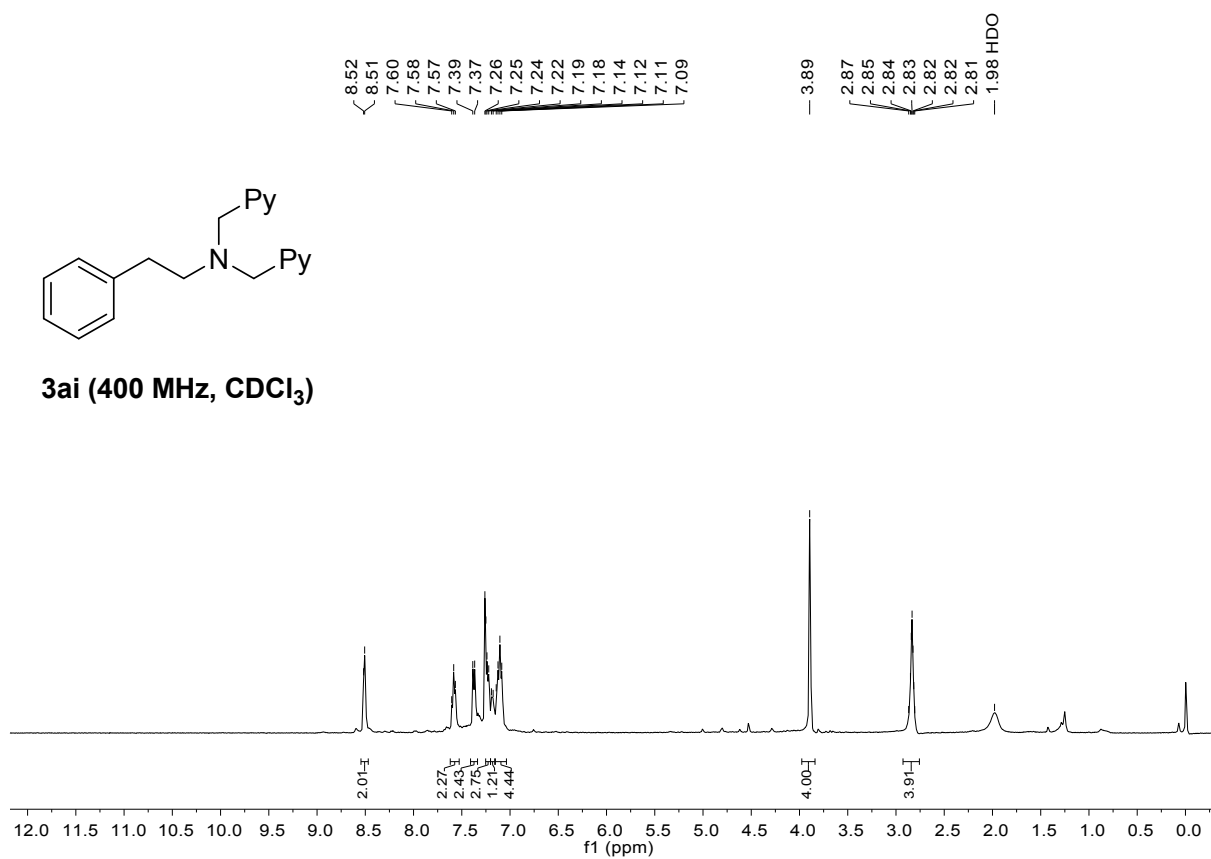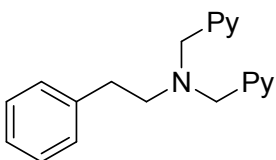

**3ai (100 MHz, CDCl<sub>3</sub>)**

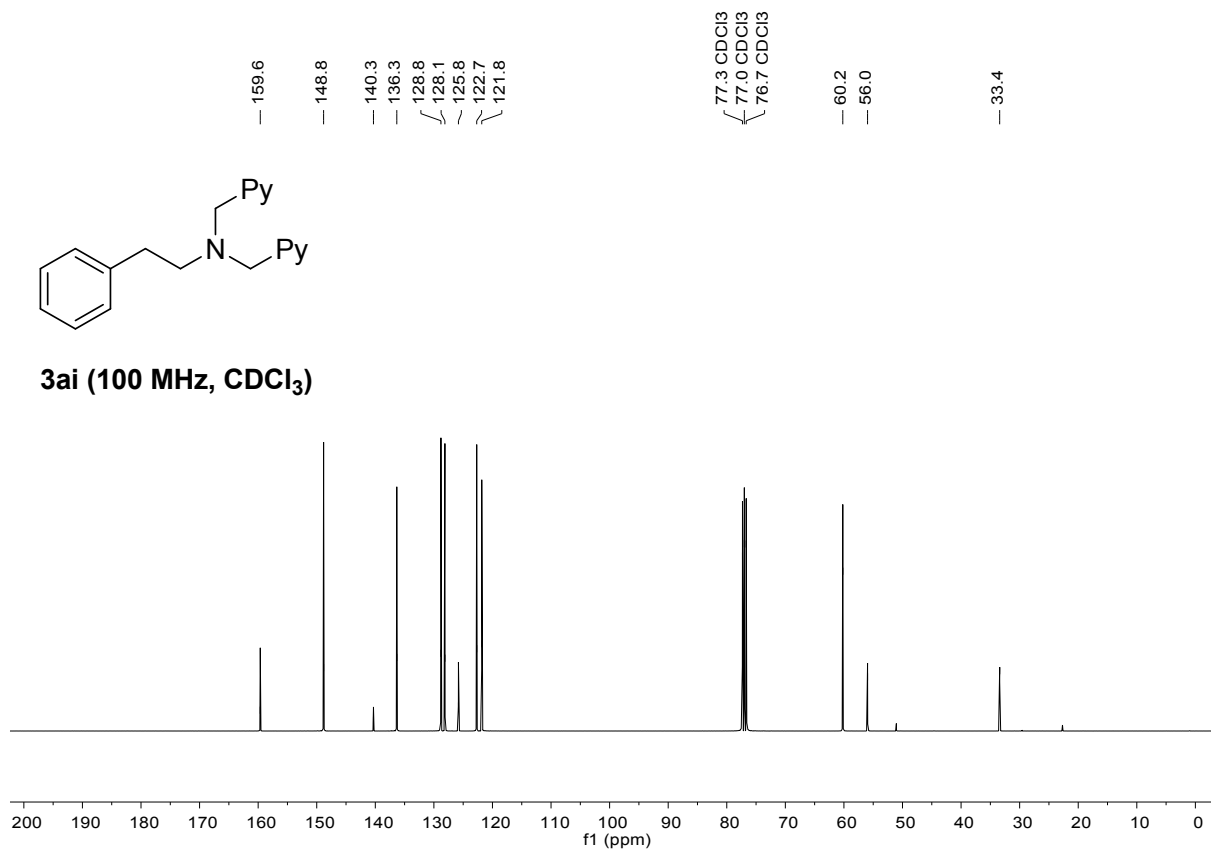

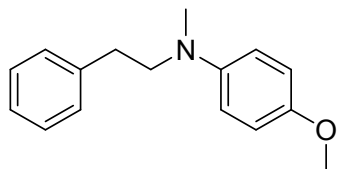

**3aj (400 MHz, CDCl<sub>3</sub>)**

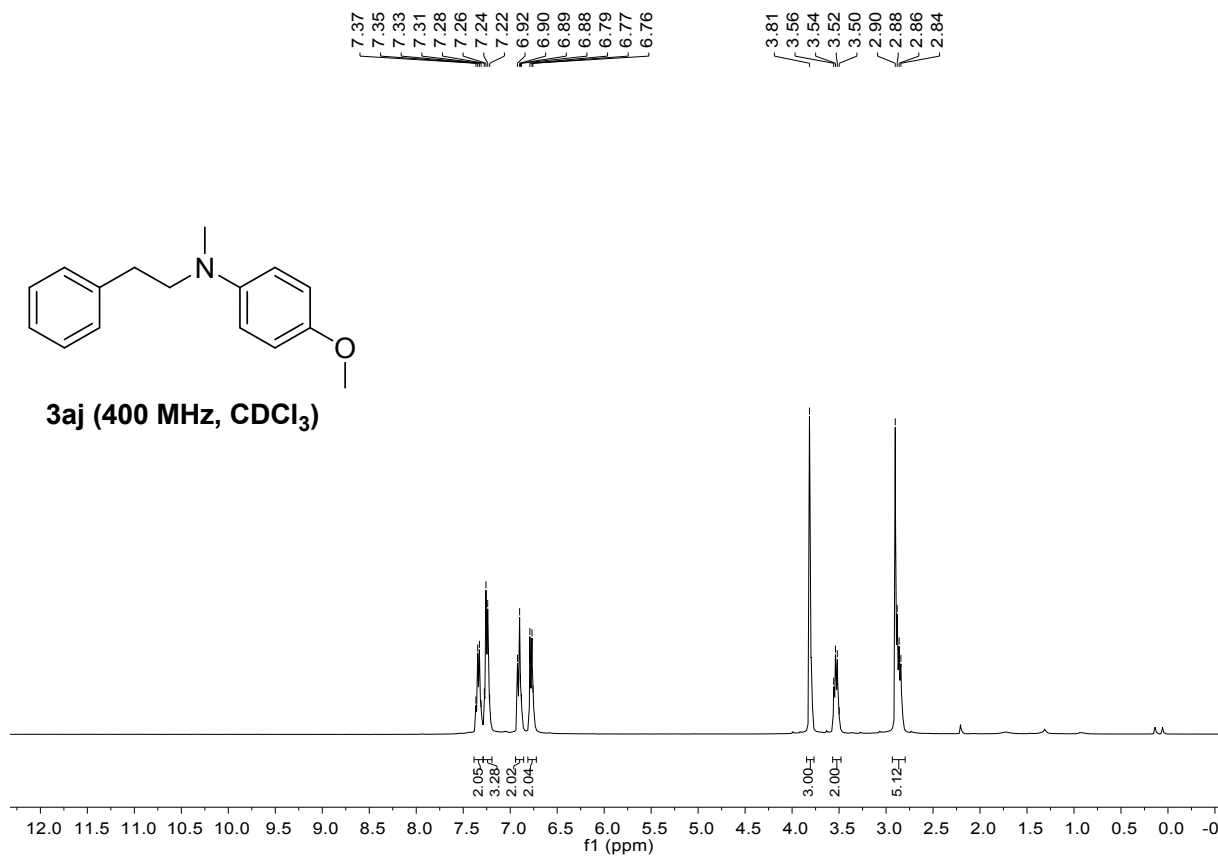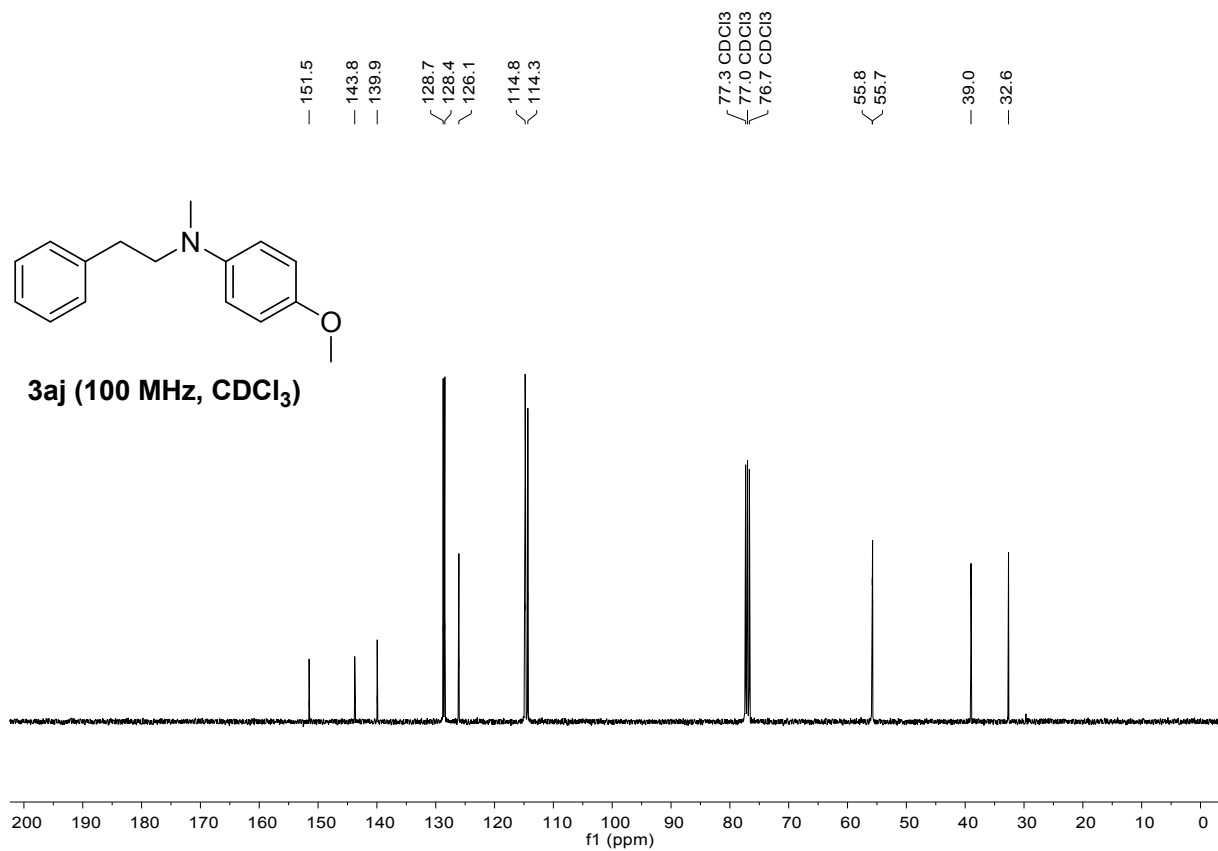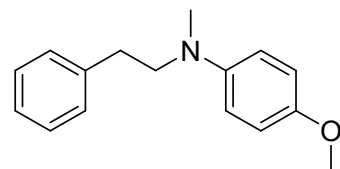

**3aj (100 MHz, CDCl<sub>3</sub>)**

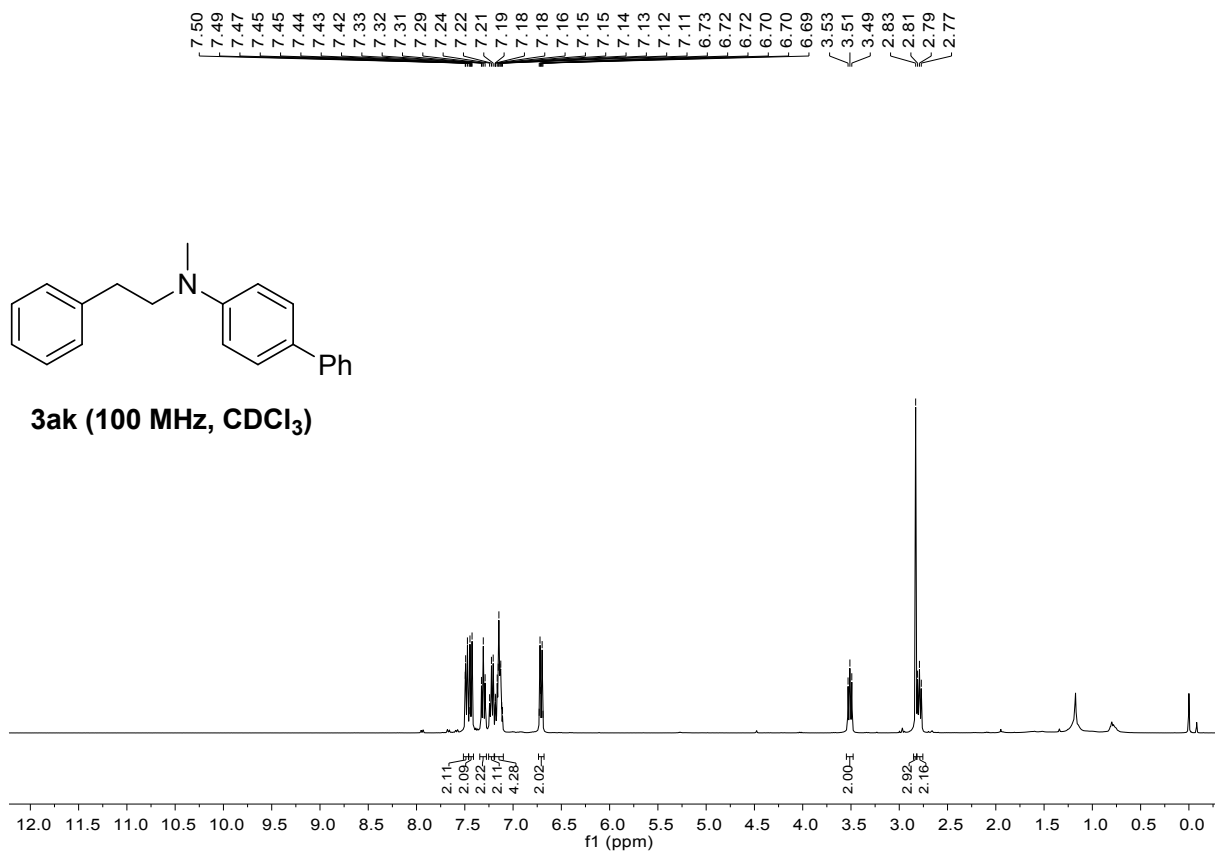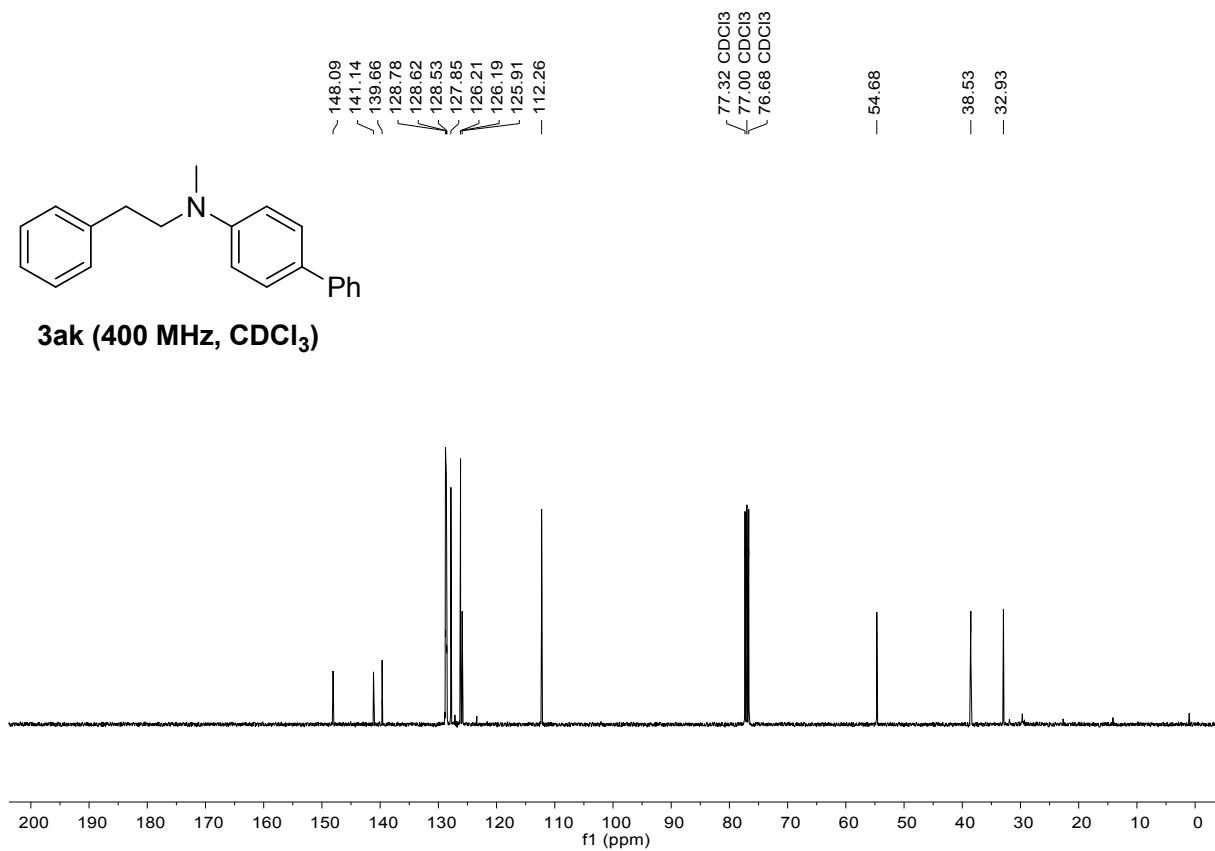

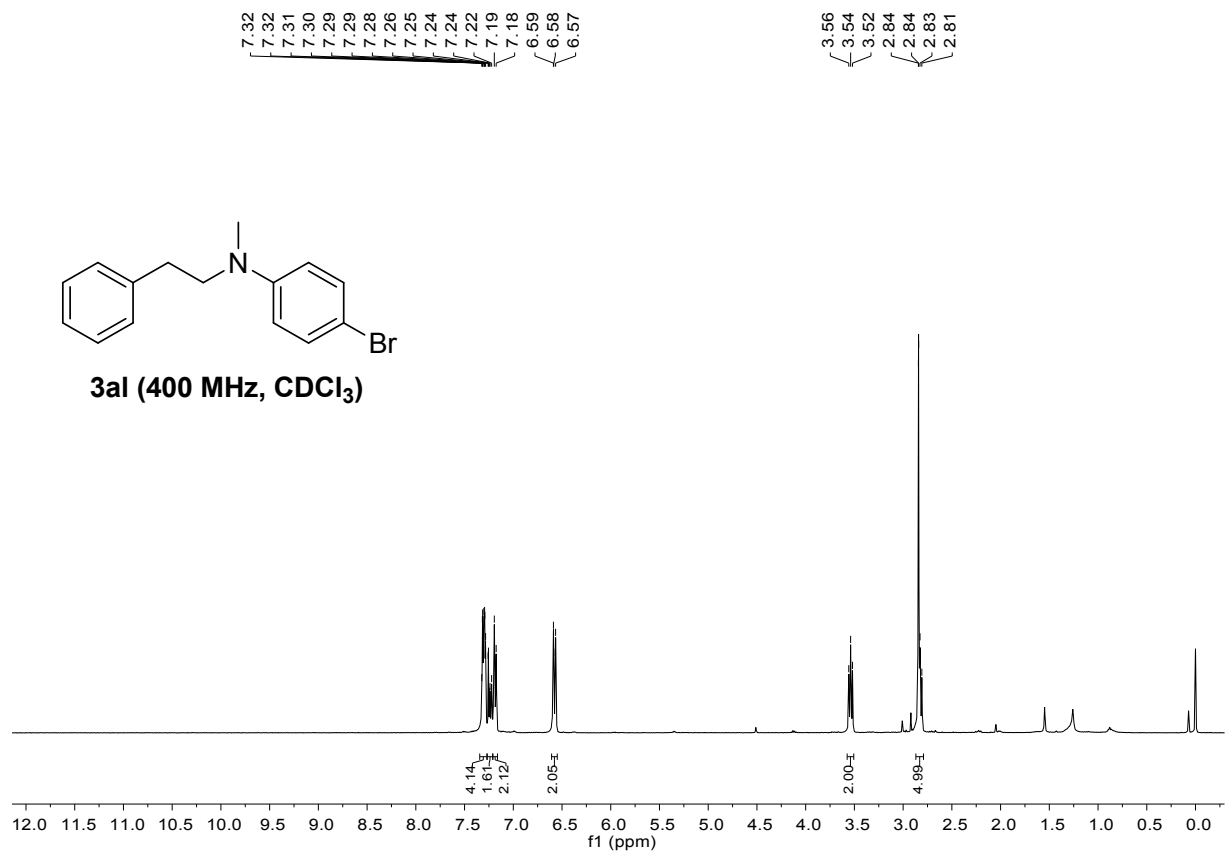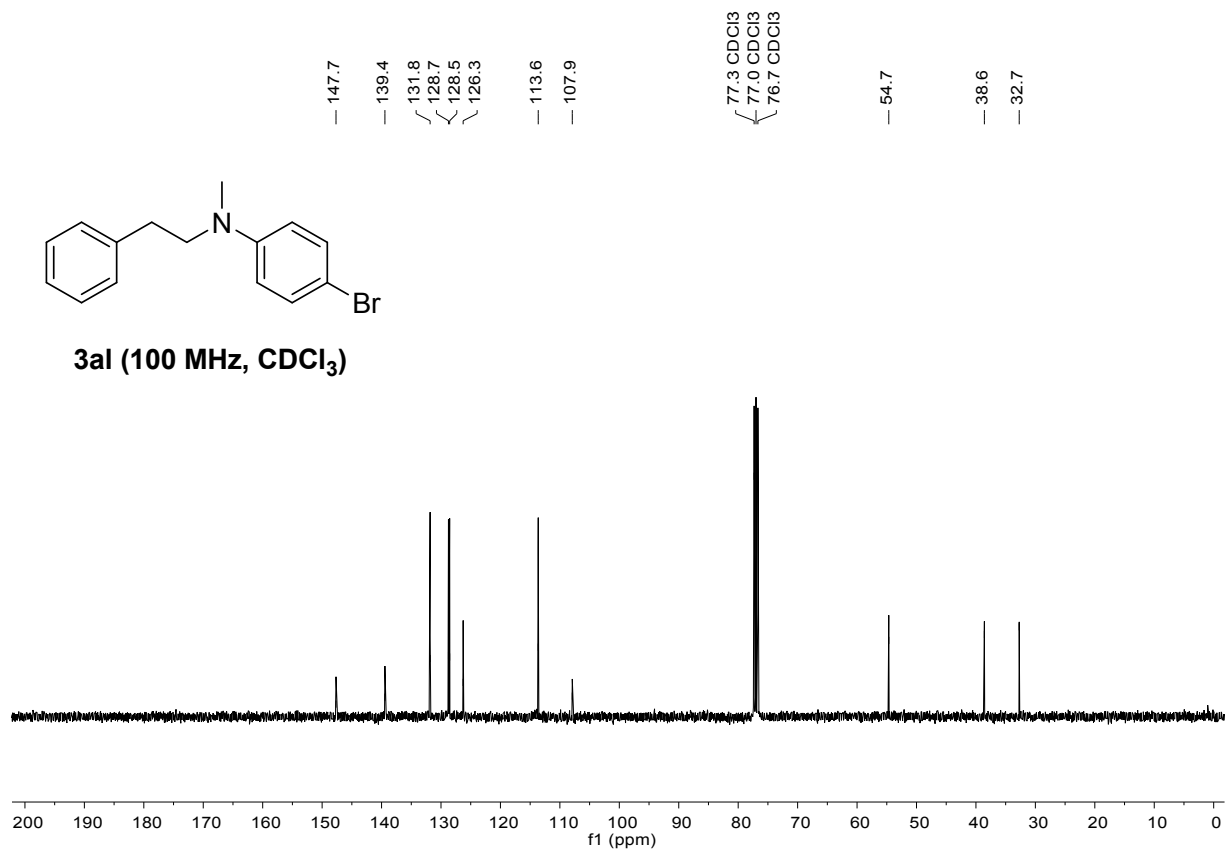

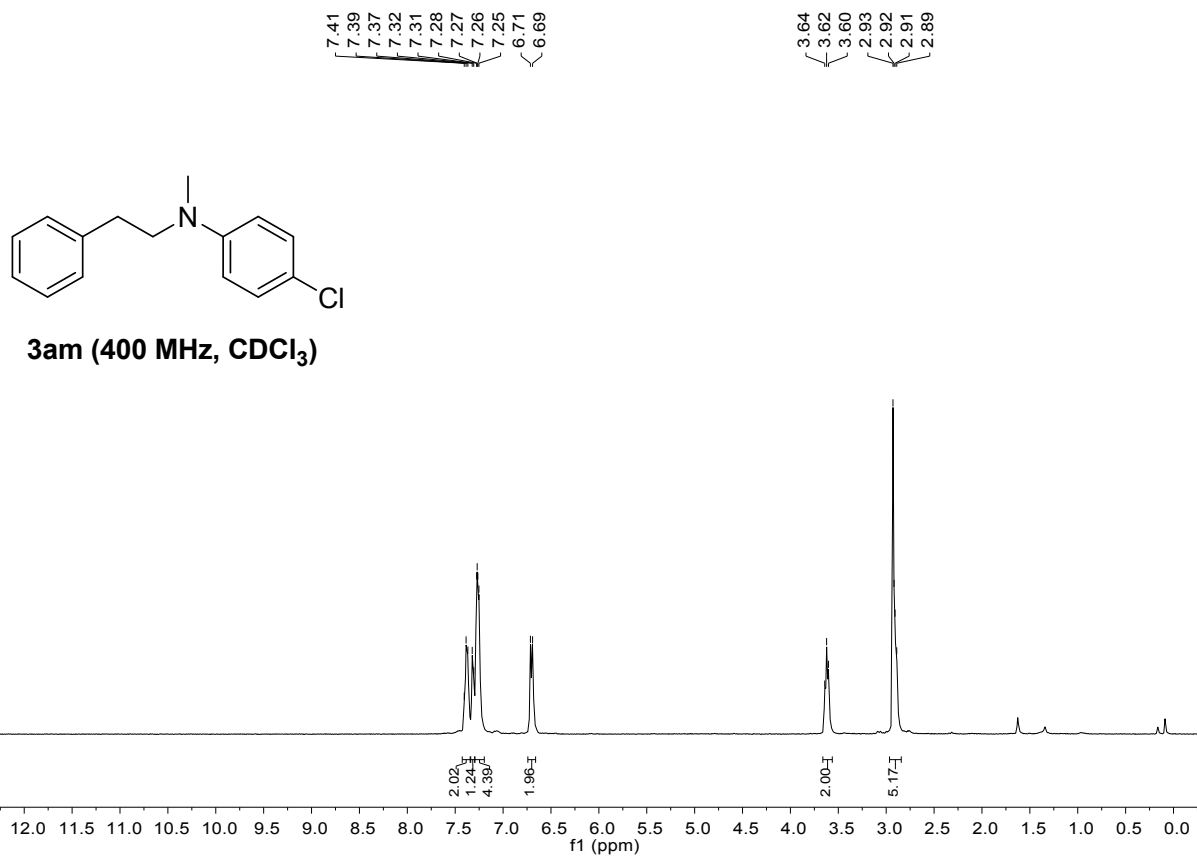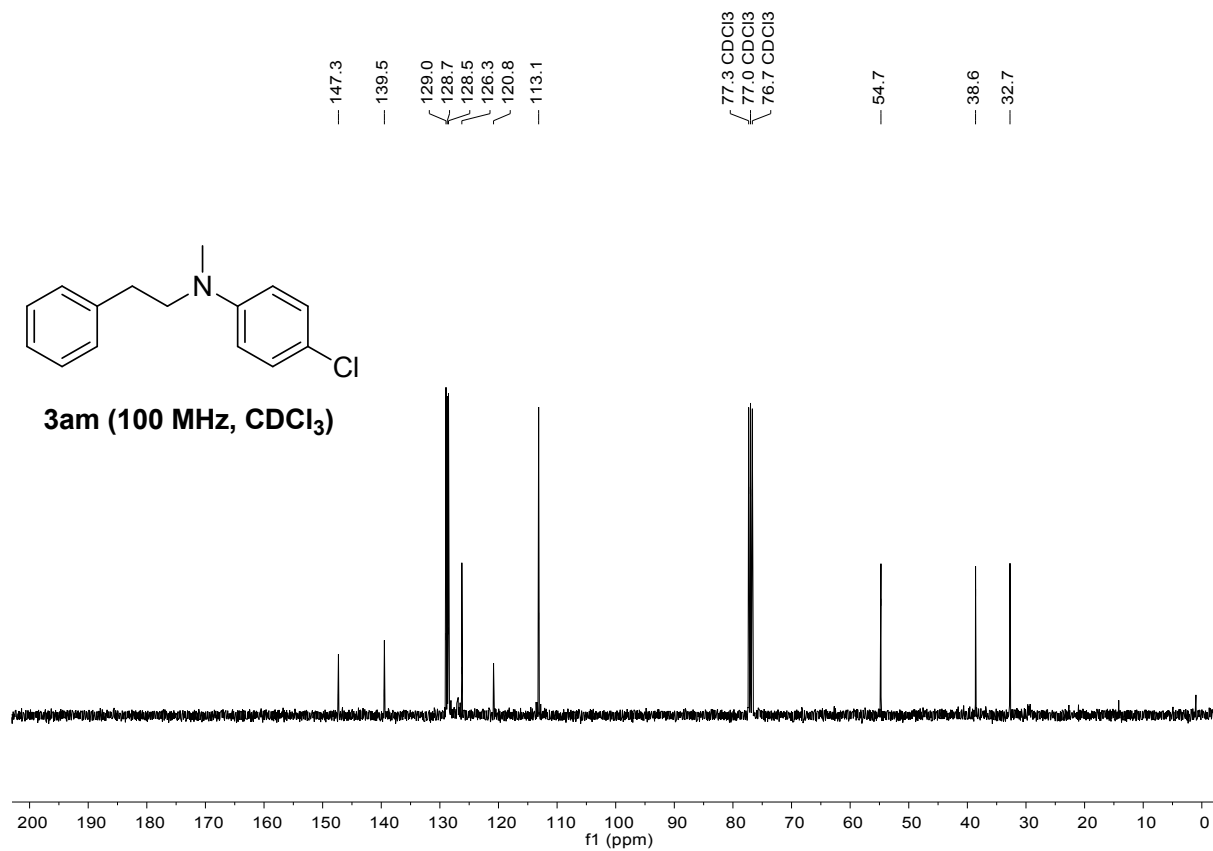

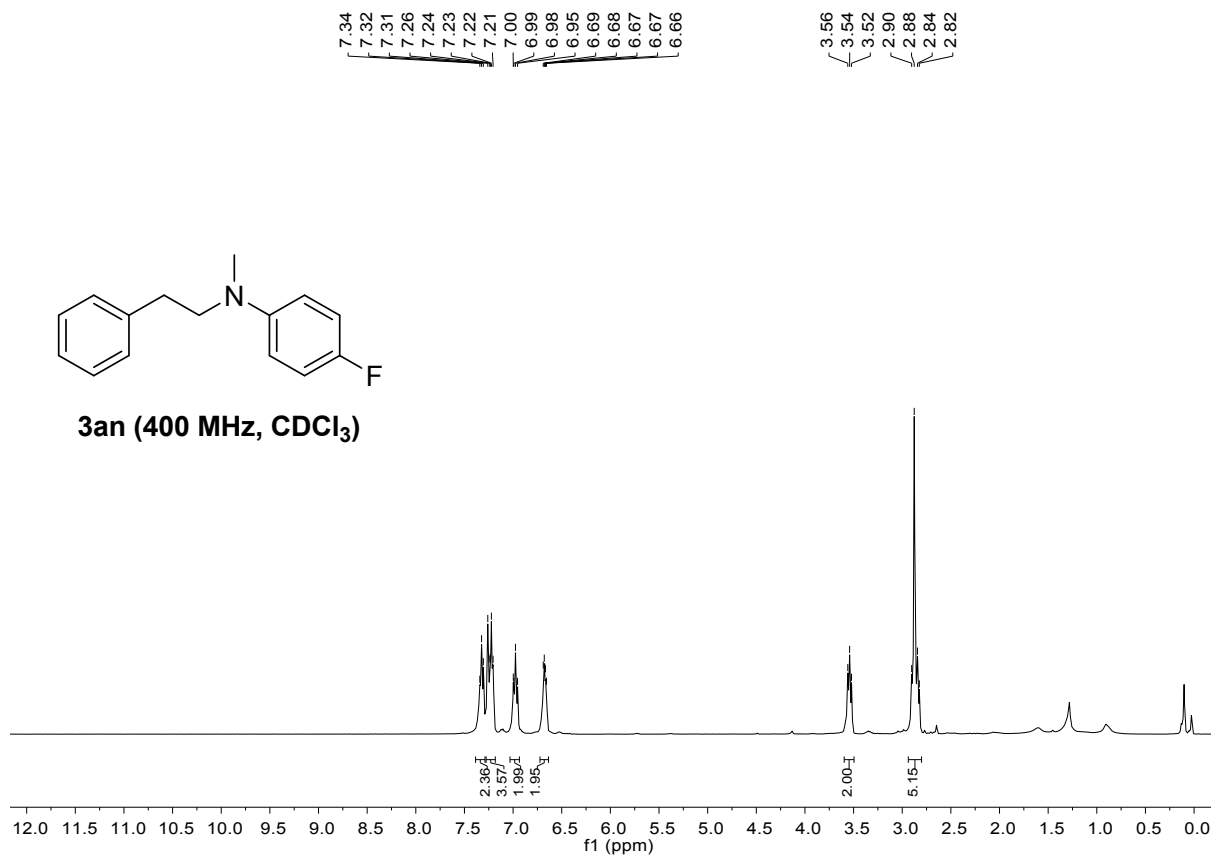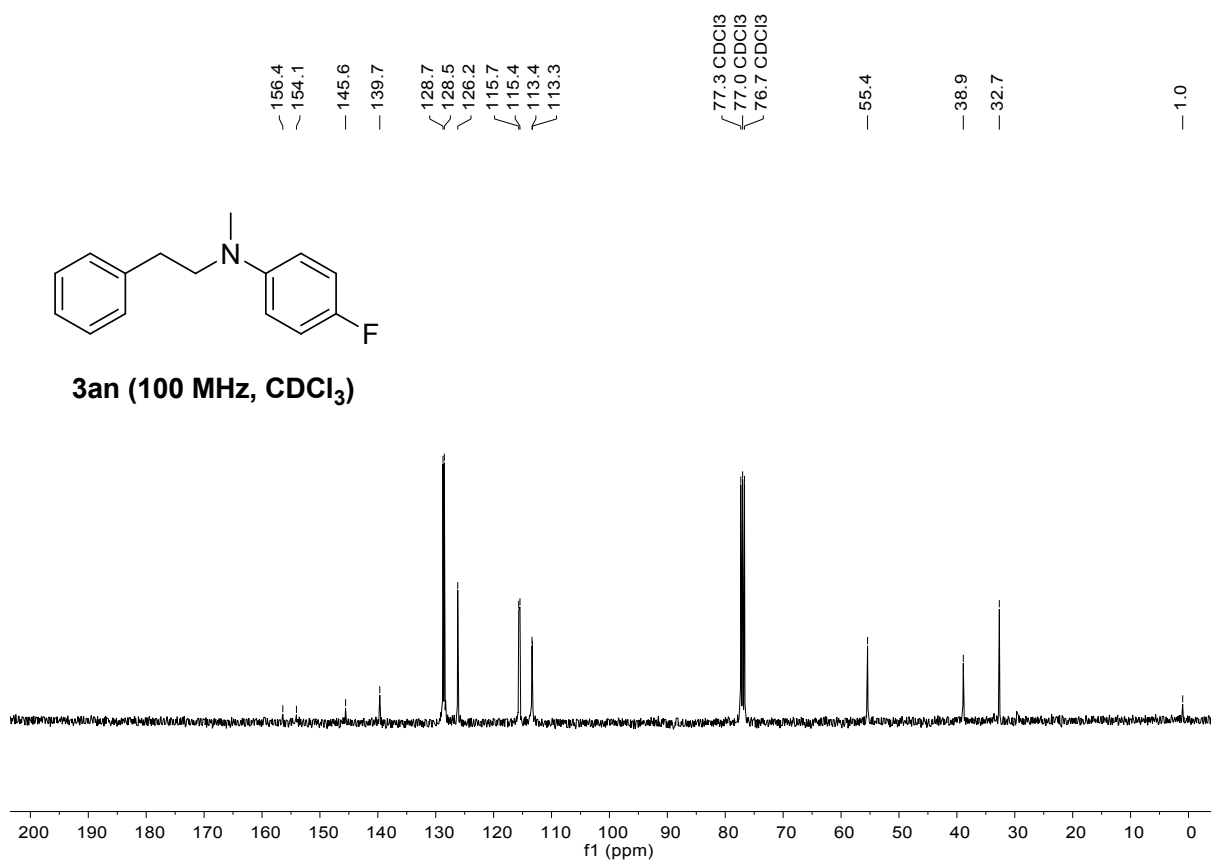



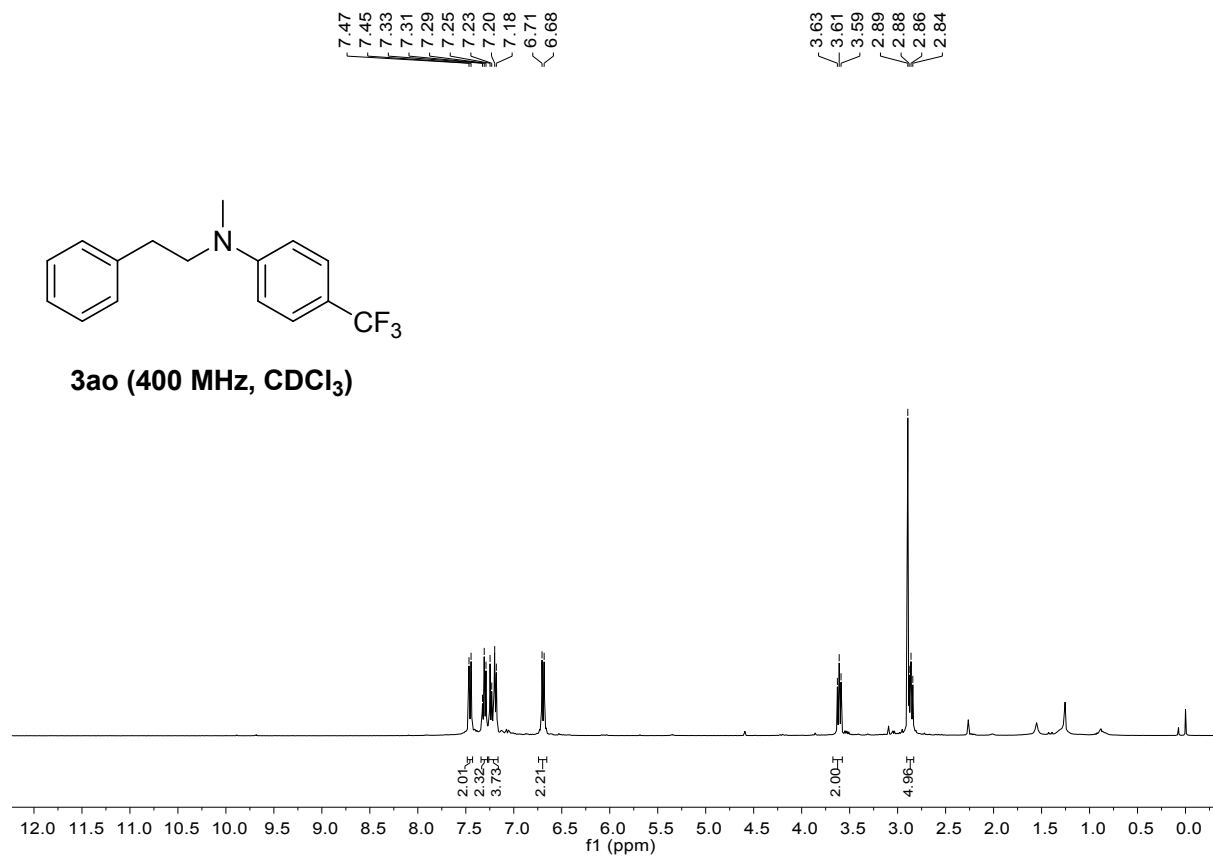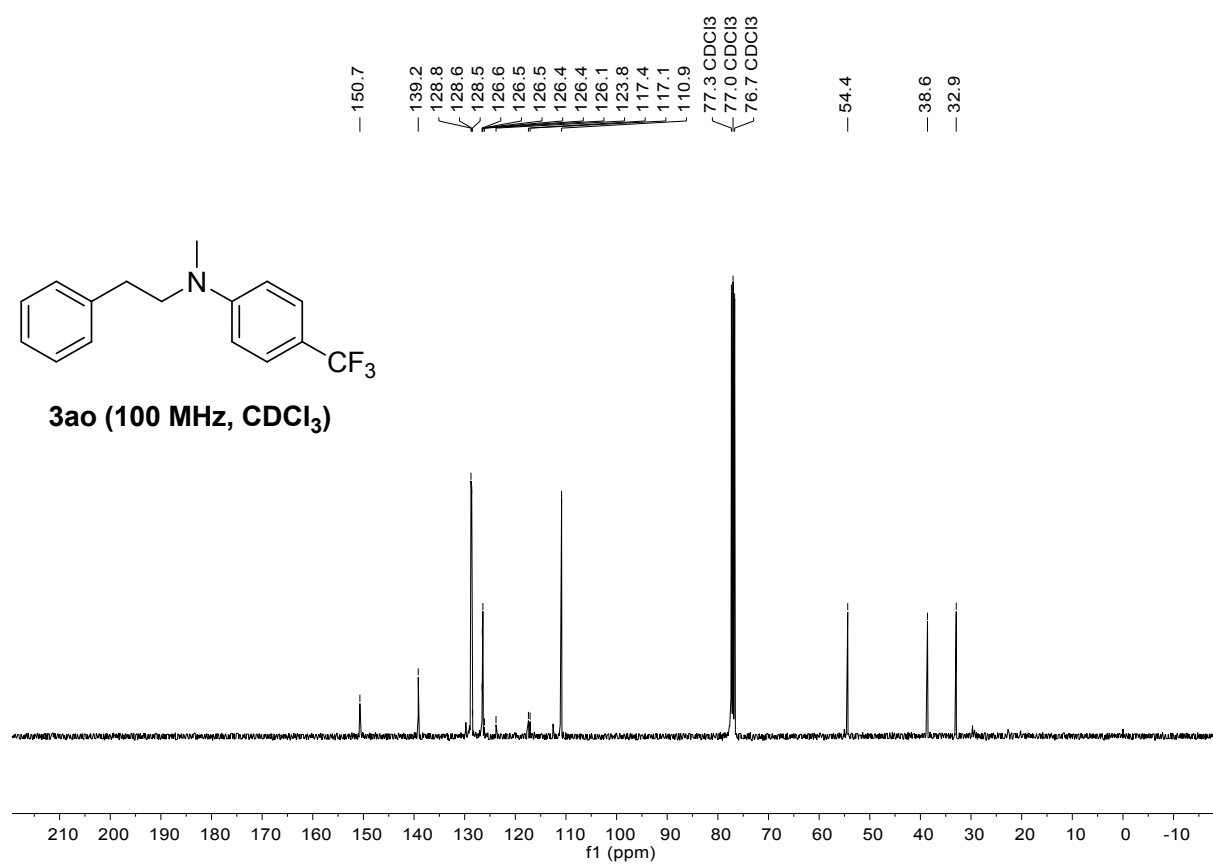

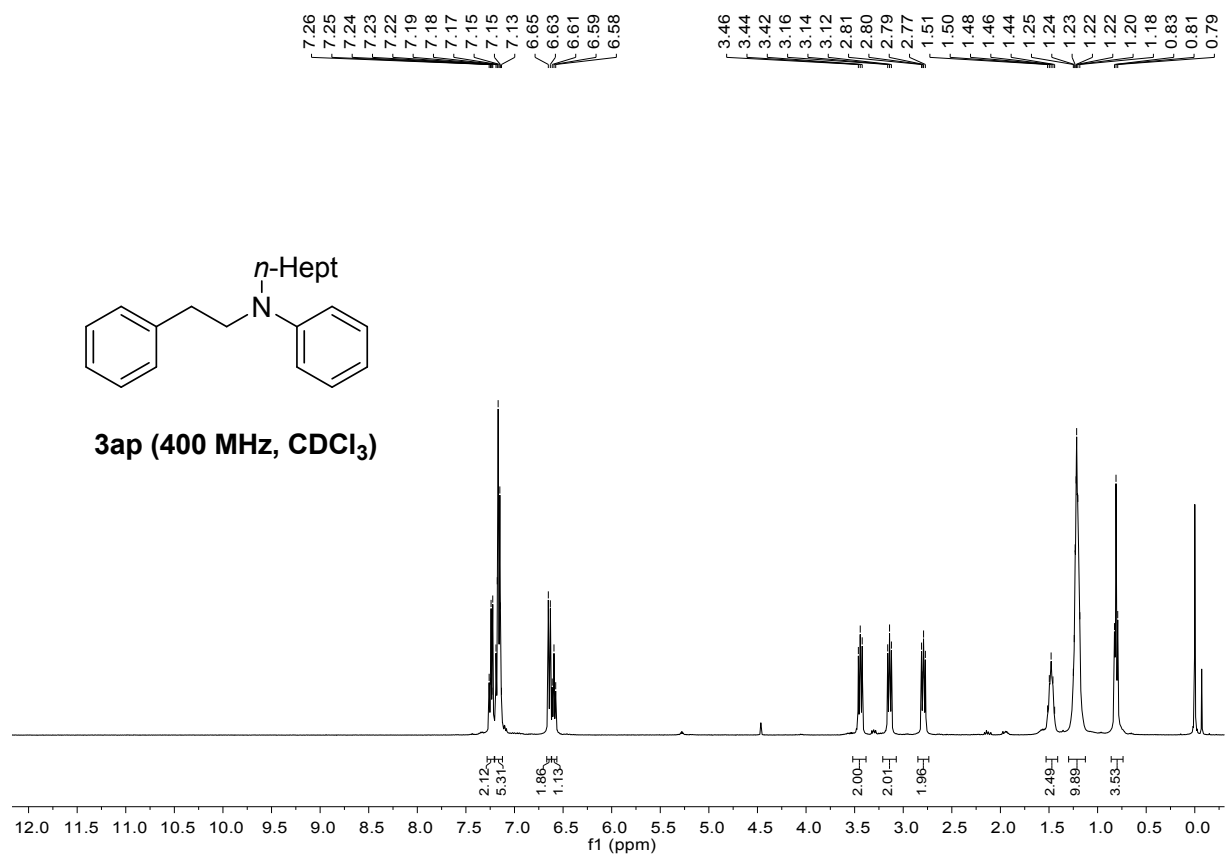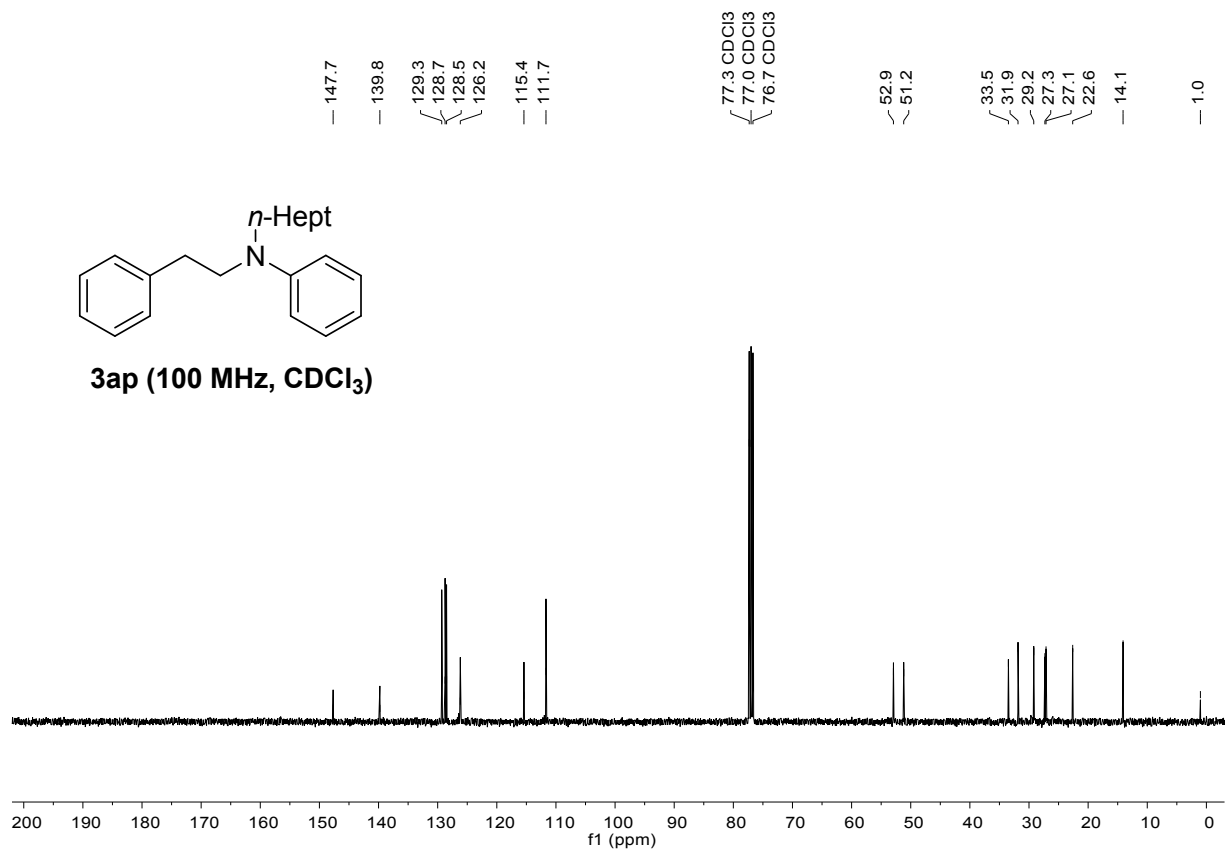

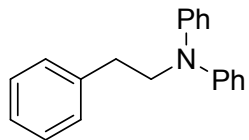

**3aq (400 MHz, CDCl<sub>3</sub>)**

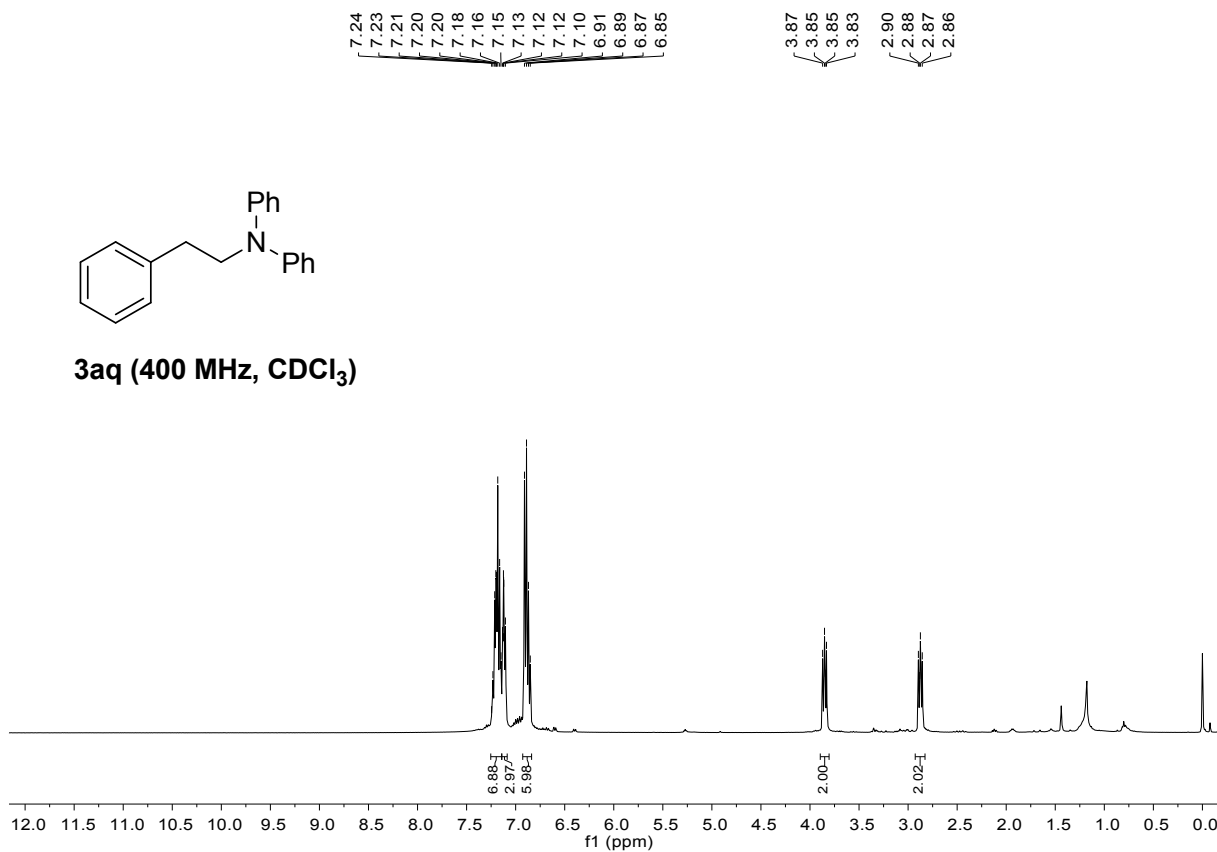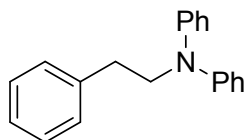

**3aq (100 MHz, CDCl<sub>3</sub>)**

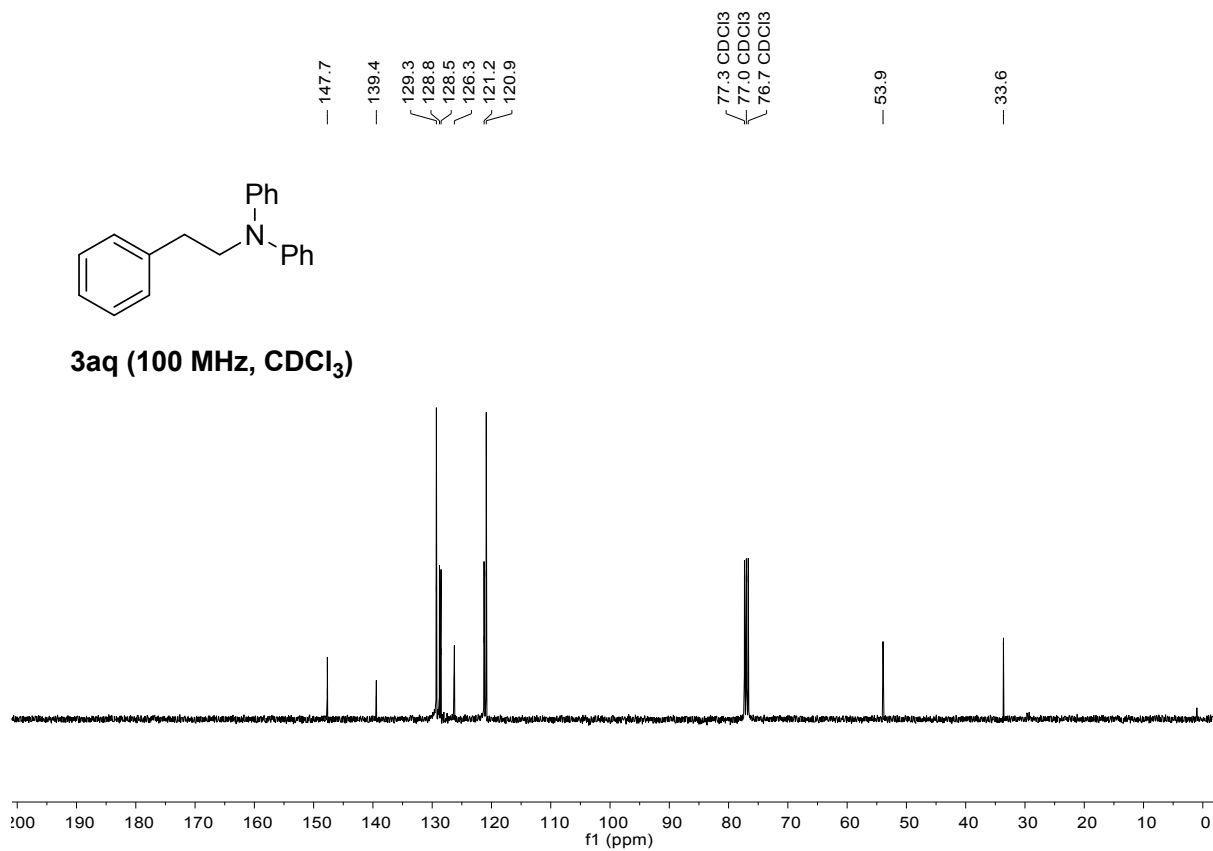

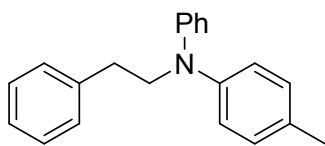

**3ar (400 MHz, CDCl<sub>3</sub>)**

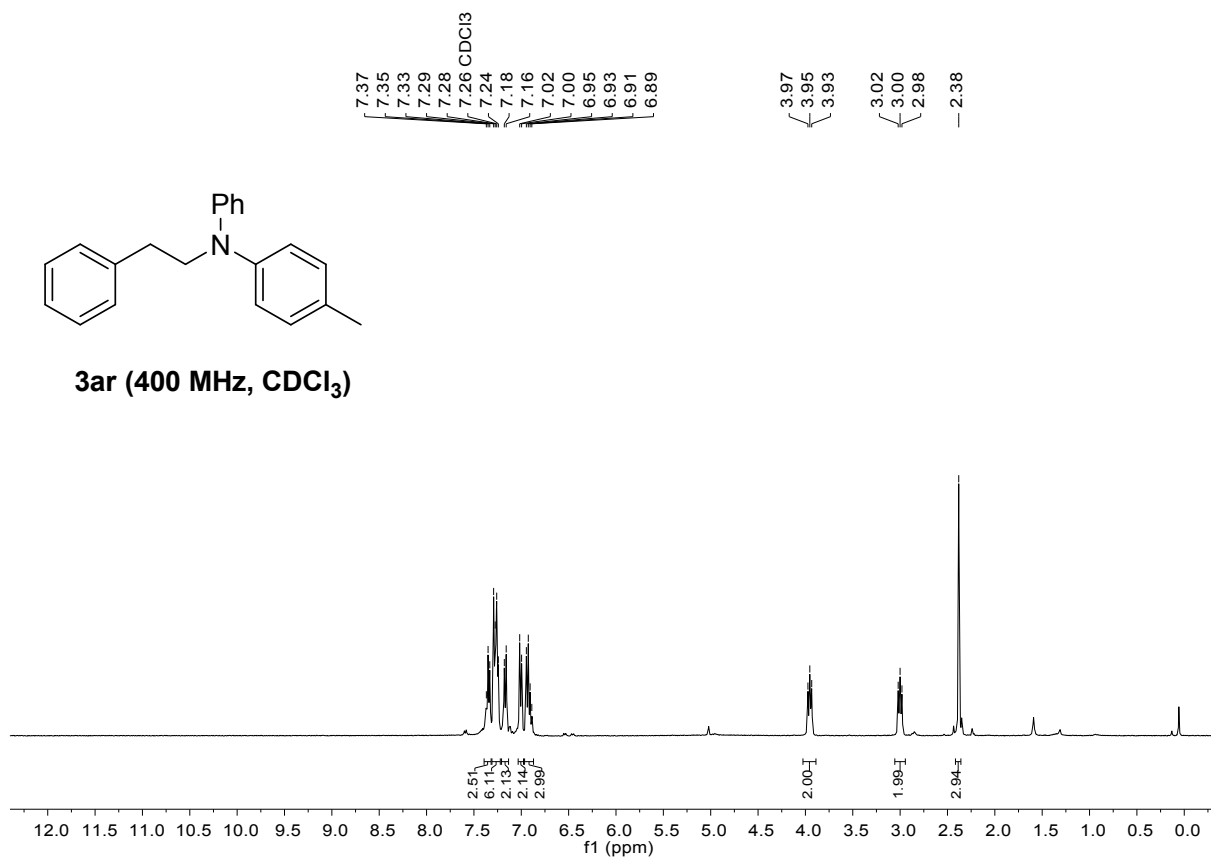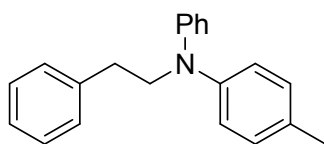

**3ar (100 MHz, CDCl<sub>3</sub>)**

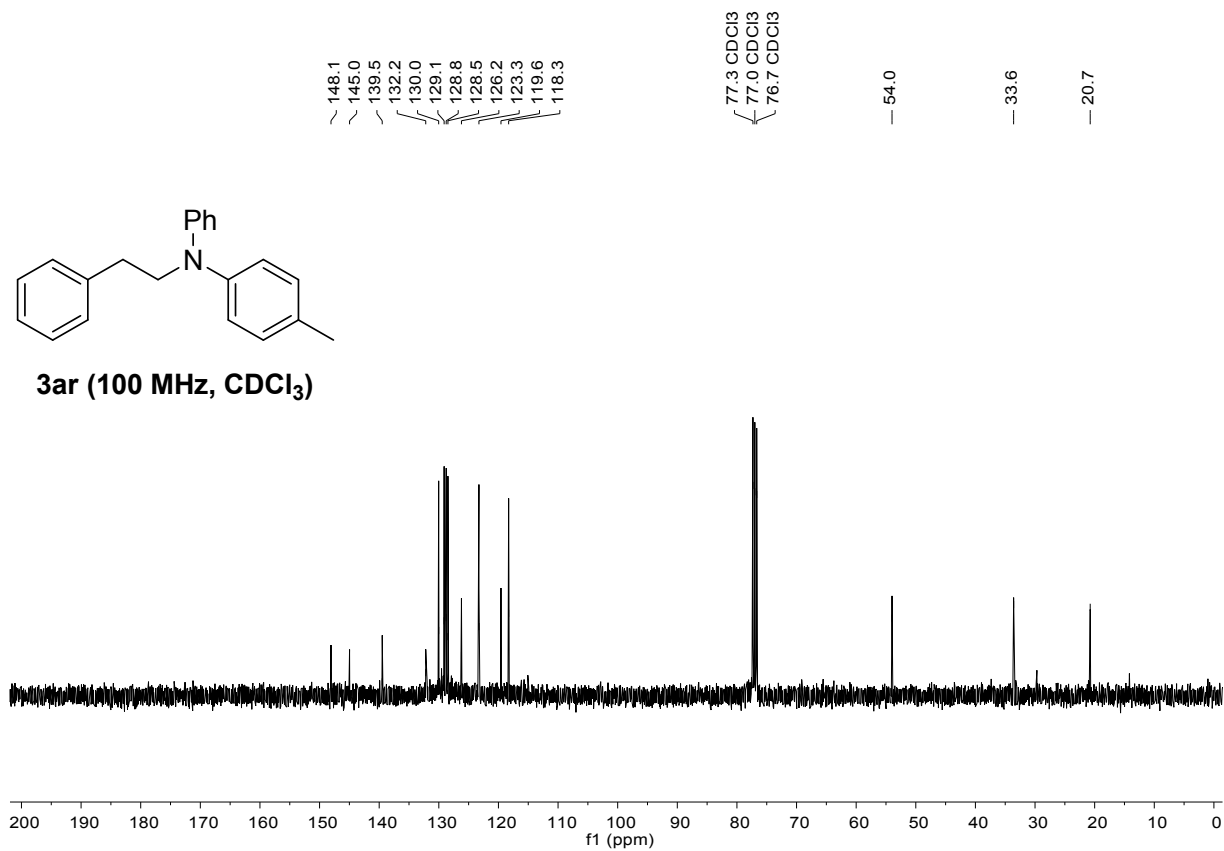

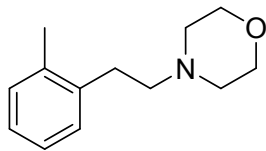

**3bc (400 MHz, CDCl<sub>3</sub>)**

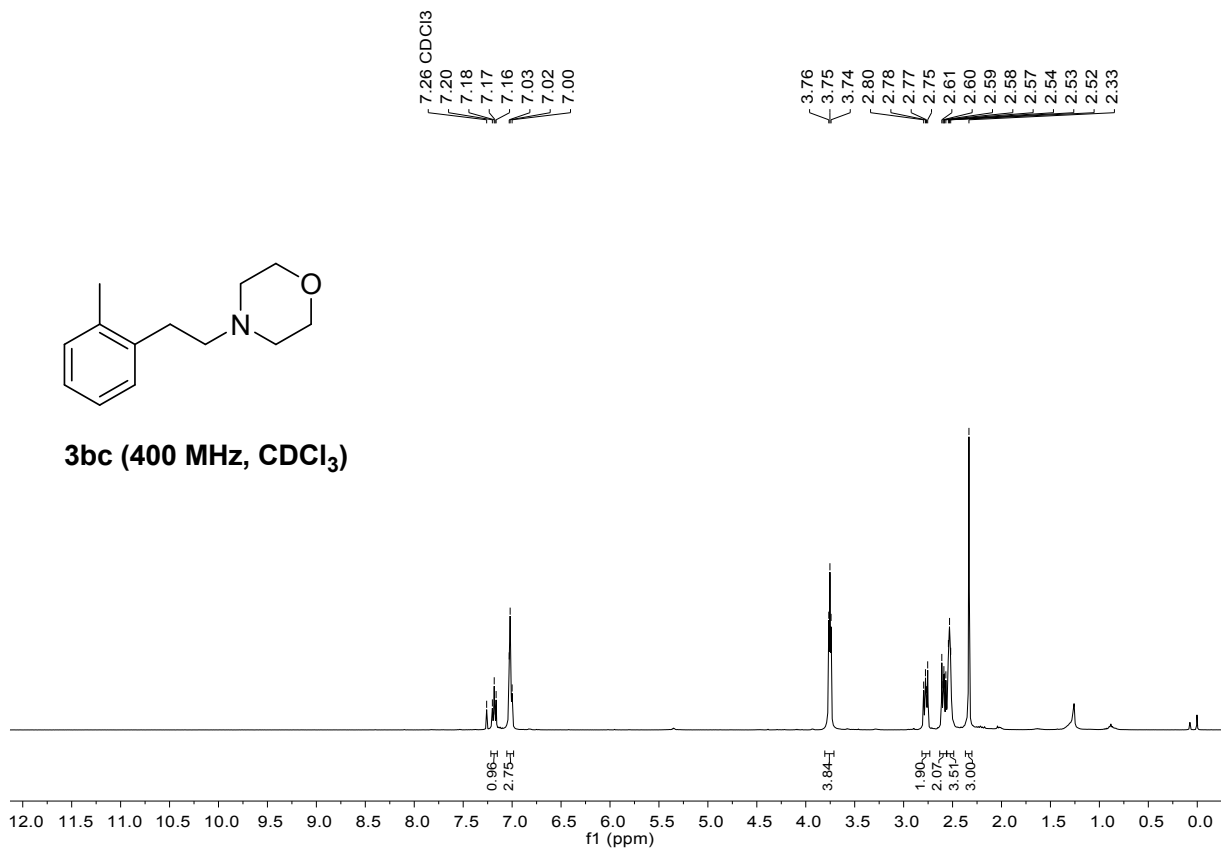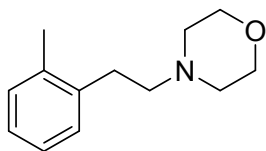

**3bc (100 MHz, CDCl<sub>3</sub>)**

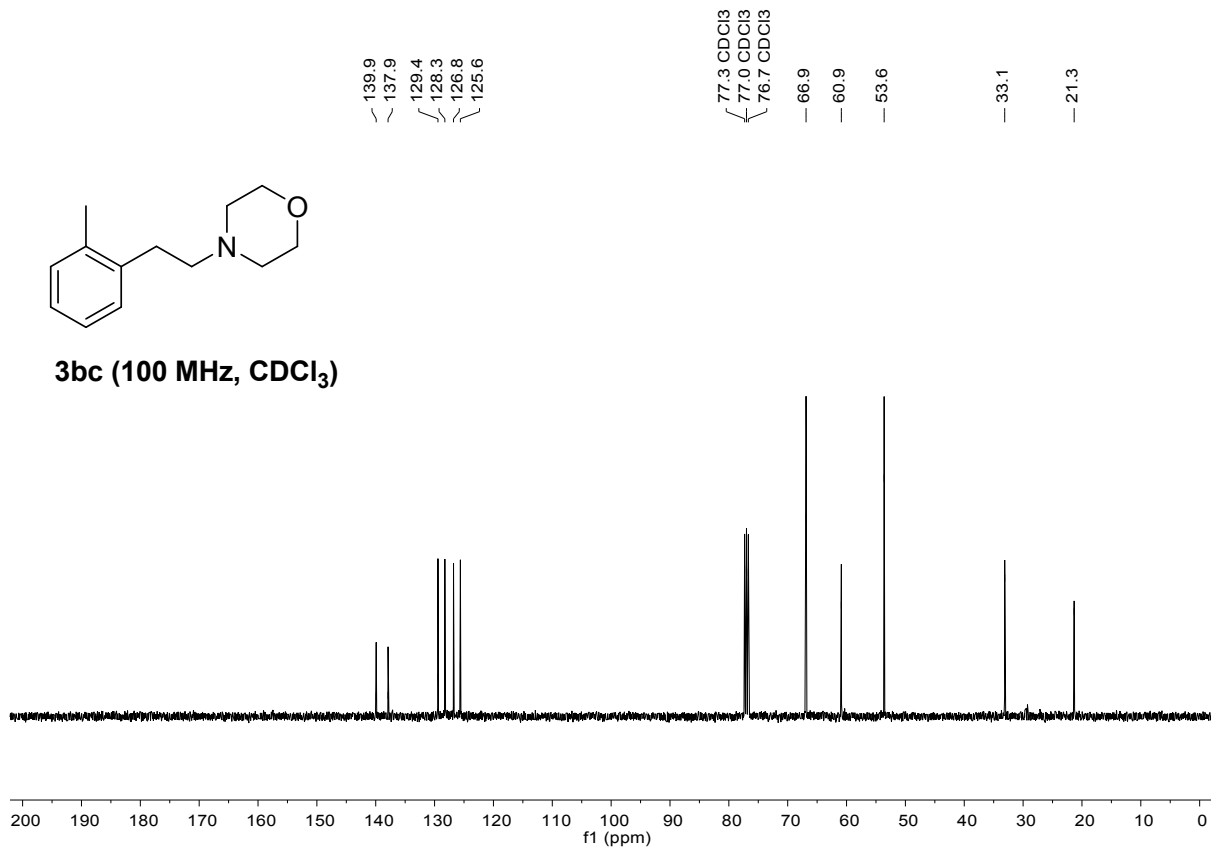

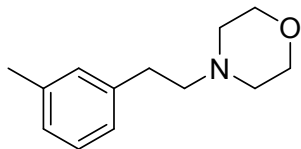

**3cc (400 MHz, CDCl<sub>3</sub>)**

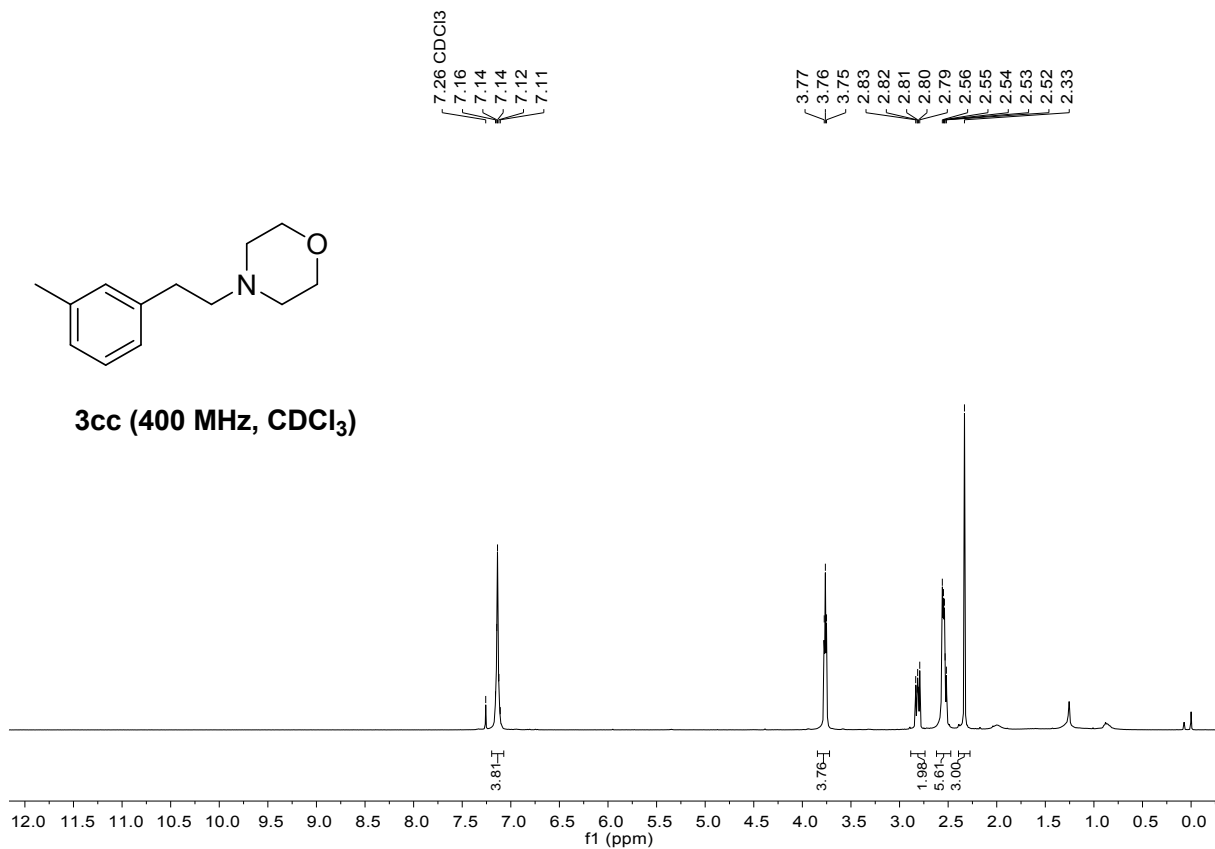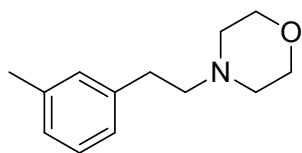

**3cc (100 MHz, CDCl<sub>3</sub>)**

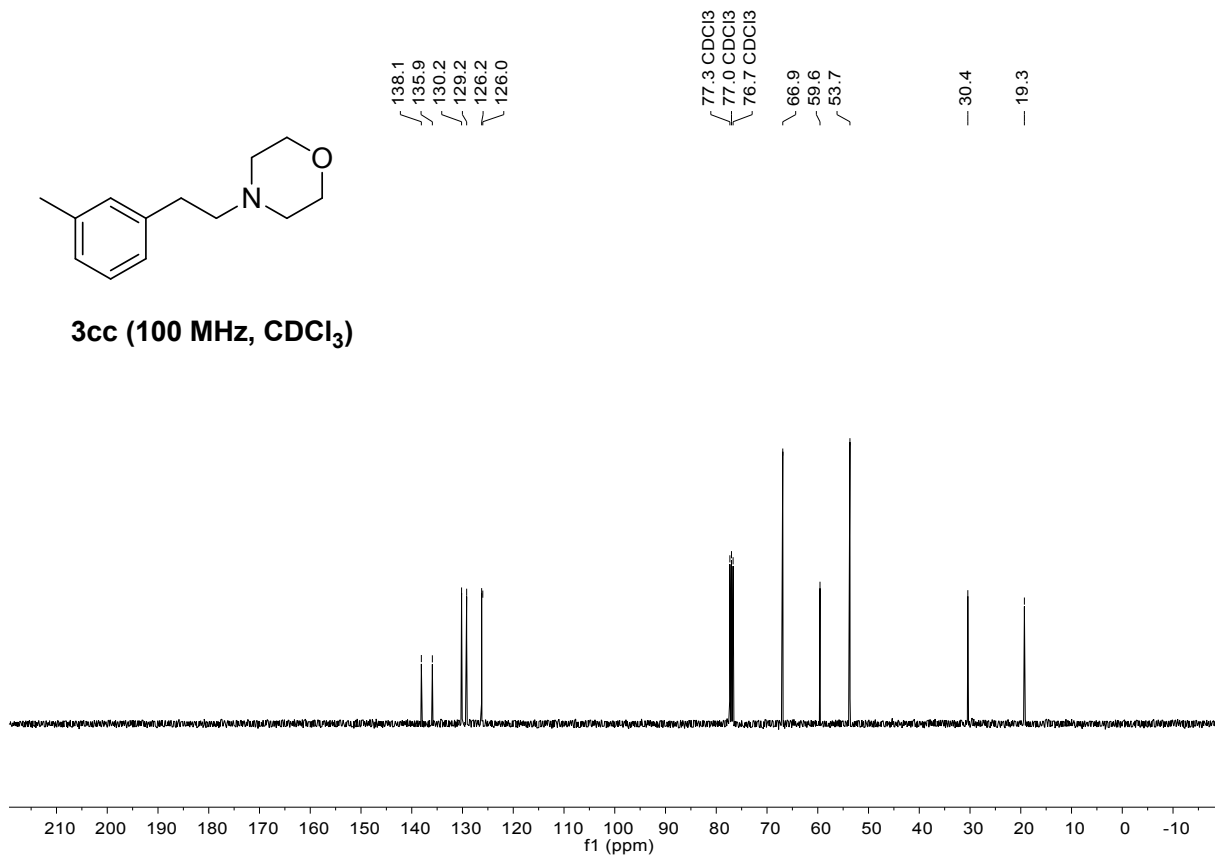

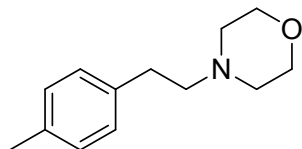

**3dc (400 MHz, CDCl<sub>3</sub>)**

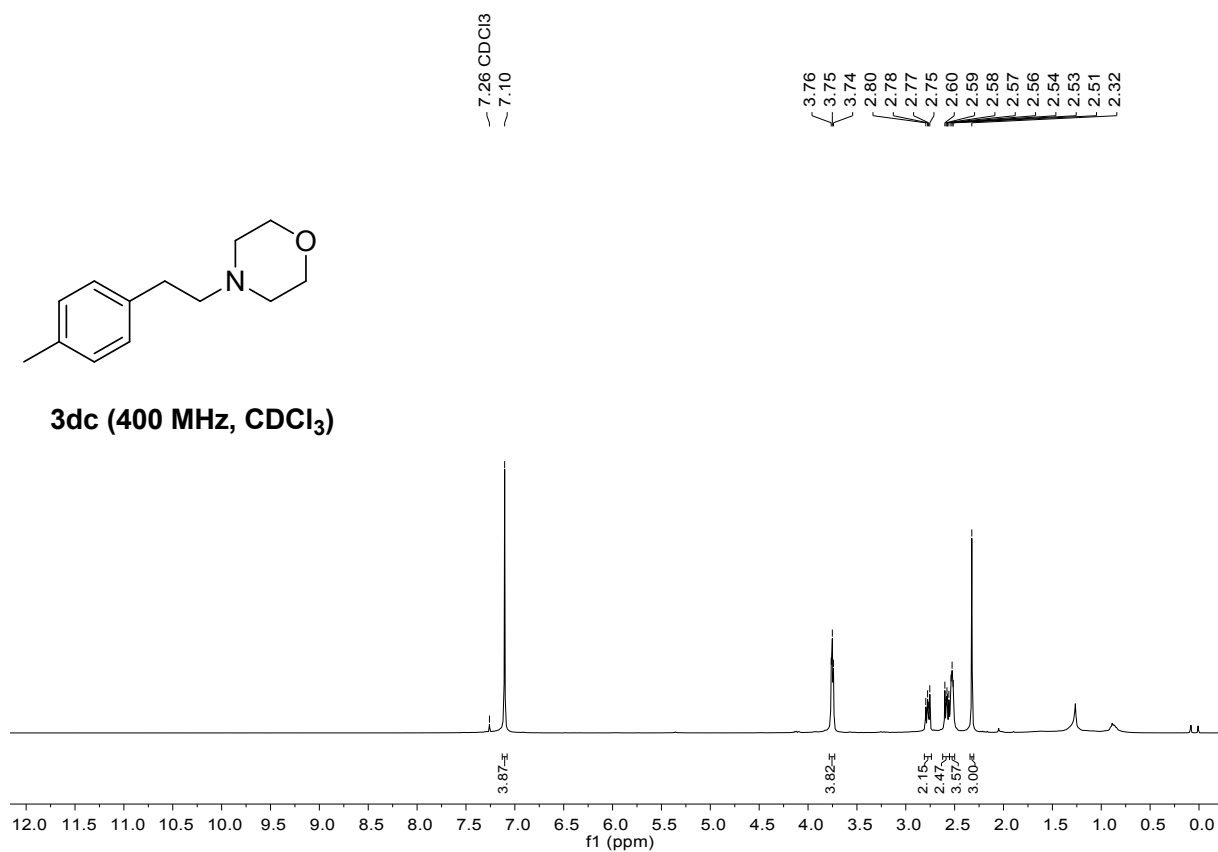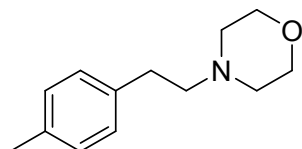

**3dc (100 MHz, CDCl<sub>3</sub>)**

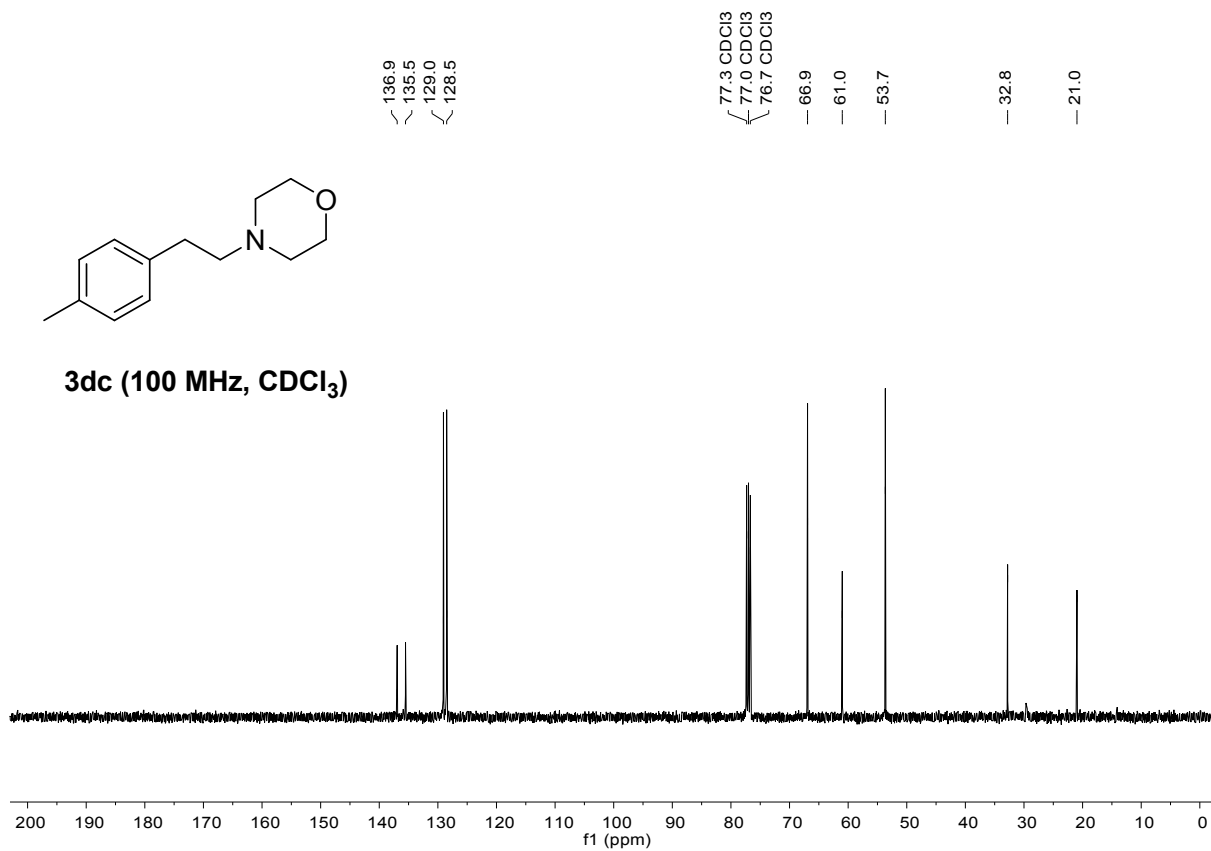

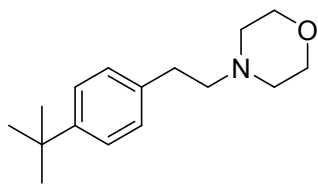

**3ec (400 MHz, CDCl<sub>3</sub>)**

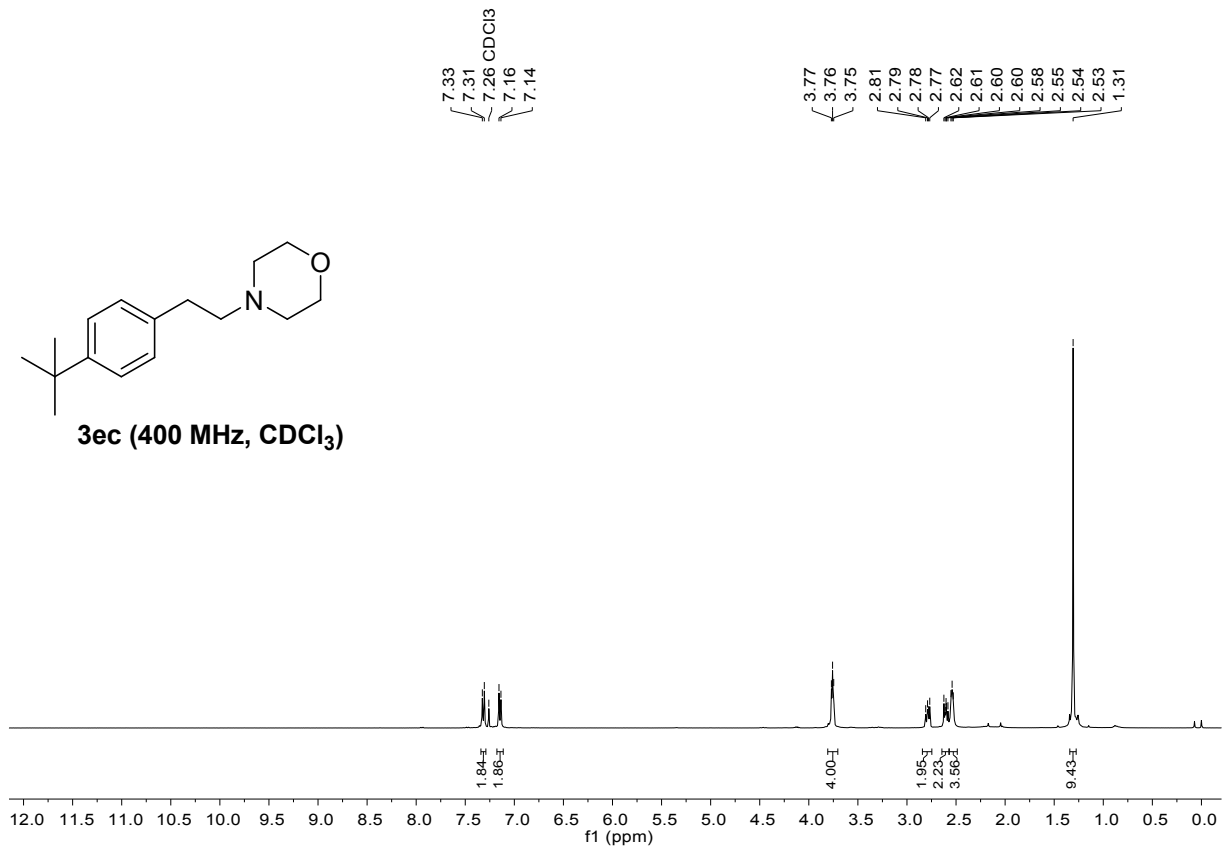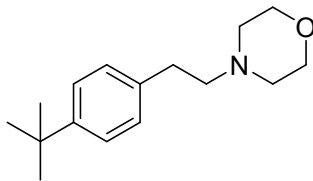

**3ec (100 MHz, CDCl<sub>3</sub>)**

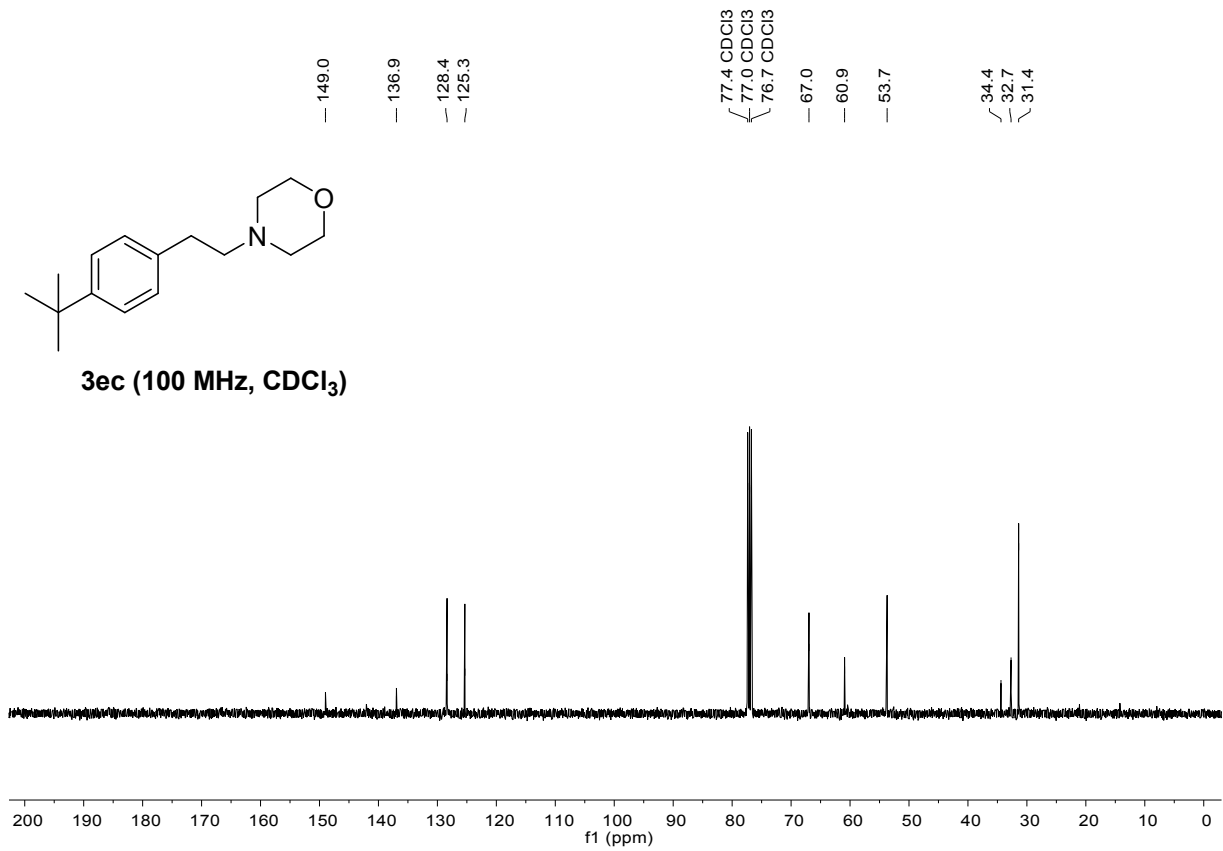



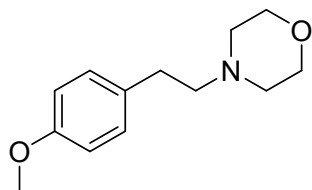

**3fc (400 MHz, CDCl<sub>3</sub>)**

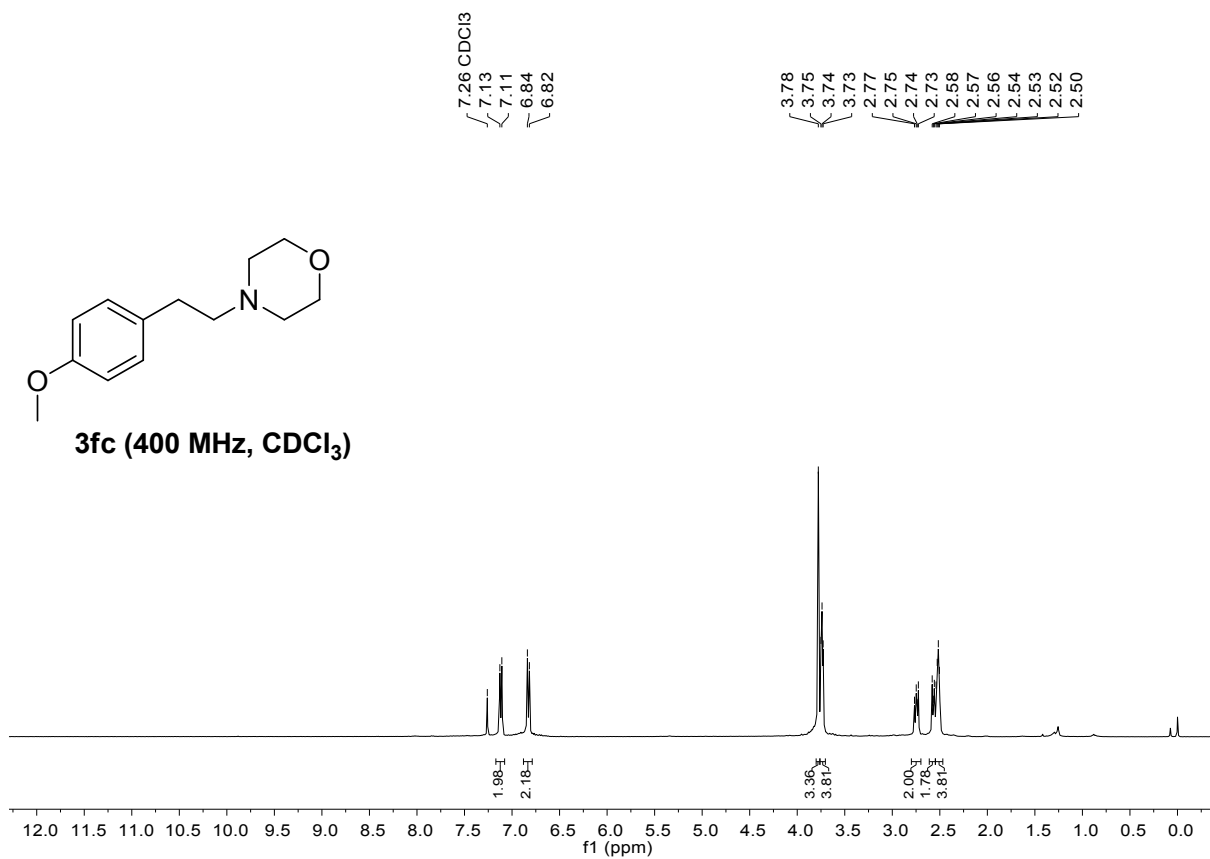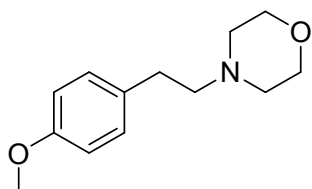

**3fc (100 MHz, CDCl<sub>3</sub>)**

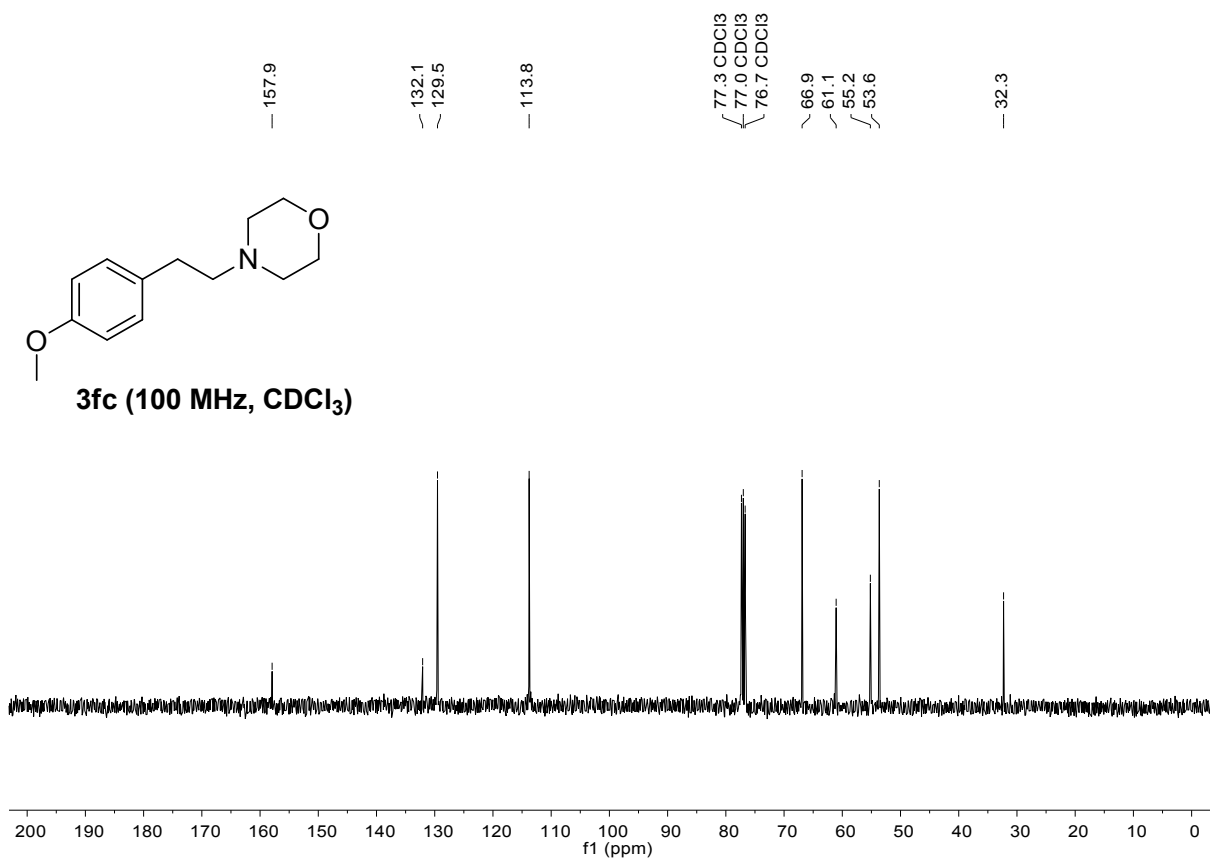

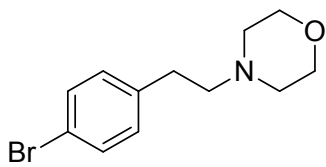

**3gc (400 MHz, CDCl<sub>3</sub>)**

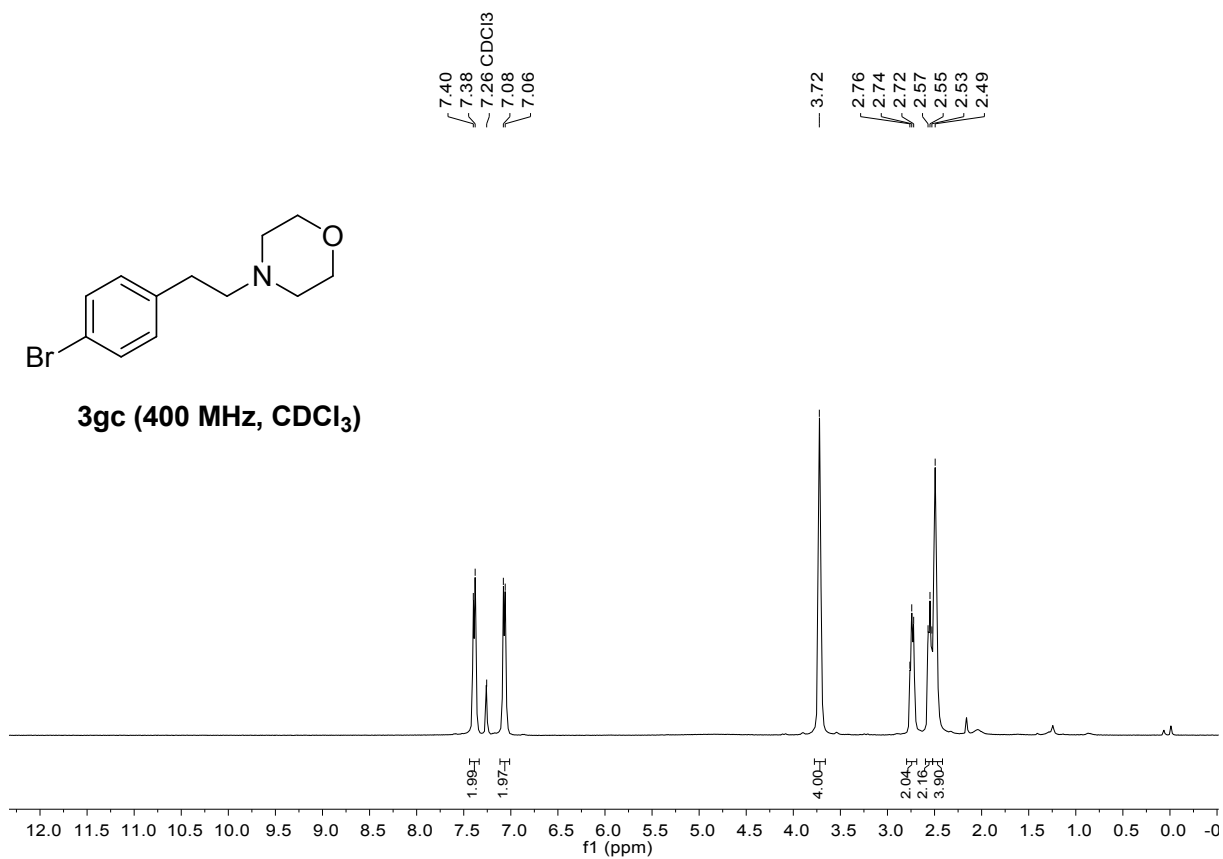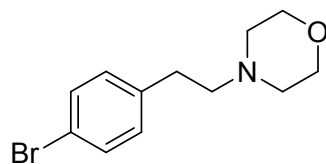

**3gc (100 MHz, CDCl<sub>3</sub>)**

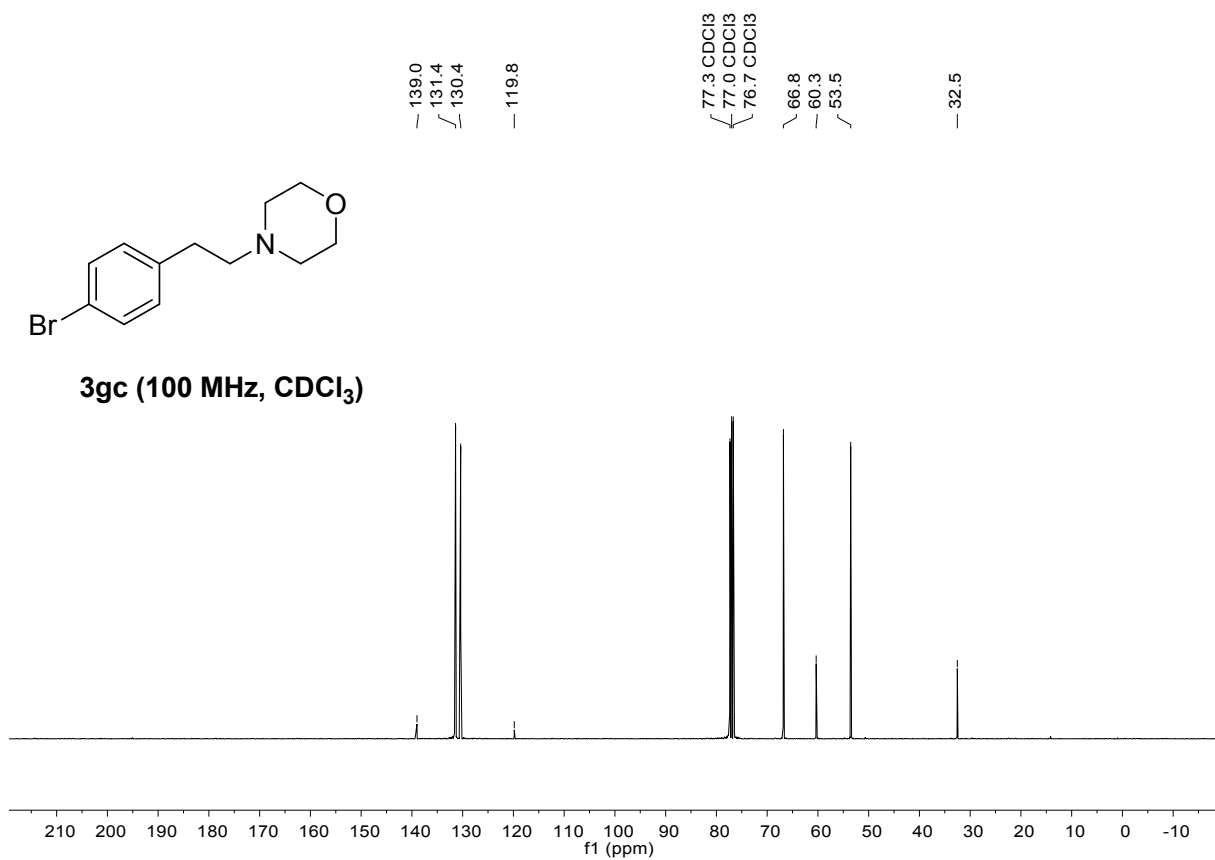

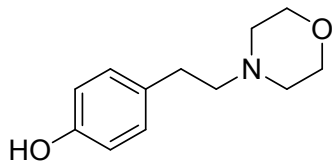

**3hc (400 MHz, CDCl<sub>3</sub>)**

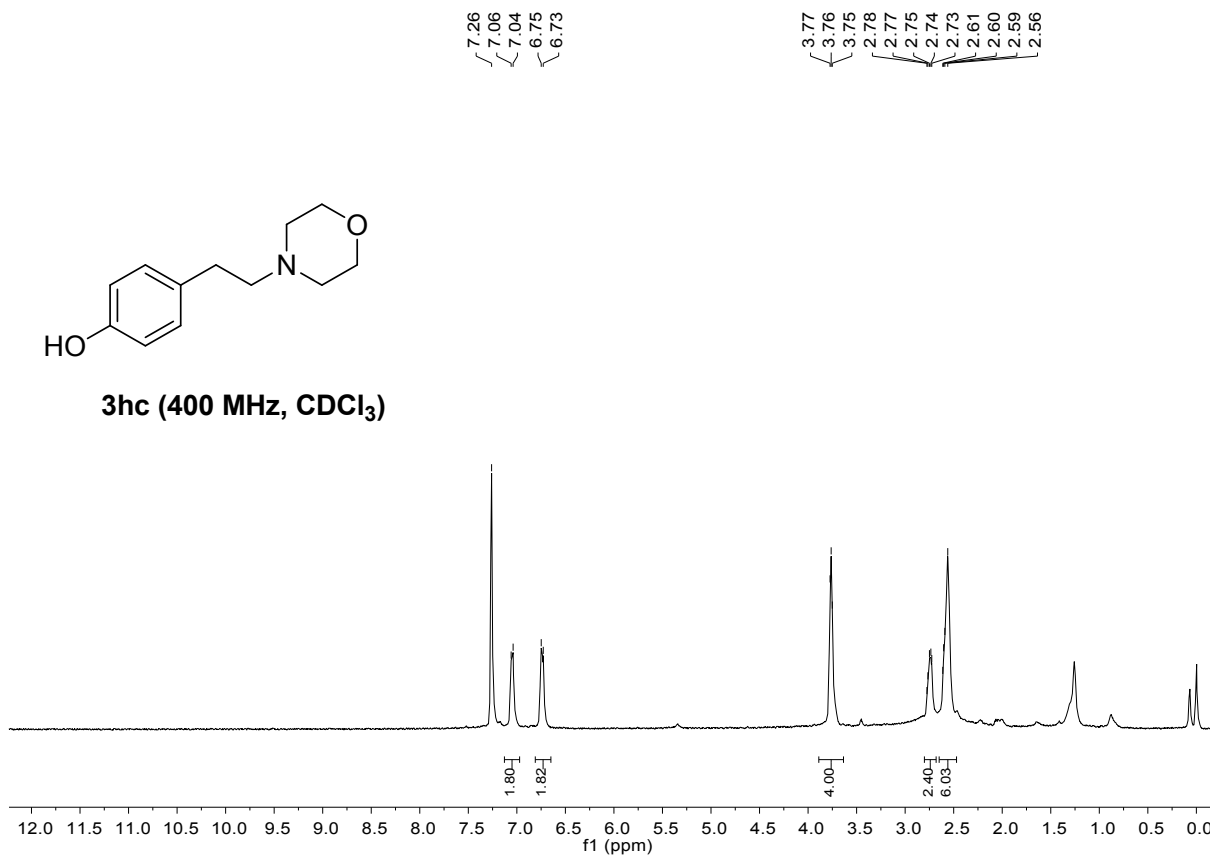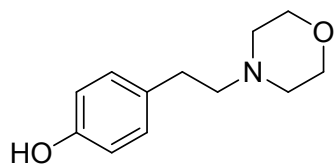

**3hc (100 MHz, CDCl<sub>3</sub>)**

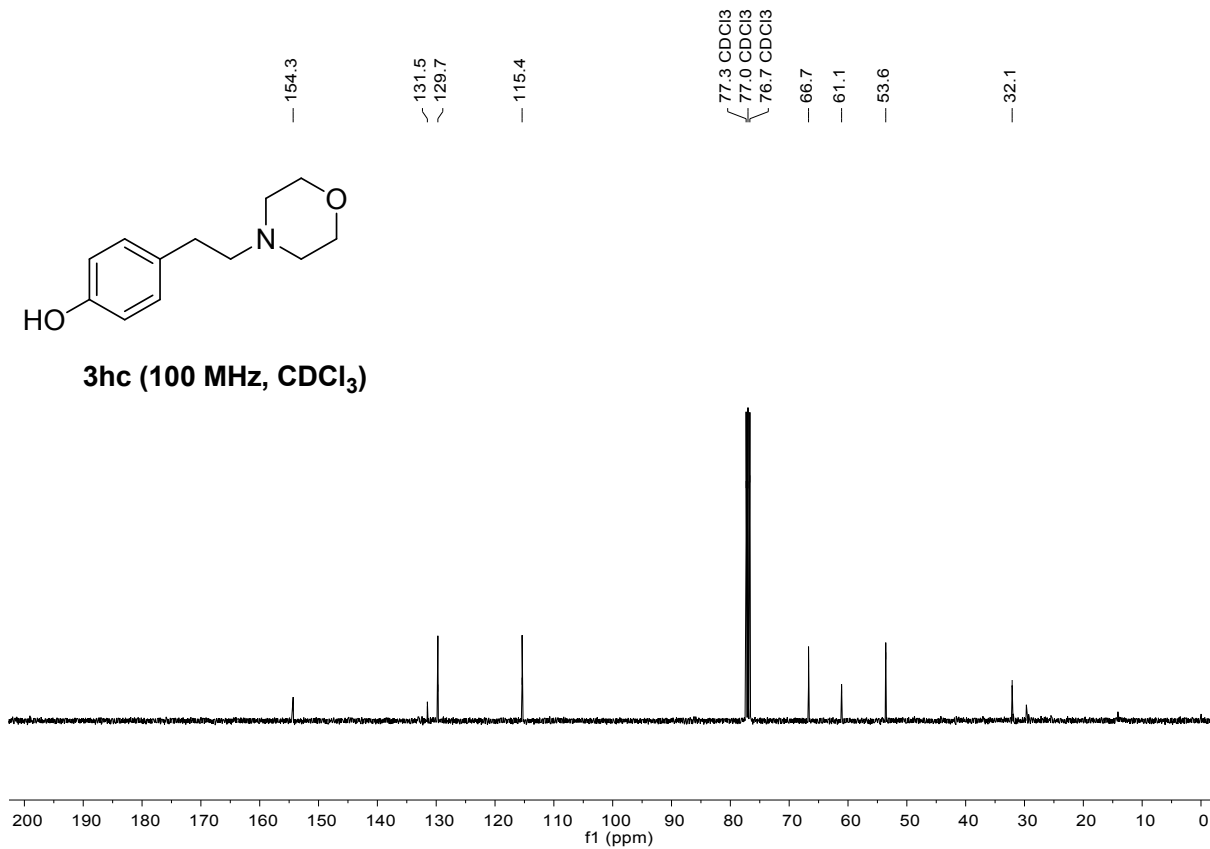

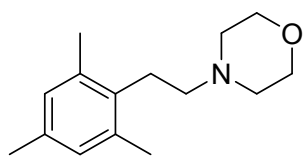

**3ic (400 MHz, CDCl<sub>3</sub>)**

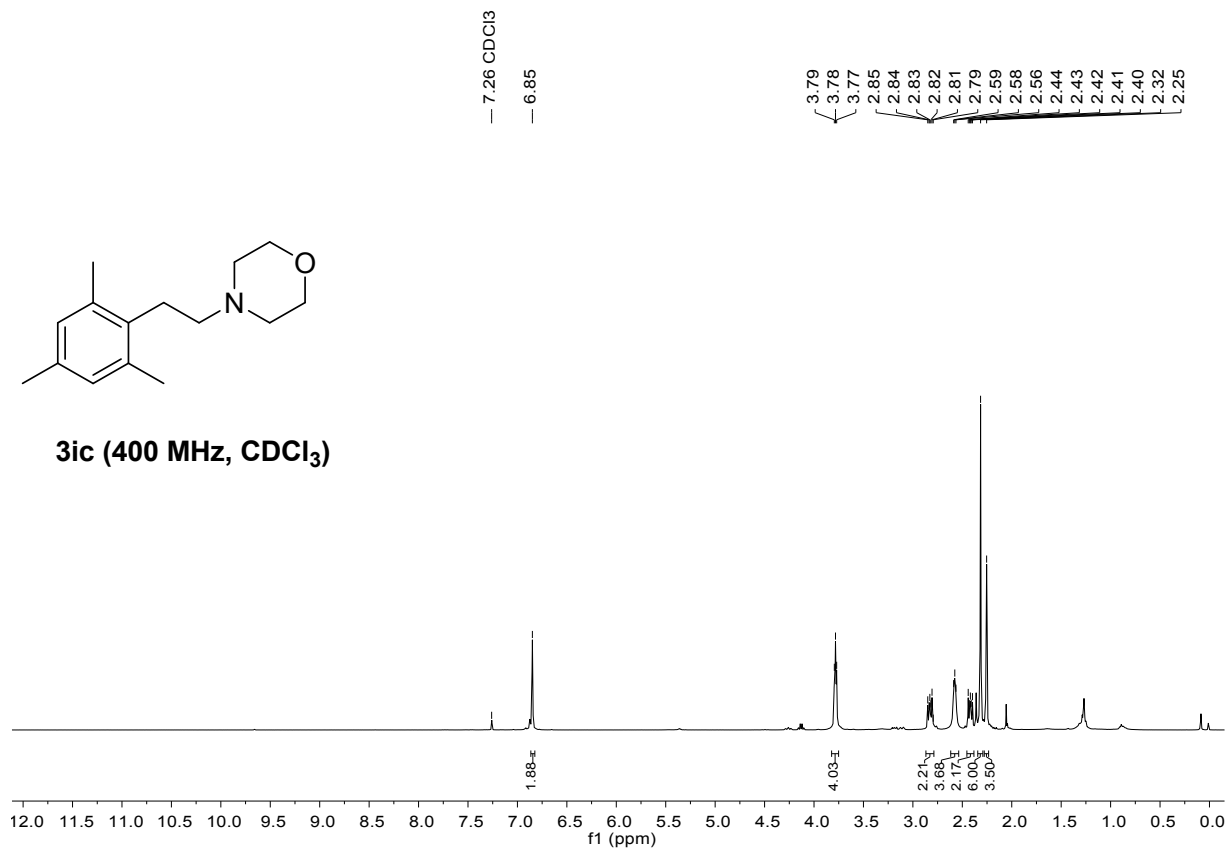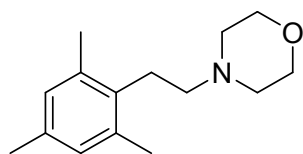

**3ic (100 MHz, CDCl<sub>3</sub>)**

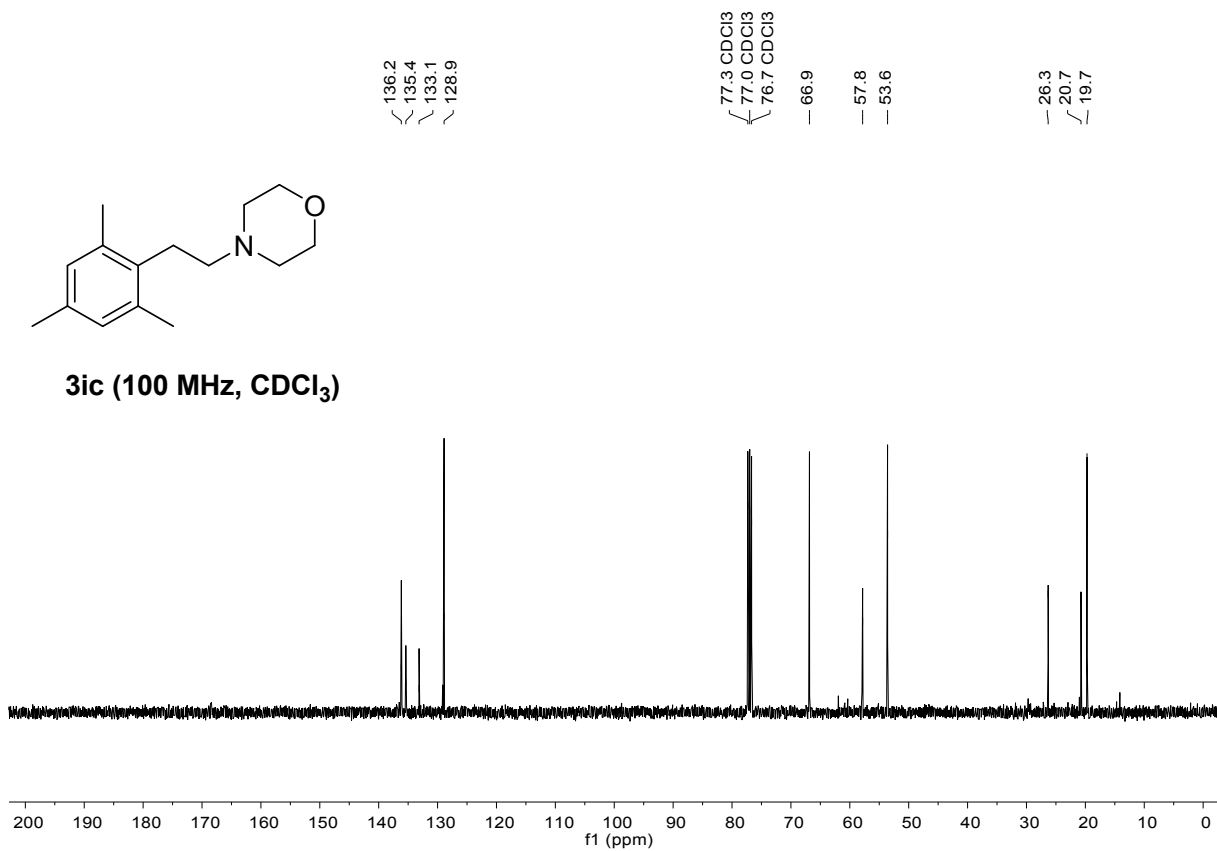

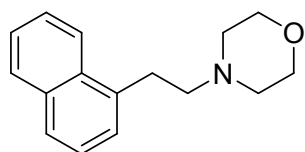

**3jc (100 MHz, CDCl<sub>3</sub>)**

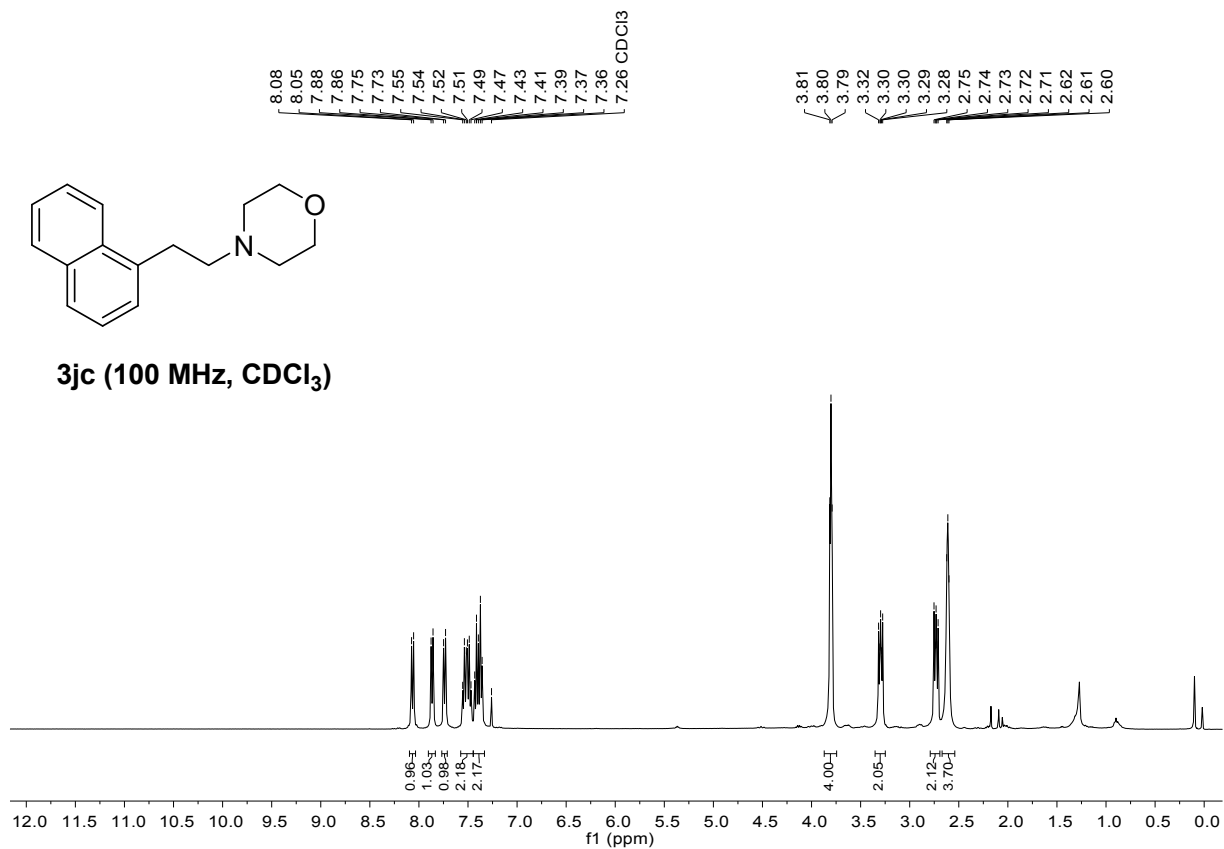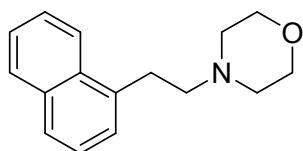

**3jc (100 MHz, CDCl<sub>3</sub>)**

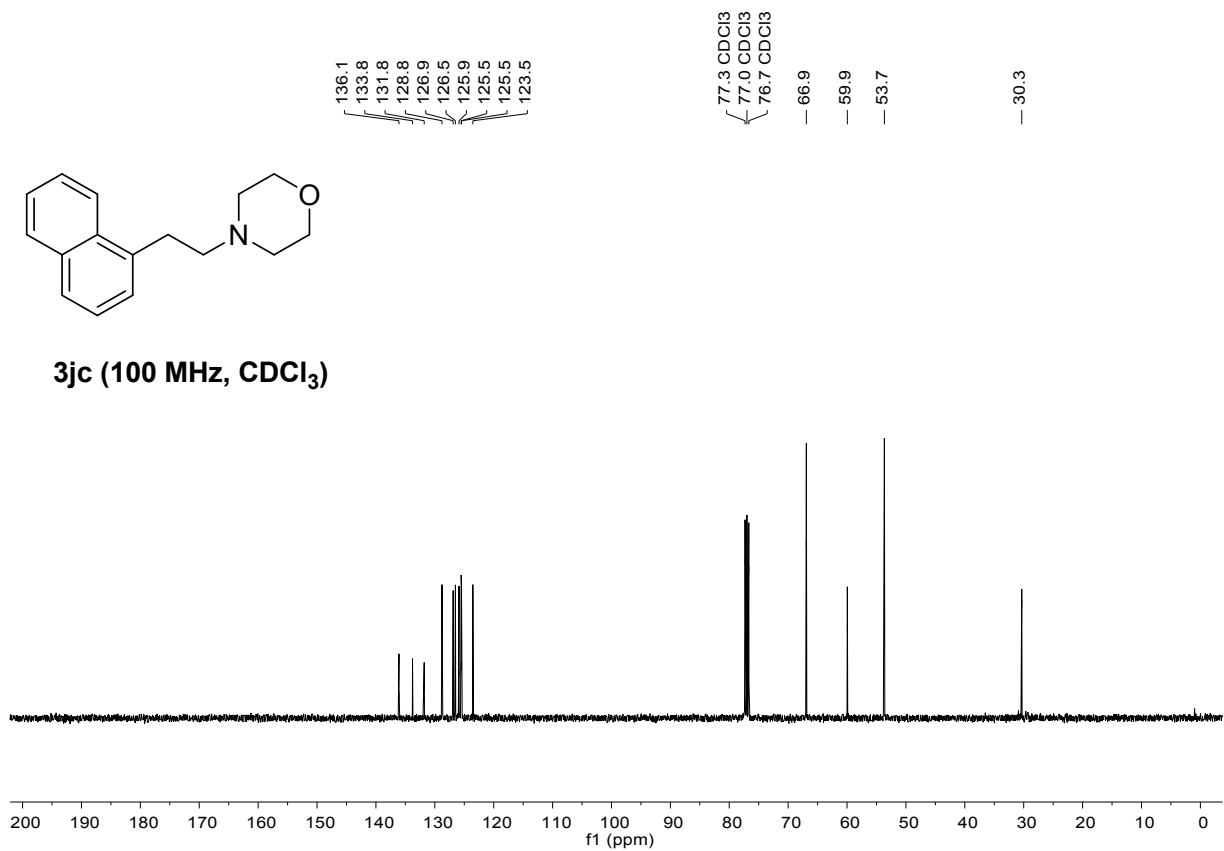

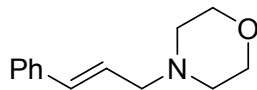

**3kc (400 MHz, CDCl<sub>3</sub>)**

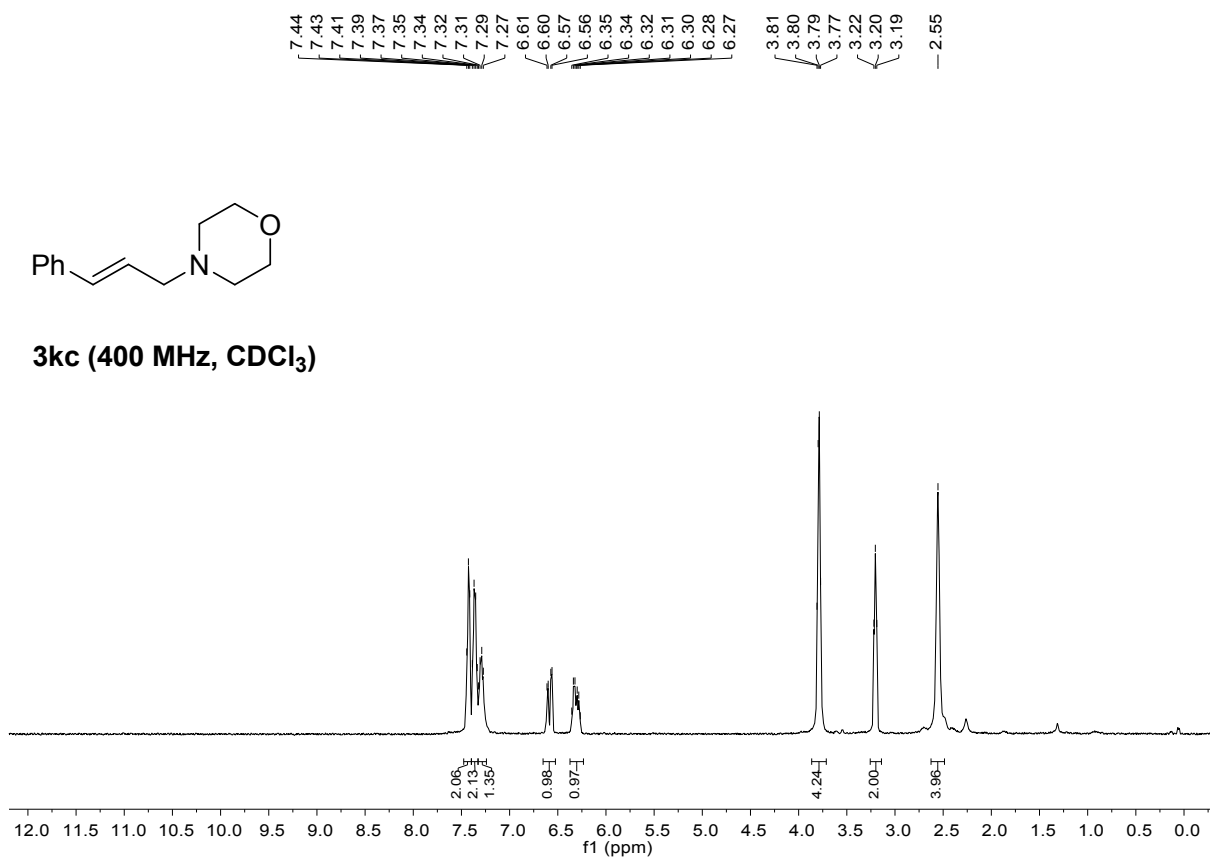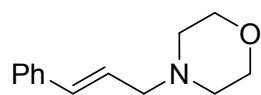

**3kc (100 MHz, CDCl<sub>3</sub>)**

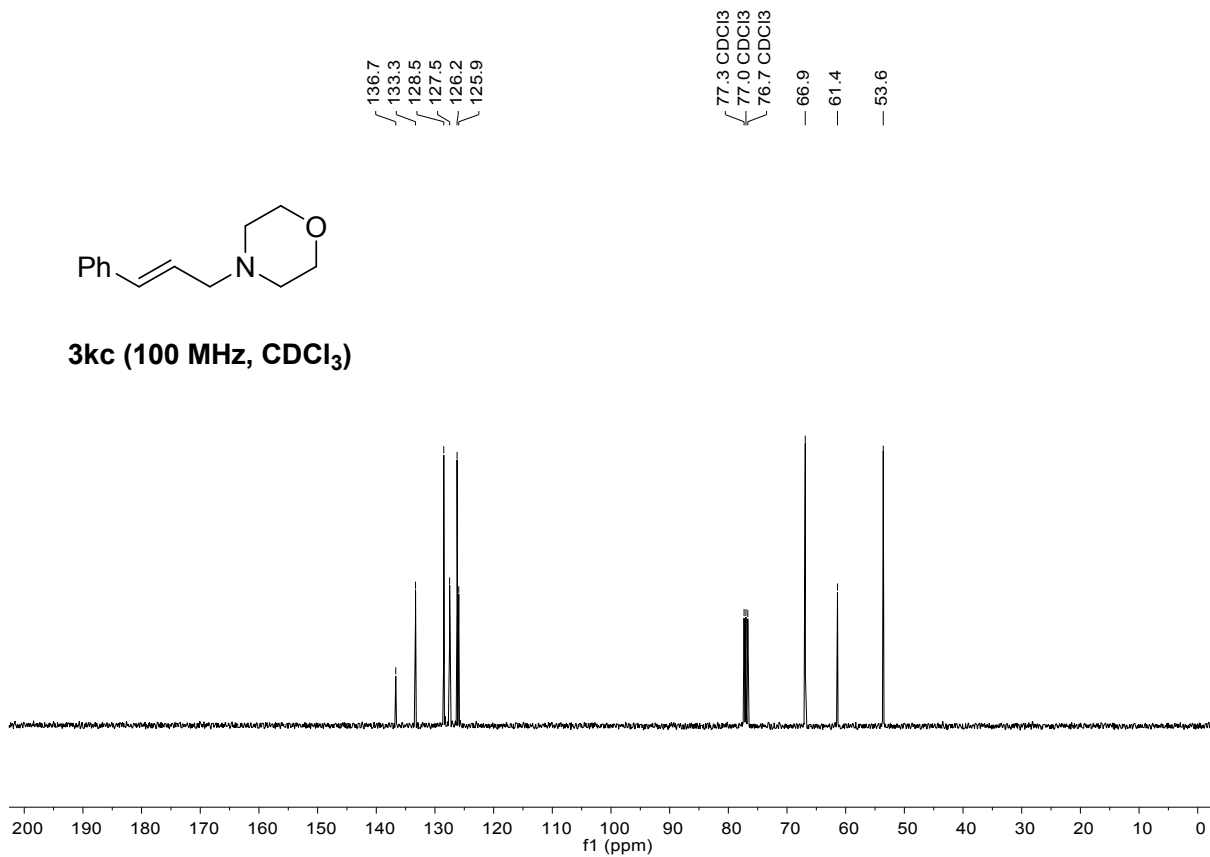

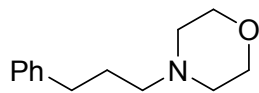

**3lc (400 MHz, CDCl<sub>3</sub>)**

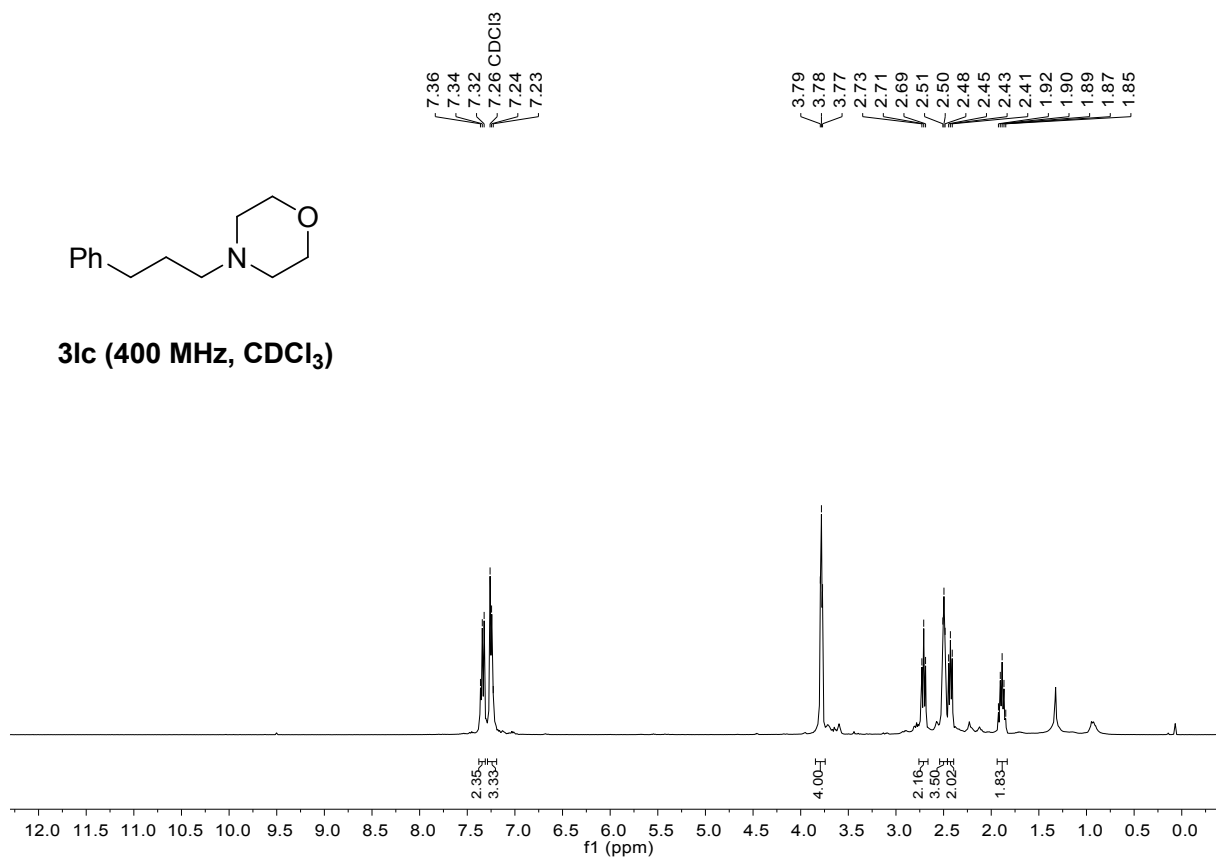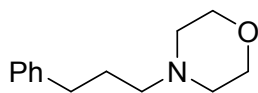

**3lc (100 MHz, CDCl<sub>3</sub>)**

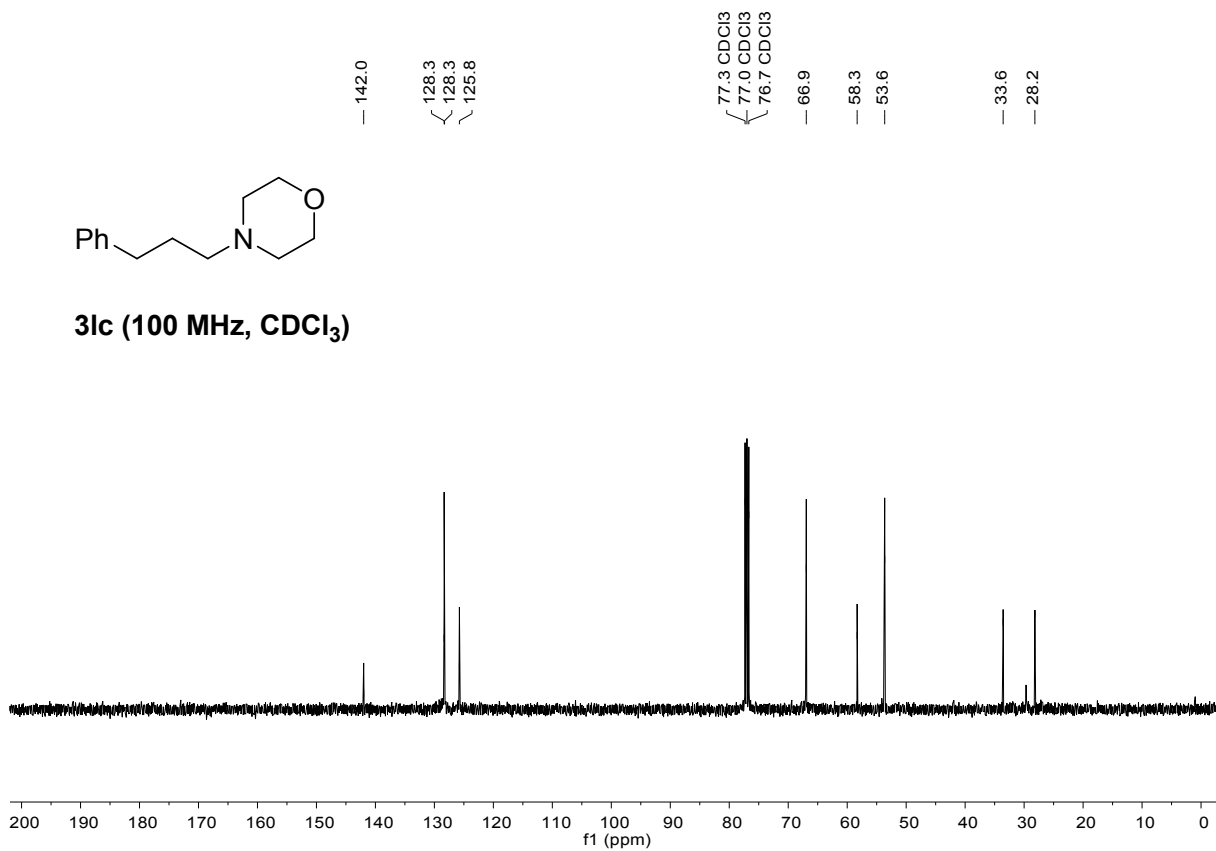

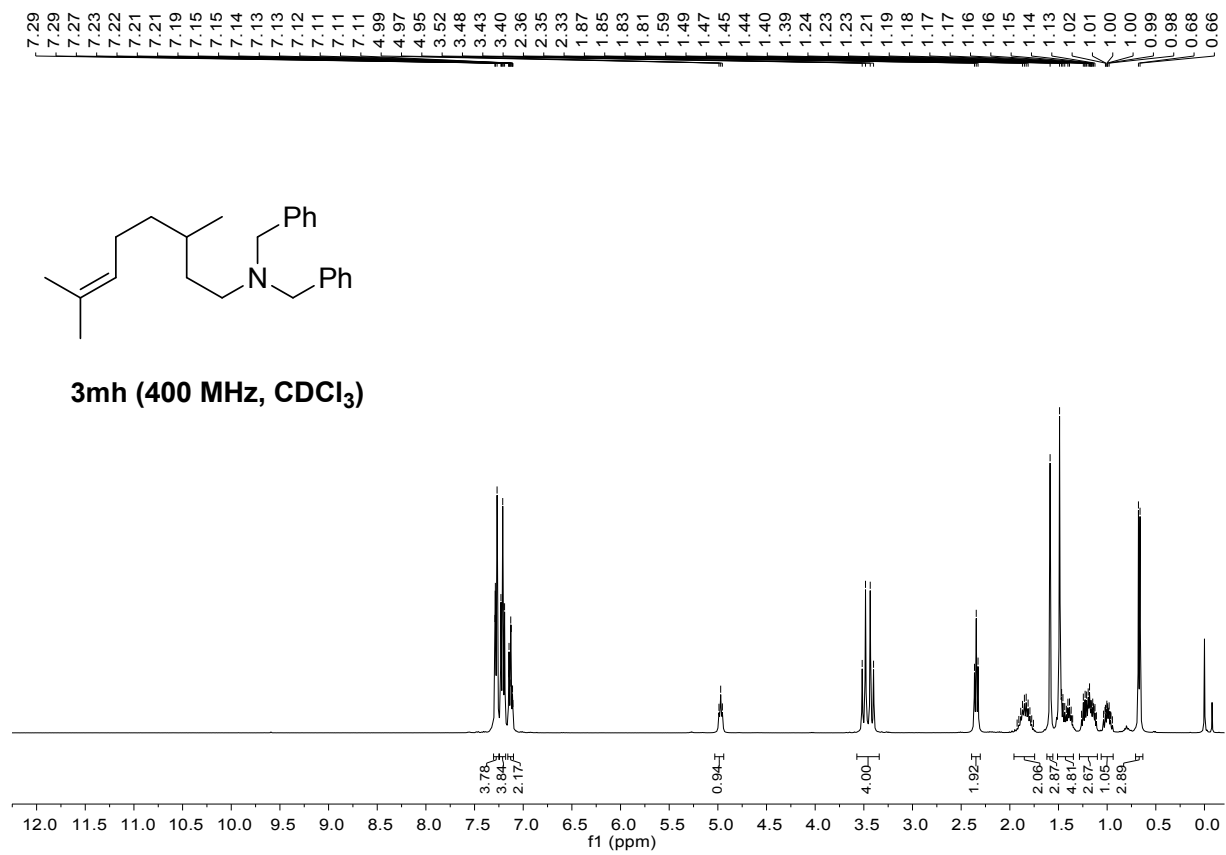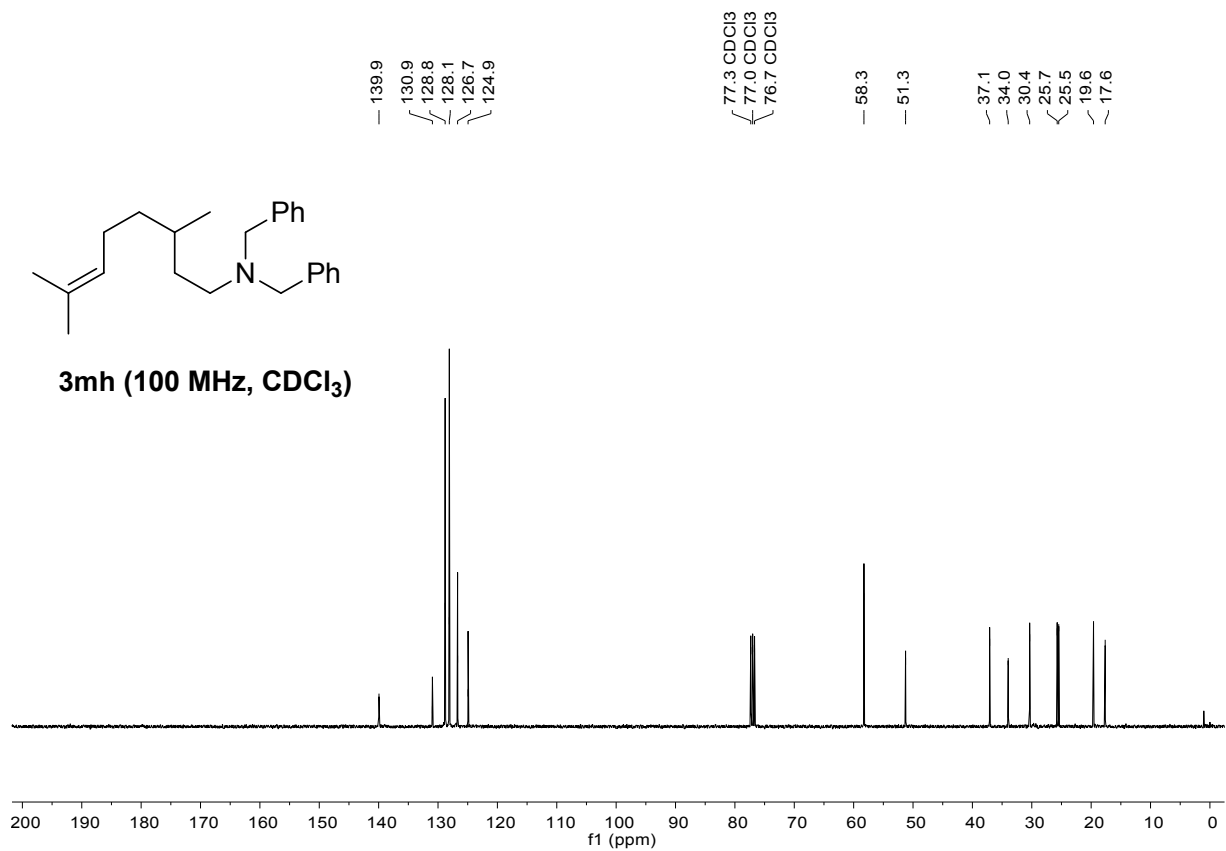



7.23  
7.21  
7.19  
7.17  
7.16  
7.15  
7.14  
7.14  
7.13  
7.12  
7.12  
7.11  
7.11  
6.62  
6.60  
6.59  
6.58  
6.57

3.44  
3.42  
3.40  
3.38  
3.33  
3.31  
3.29  
3.27  
3.16  
3.15  
3.13  
3.11  
3.09  
3.07  
2.66  
1.22  
1.21

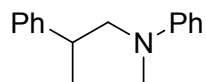

**3ns (400 MHz, CDCl<sub>3</sub>)**

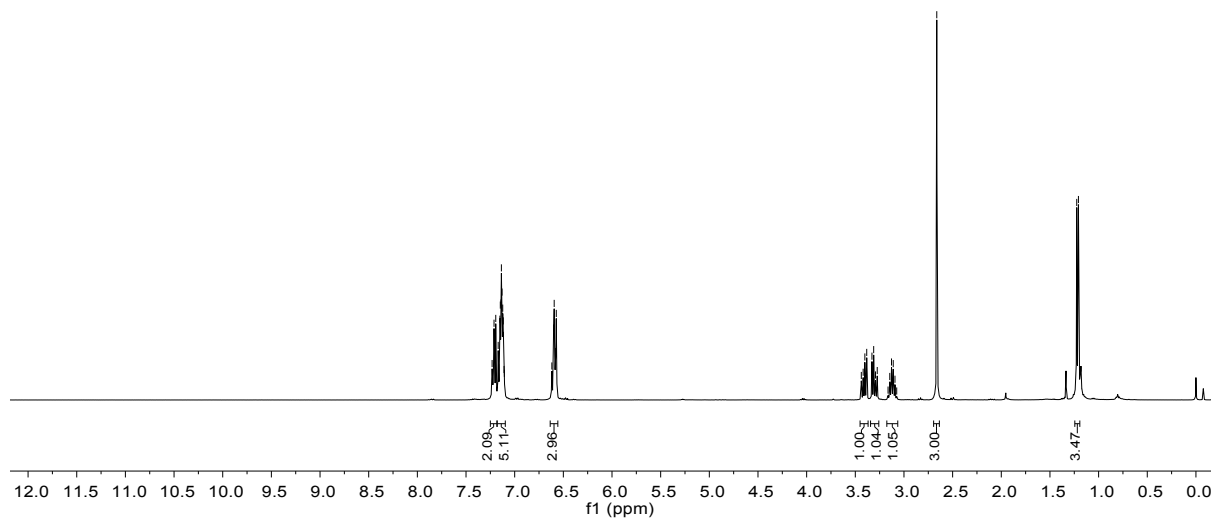

148.9  
145.1  
129.1  
128.4  
127.2  
126.3  
115.7  
111.7  
77.3 CDCl<sub>3</sub>  
77.0 CDCl<sub>3</sub>  
76.7 CDCl<sub>3</sub>  
60.9  
39.5  
38.2  
18.8

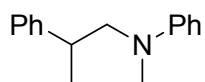

**3ns (100 MHz, CDCl<sub>3</sub>)**

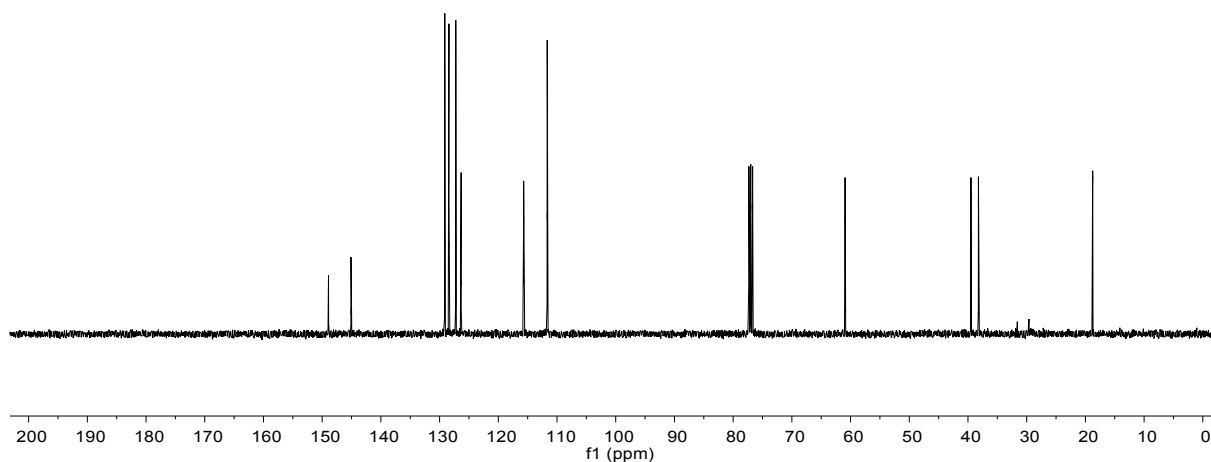

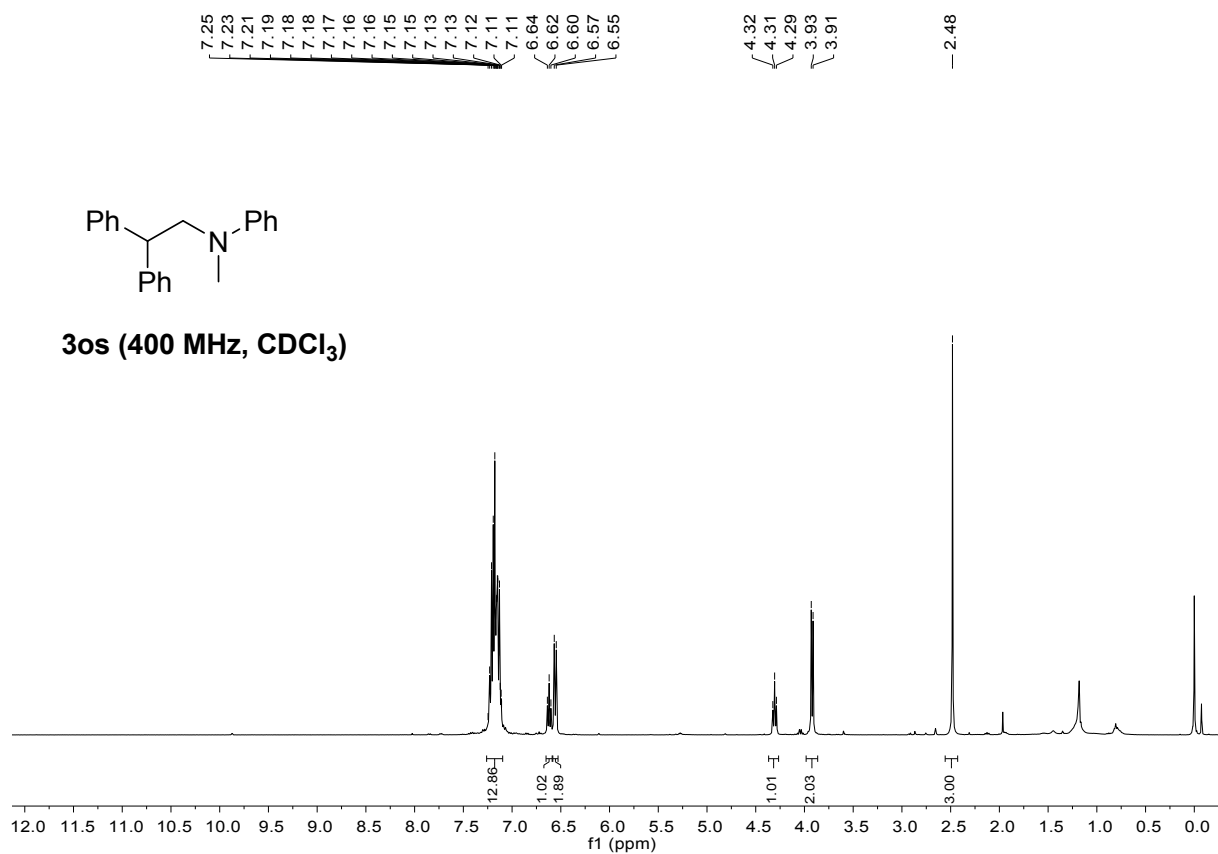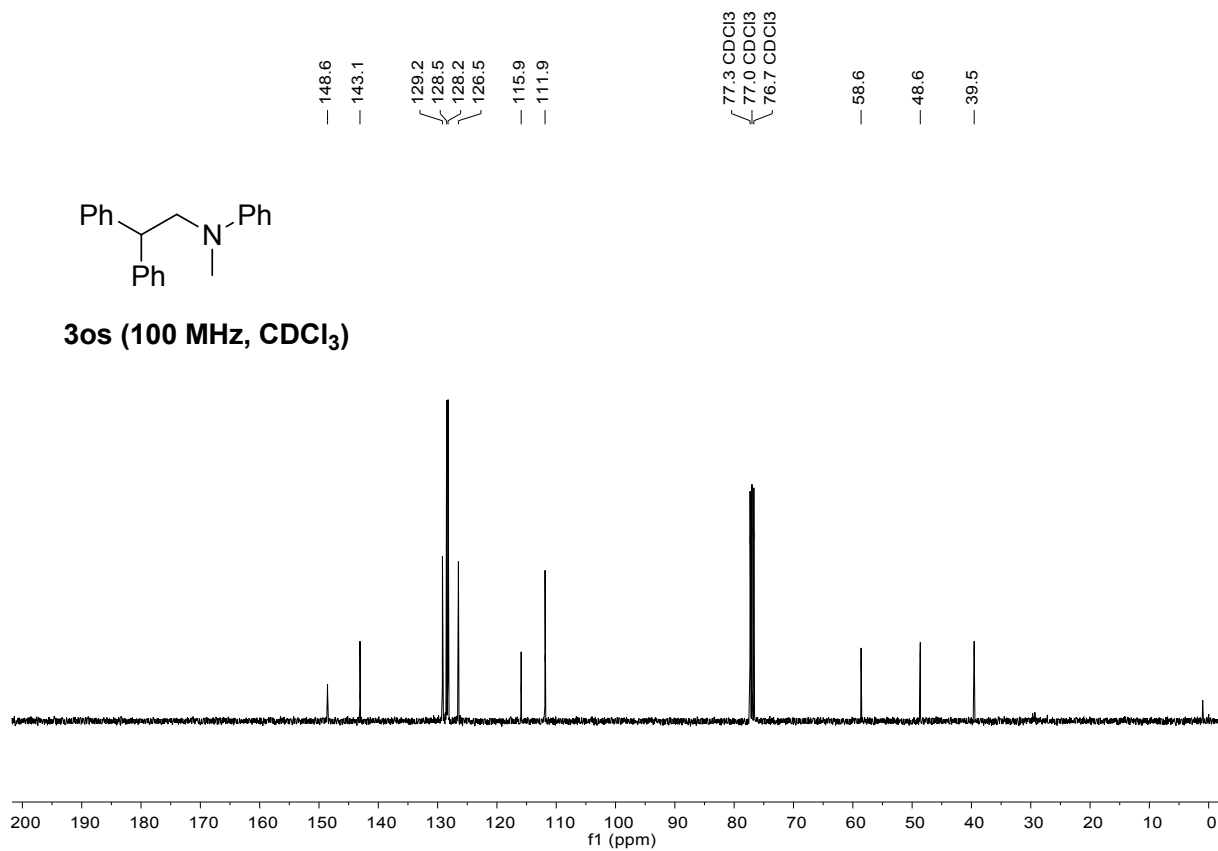

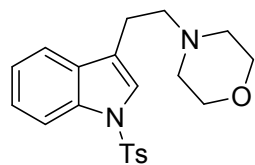

**3pc (400 MHz, CDCl<sub>3</sub>)**

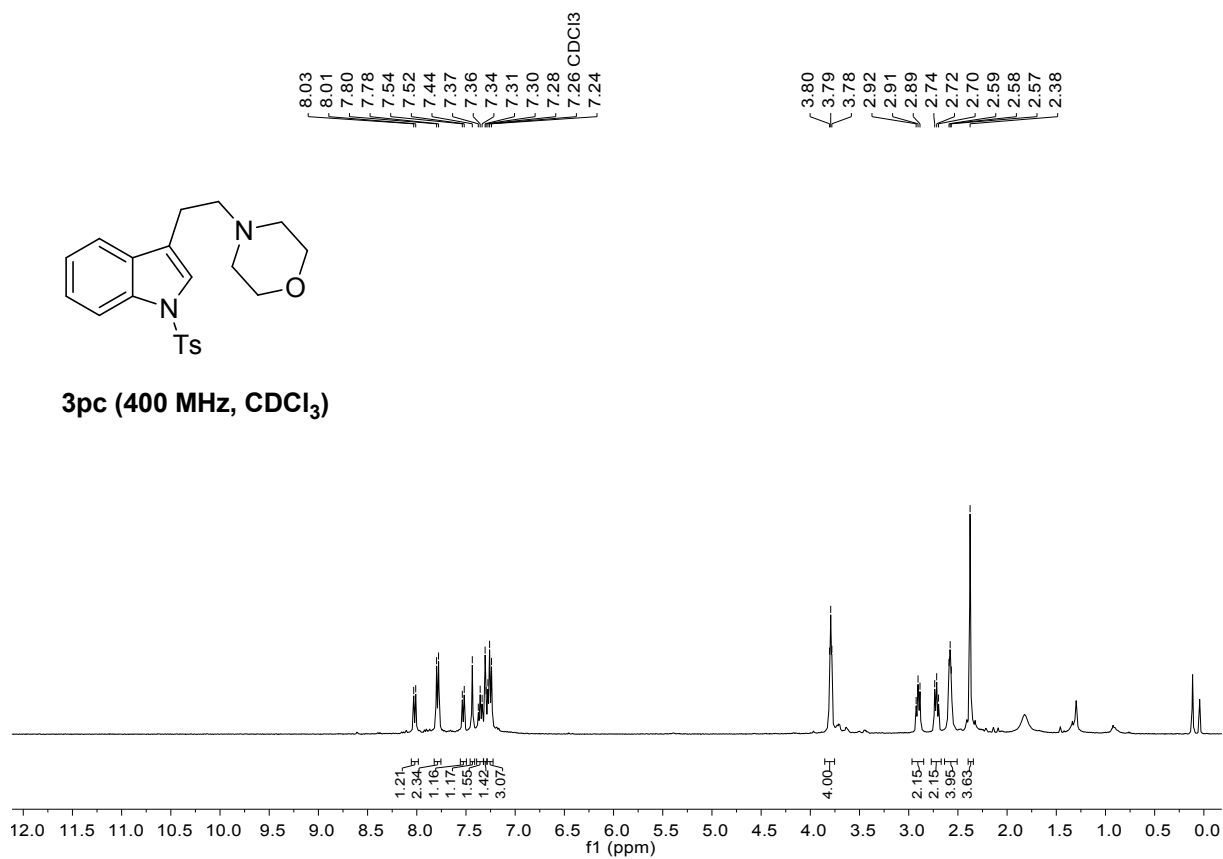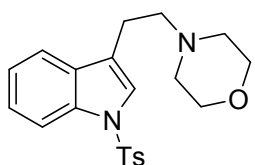

**3pc (100 MHz, CDCl<sub>3</sub>)**

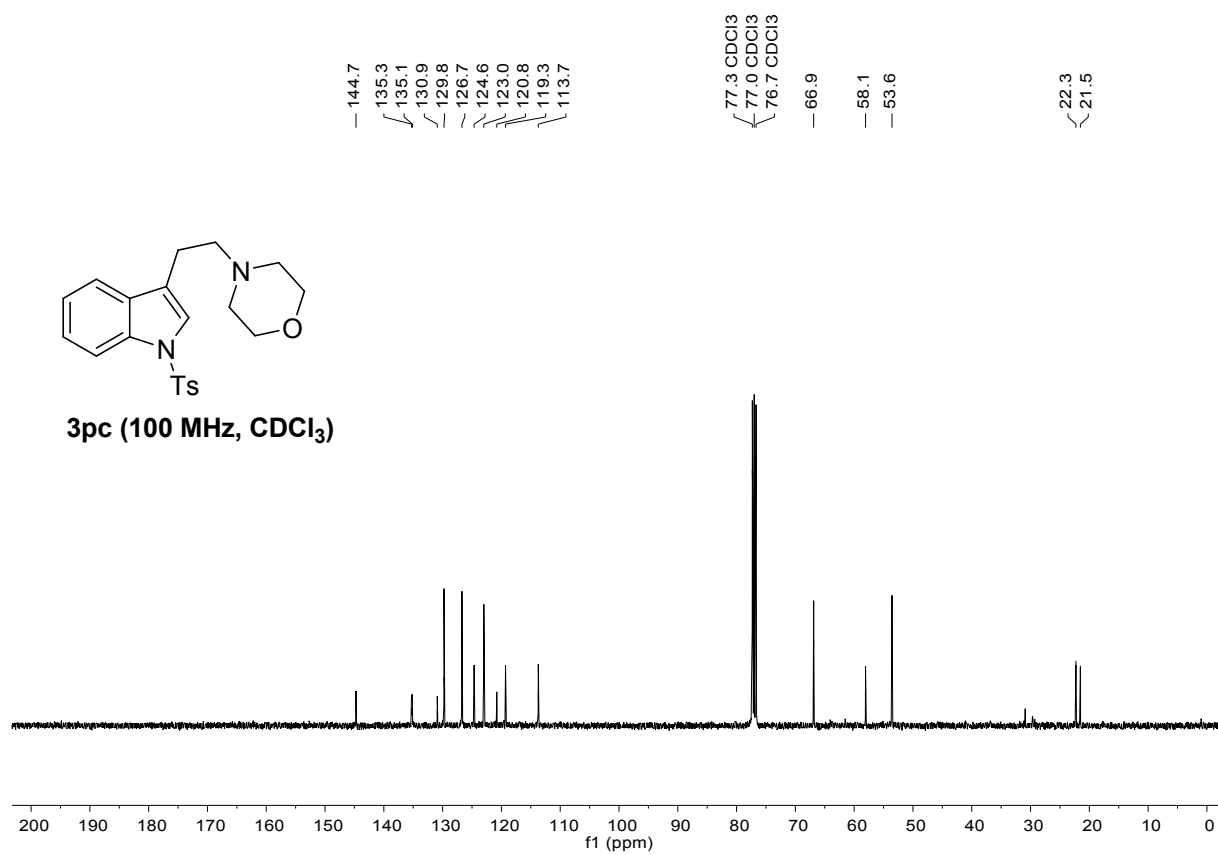

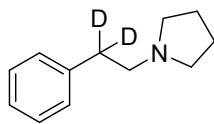

**3aa-d (400 MHz, CDCl<sub>3</sub>)**

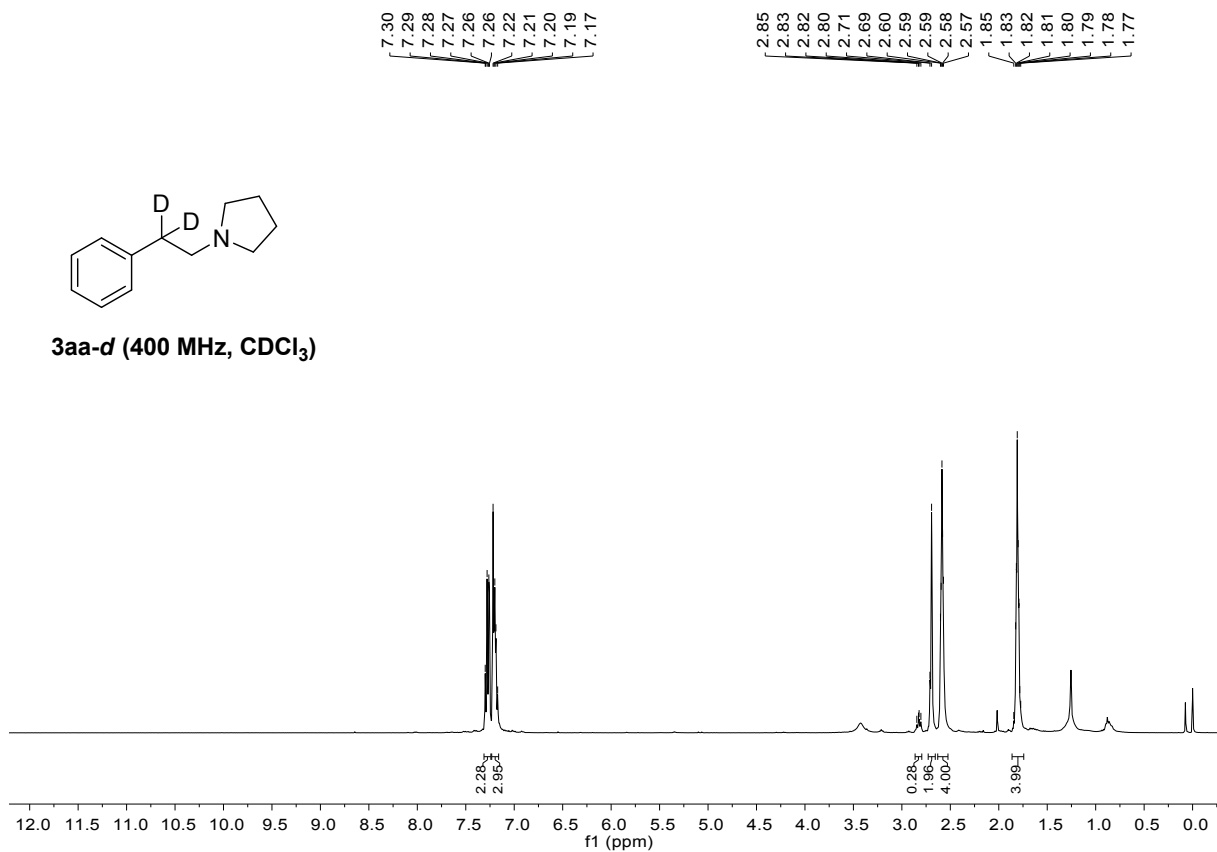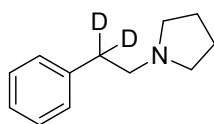

**3aa-d (100 MHz, CDCl<sub>3</sub>)**

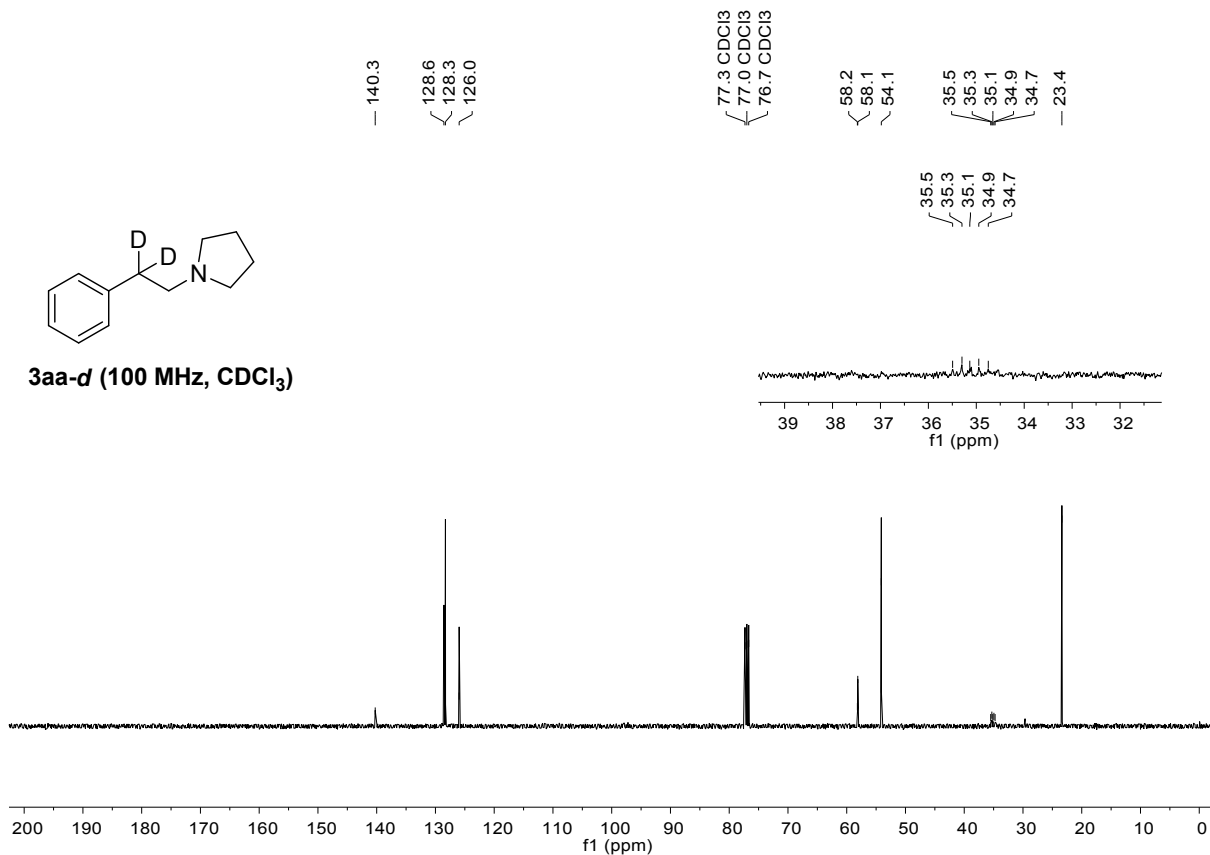

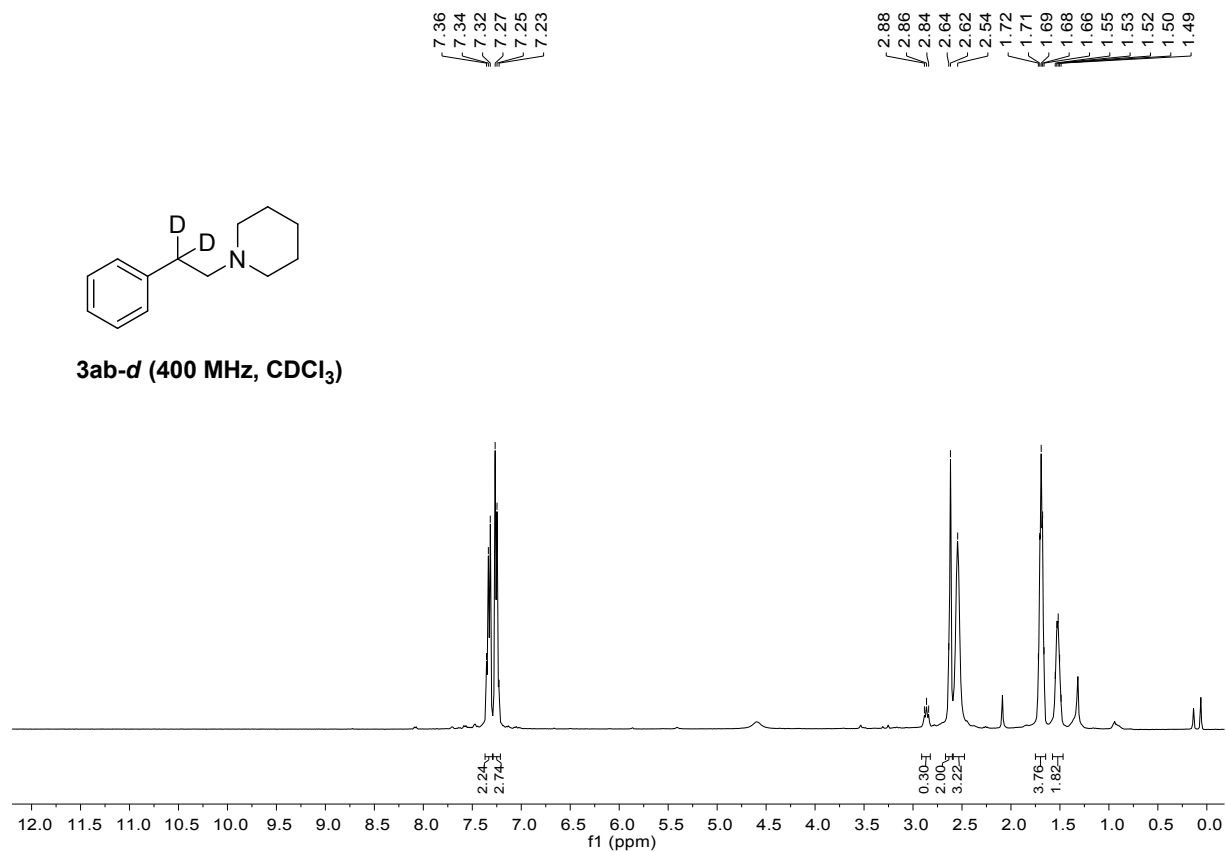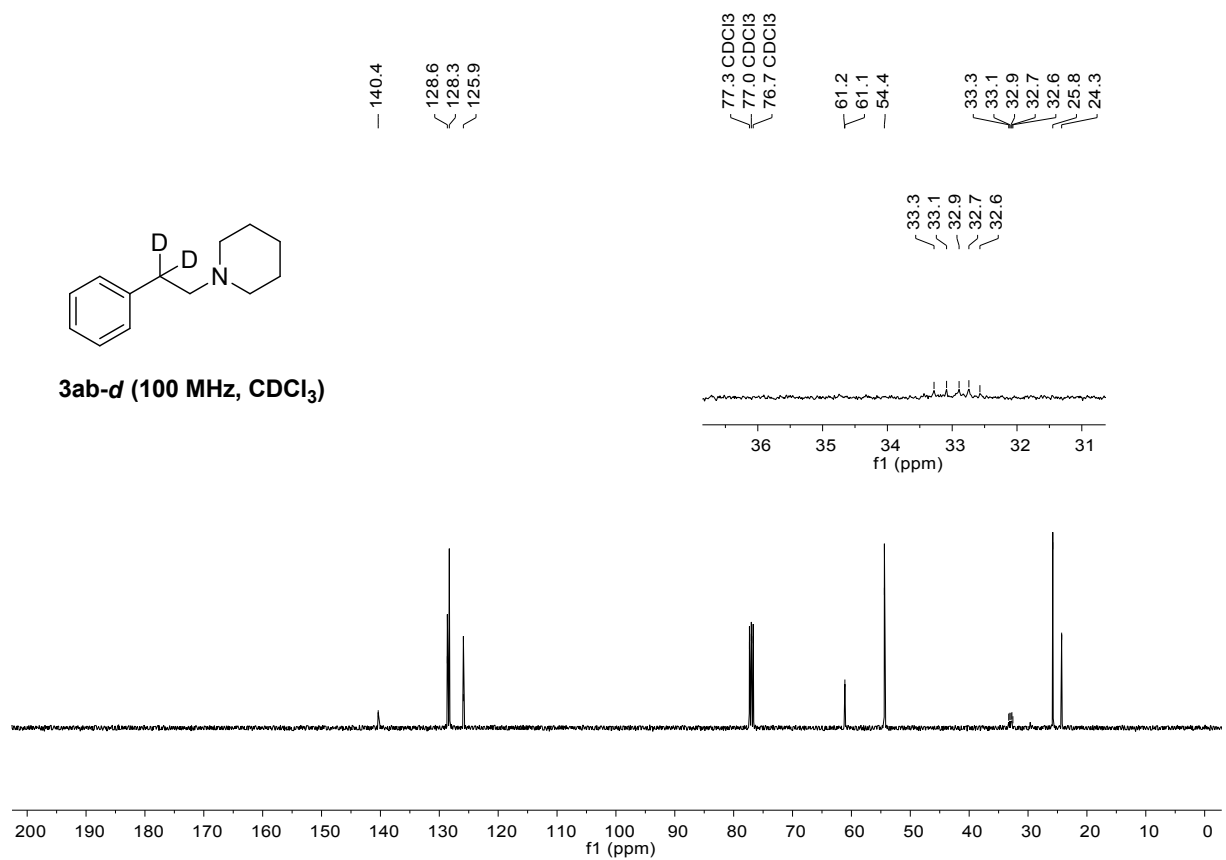

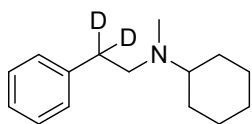

**3ag-d (400 MHz, CDCl<sub>3</sub>)**

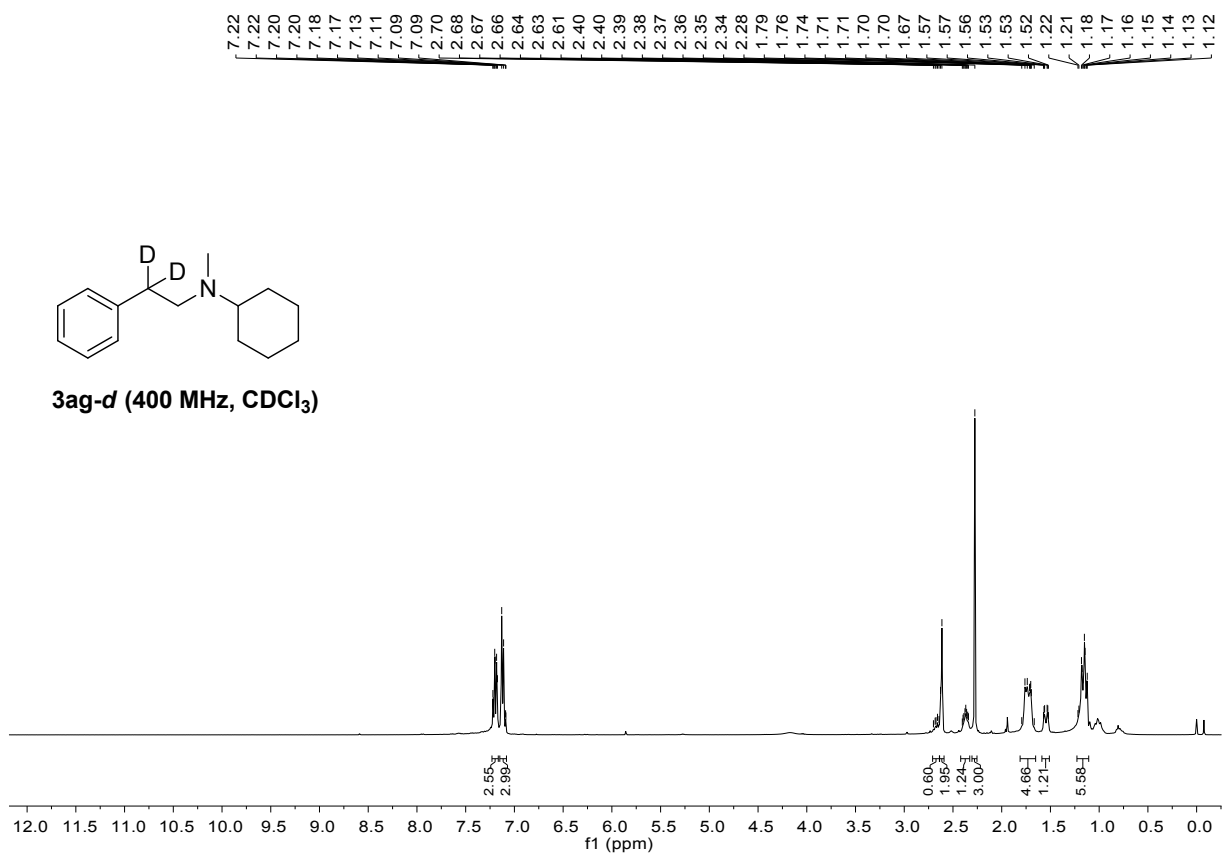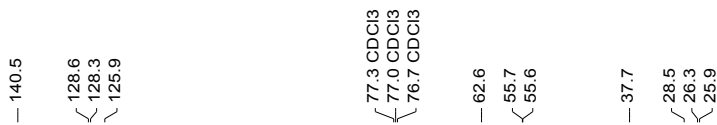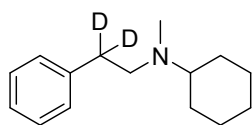

**3ag-d (100 MHz, CDCl<sub>3</sub>)**

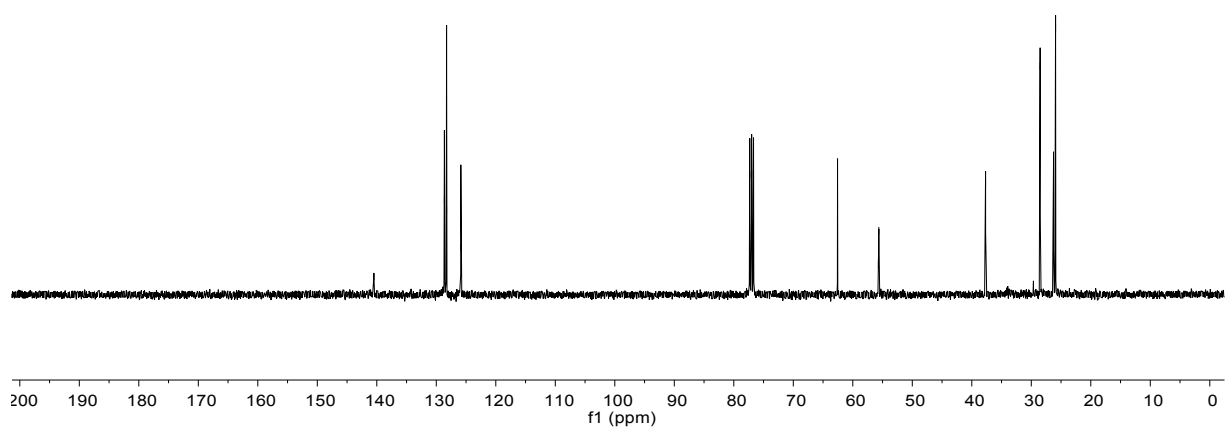

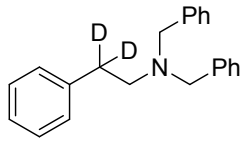

**3dh-d (400 MHz, CDCl<sub>3</sub>)**

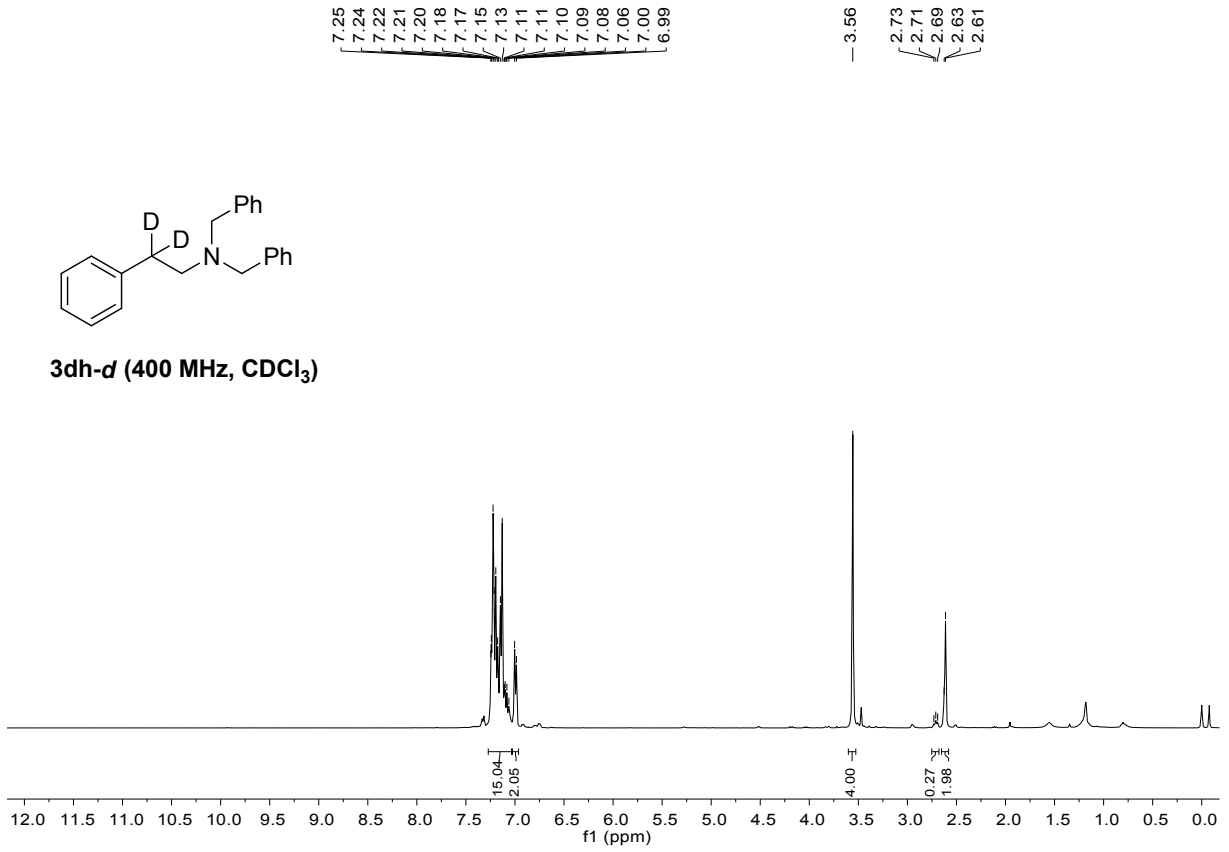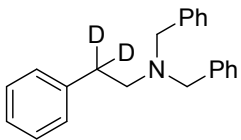

**3dh-d (100 MHz, CDCl<sub>3</sub>)**

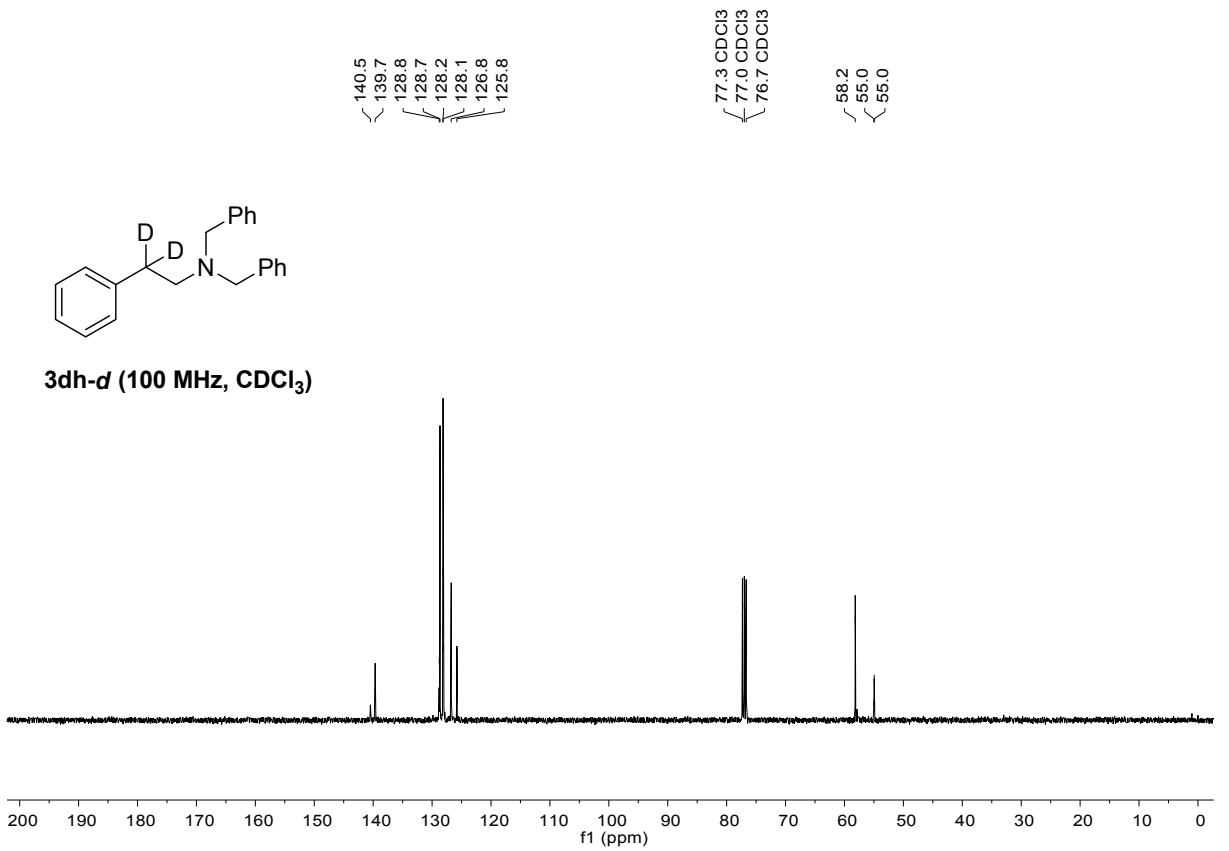

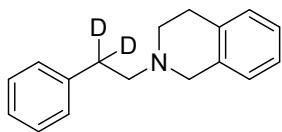

**3af-d (400 MHz, CDCl<sub>3</sub>)**

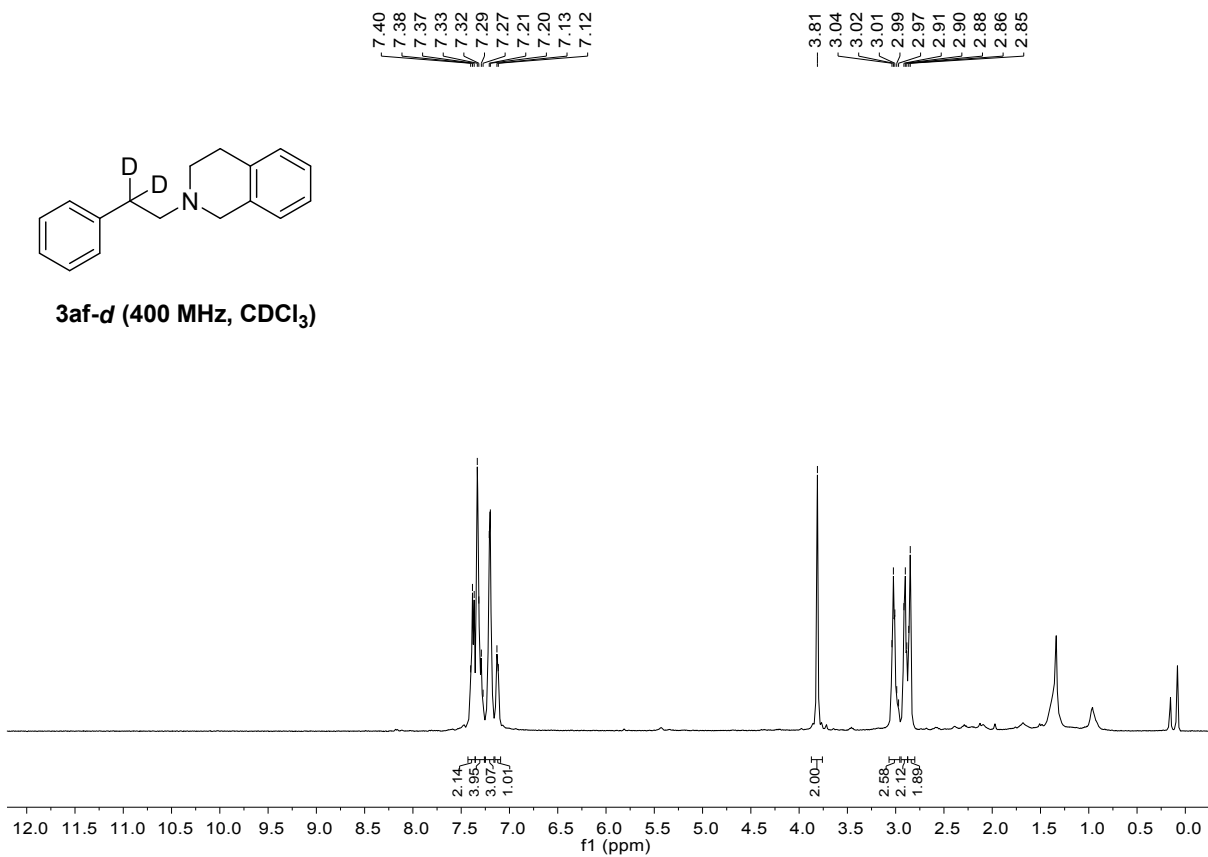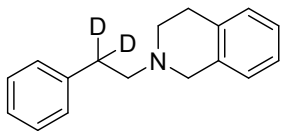

**3af-d (100 MHz, CDCl<sub>3</sub>)**

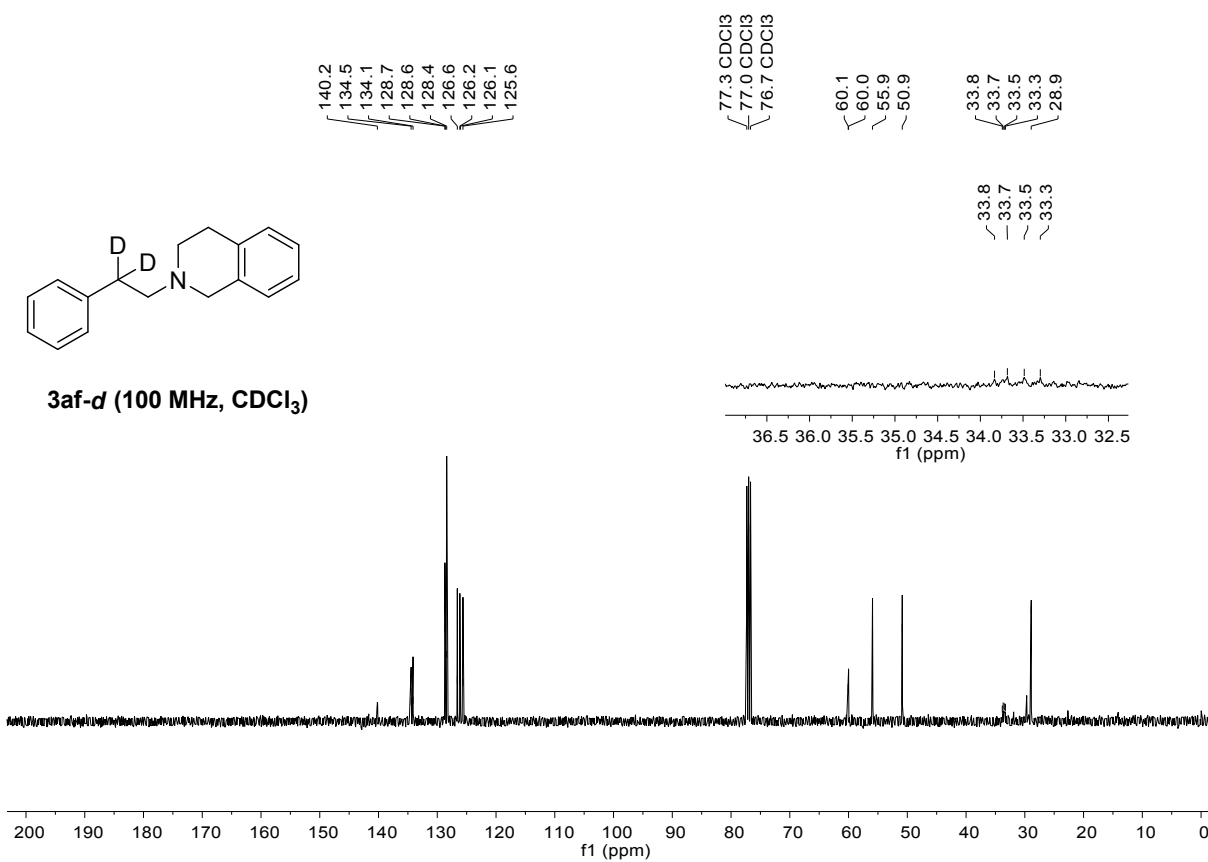



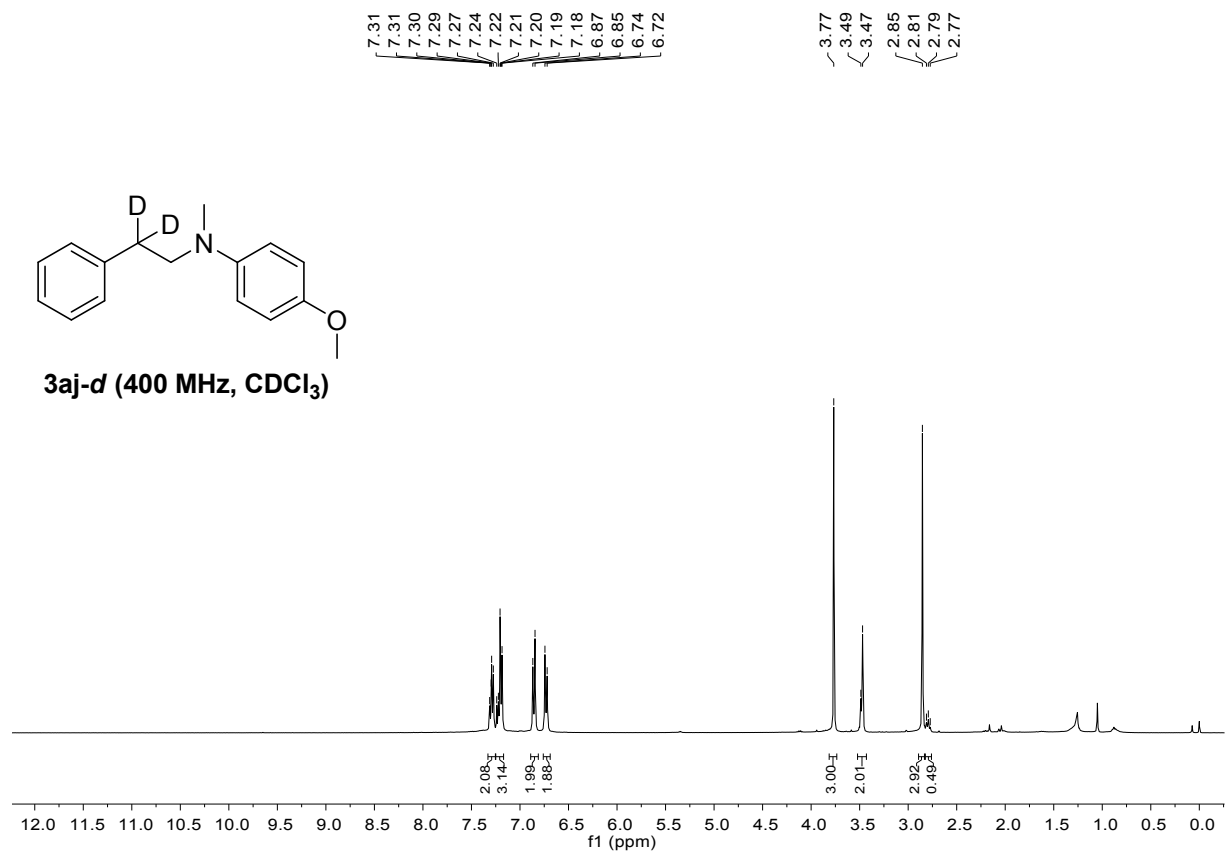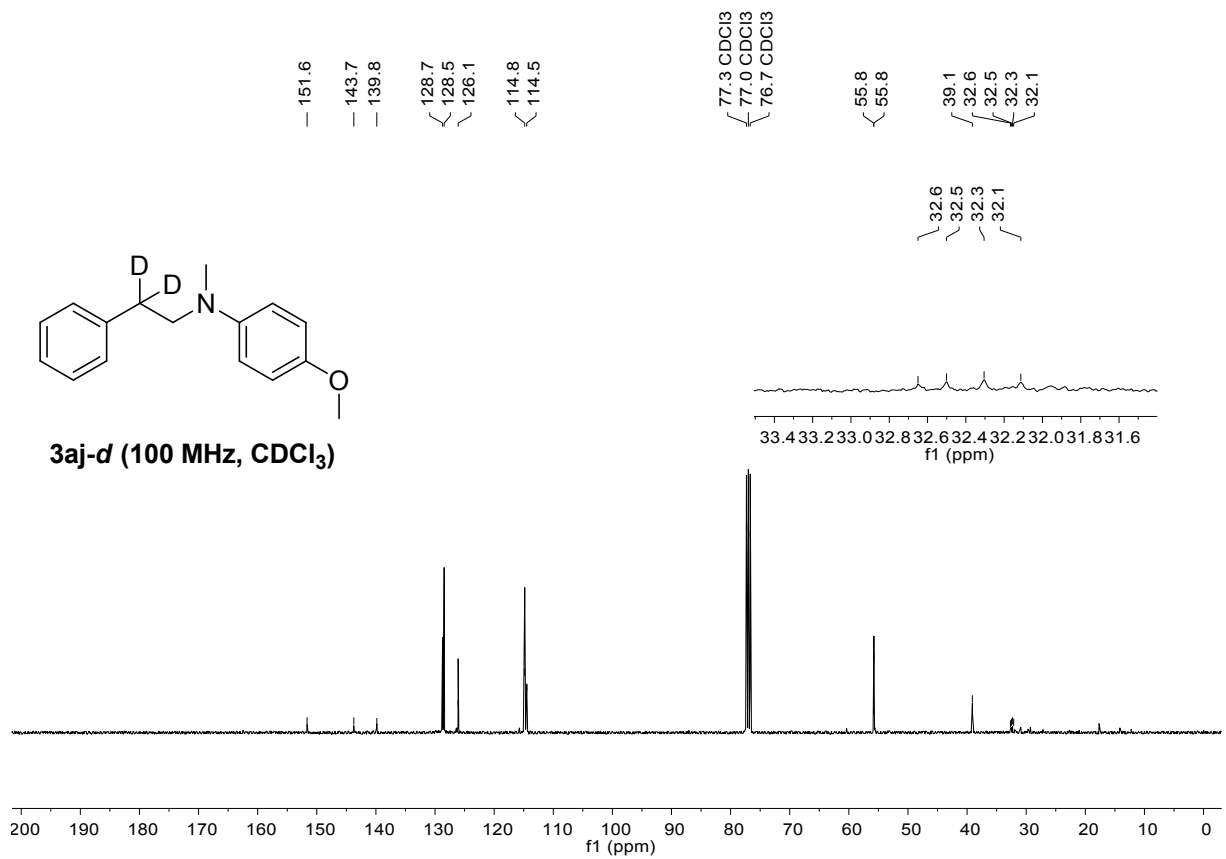

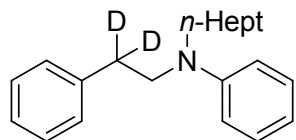

**3ap-d (400 MHz, CDCl<sub>3</sub>)**

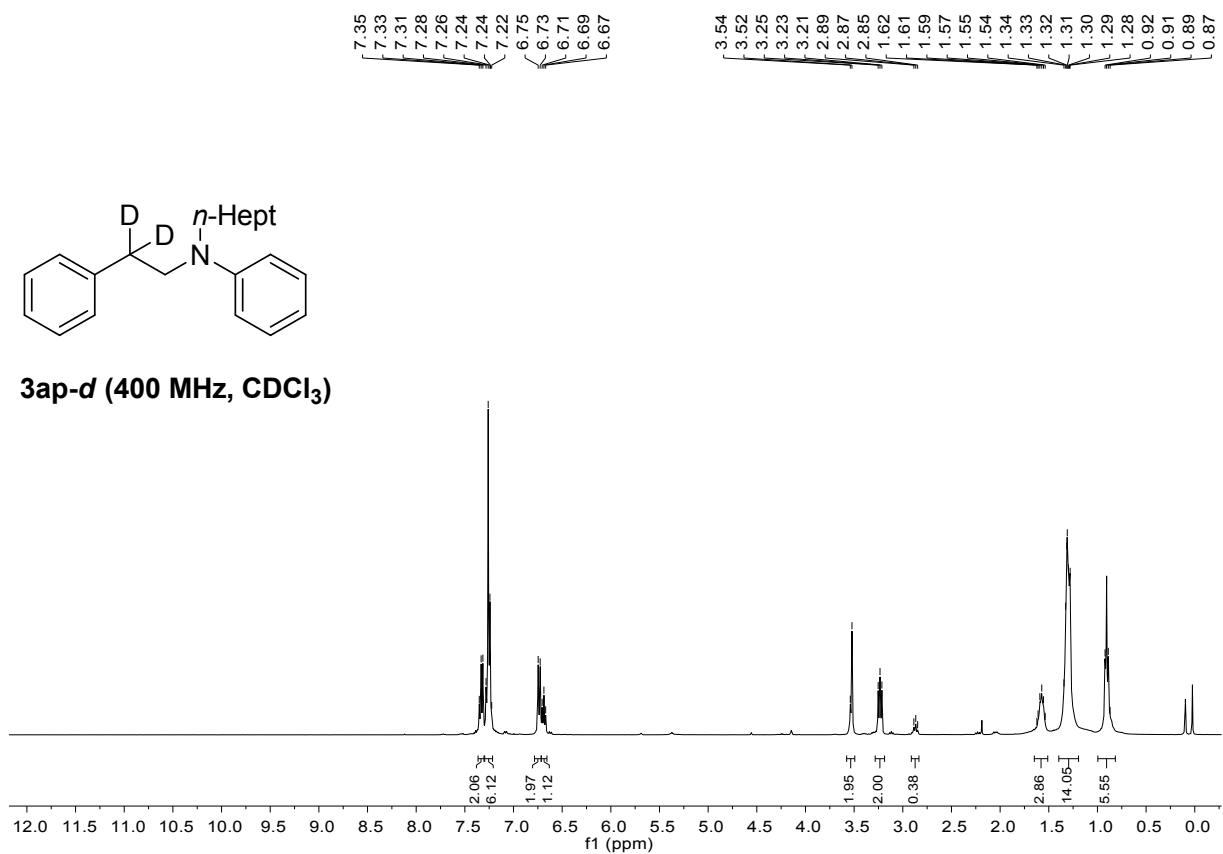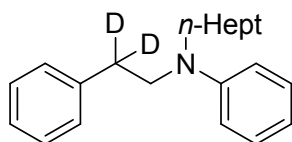

**3ap-d (100 MHz, CDCl<sub>3</sub>)**

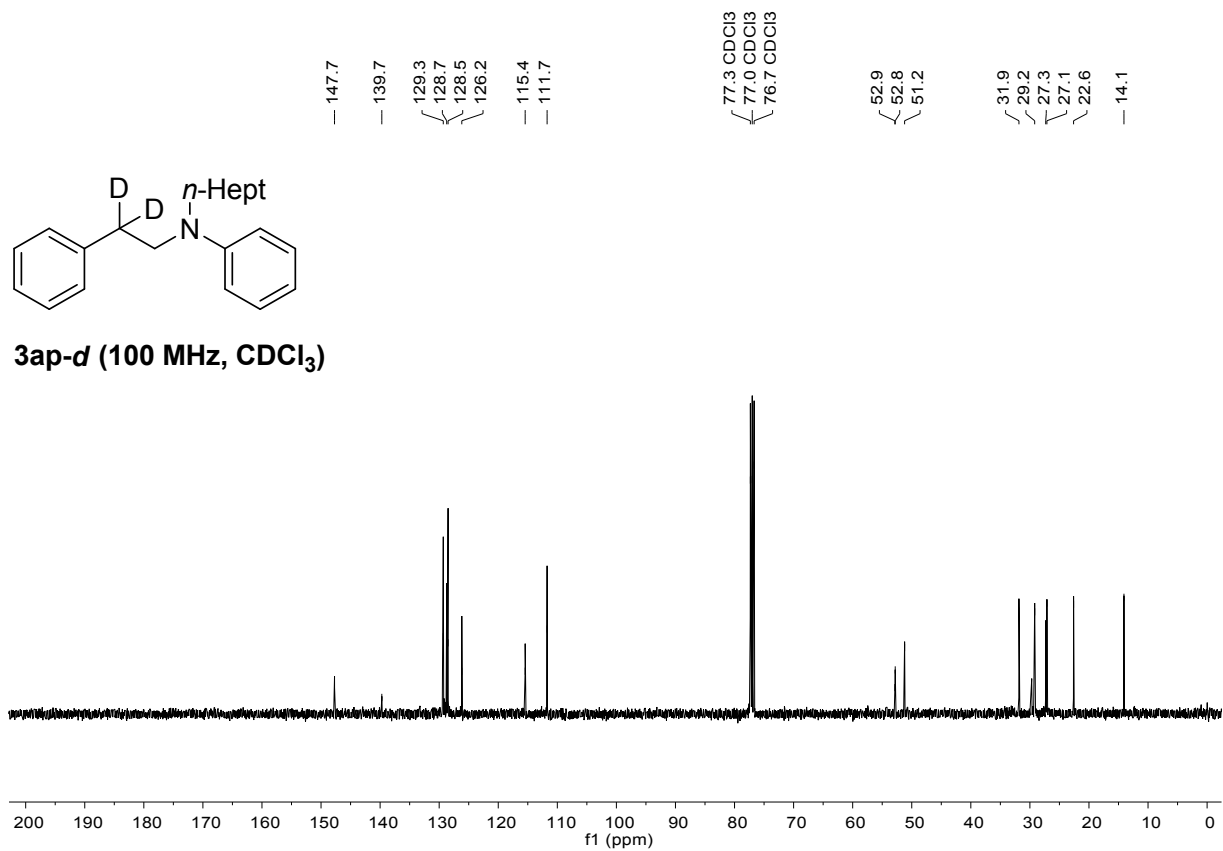

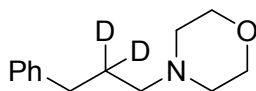

**3lc-d (400 MHz, CDCl<sub>3</sub>)**

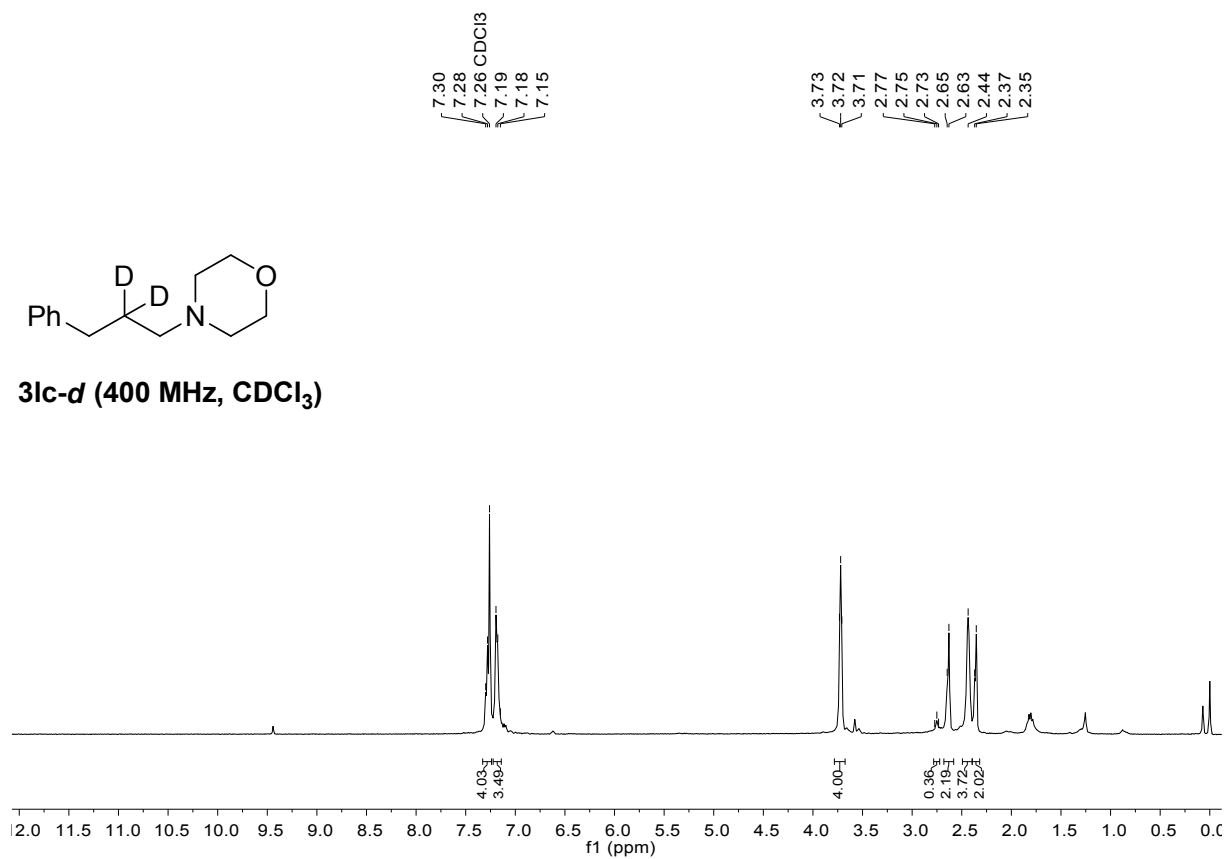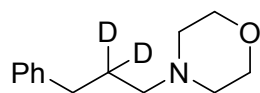

**3lc-d (100 MHz, CDCl<sub>3</sub>)**

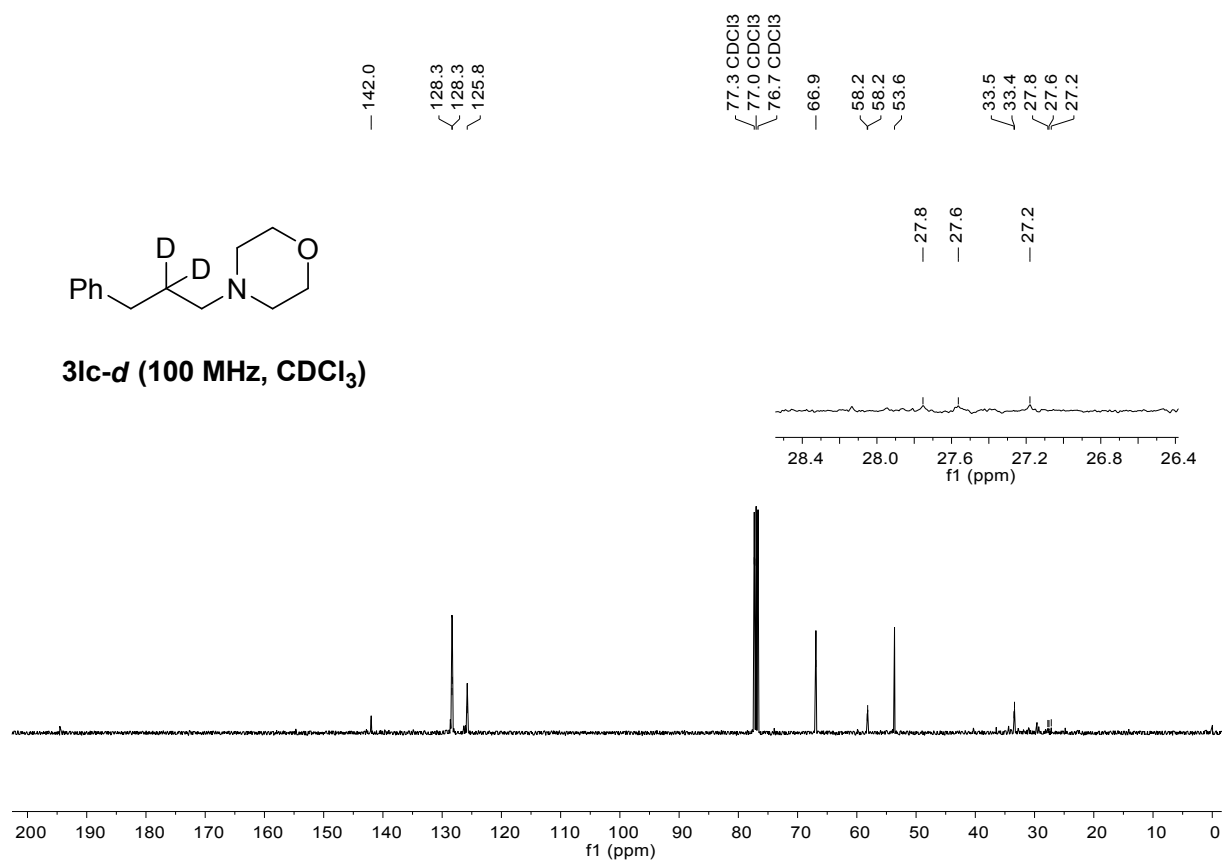

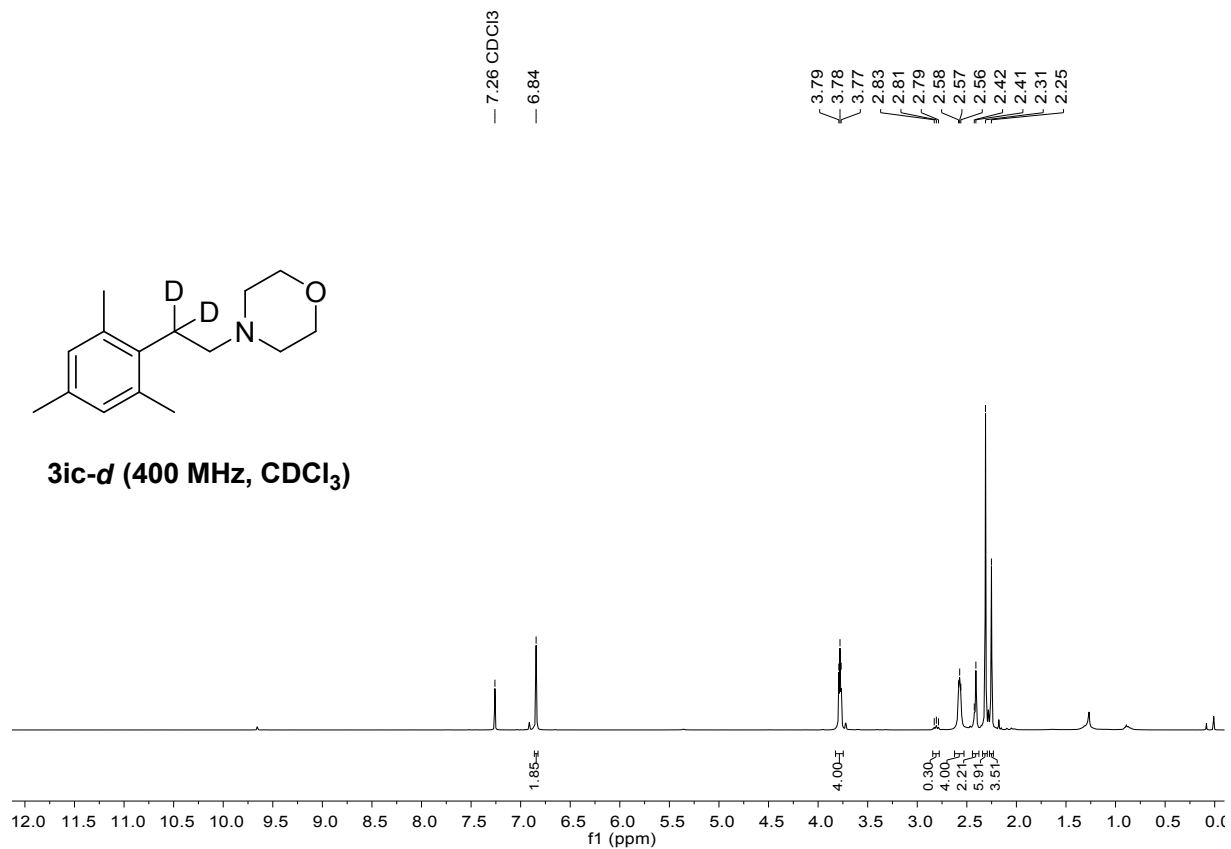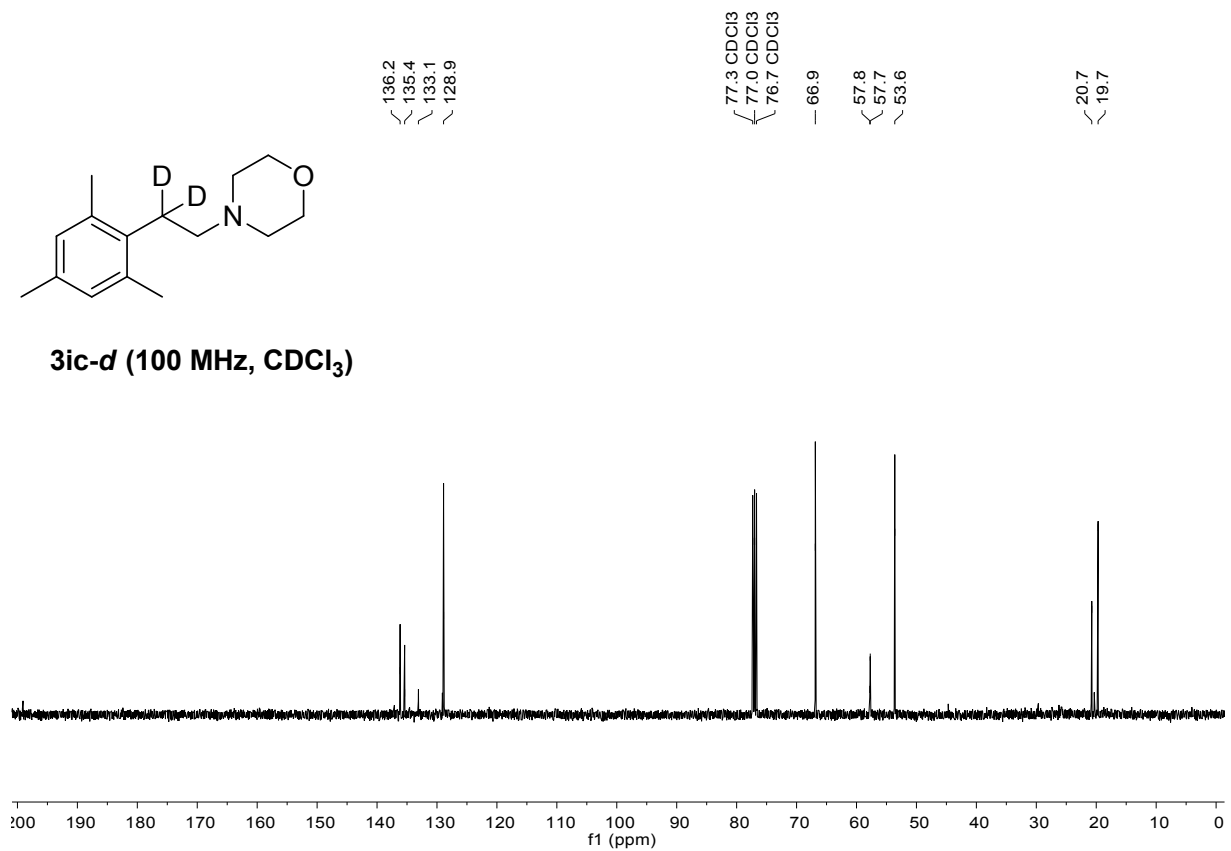

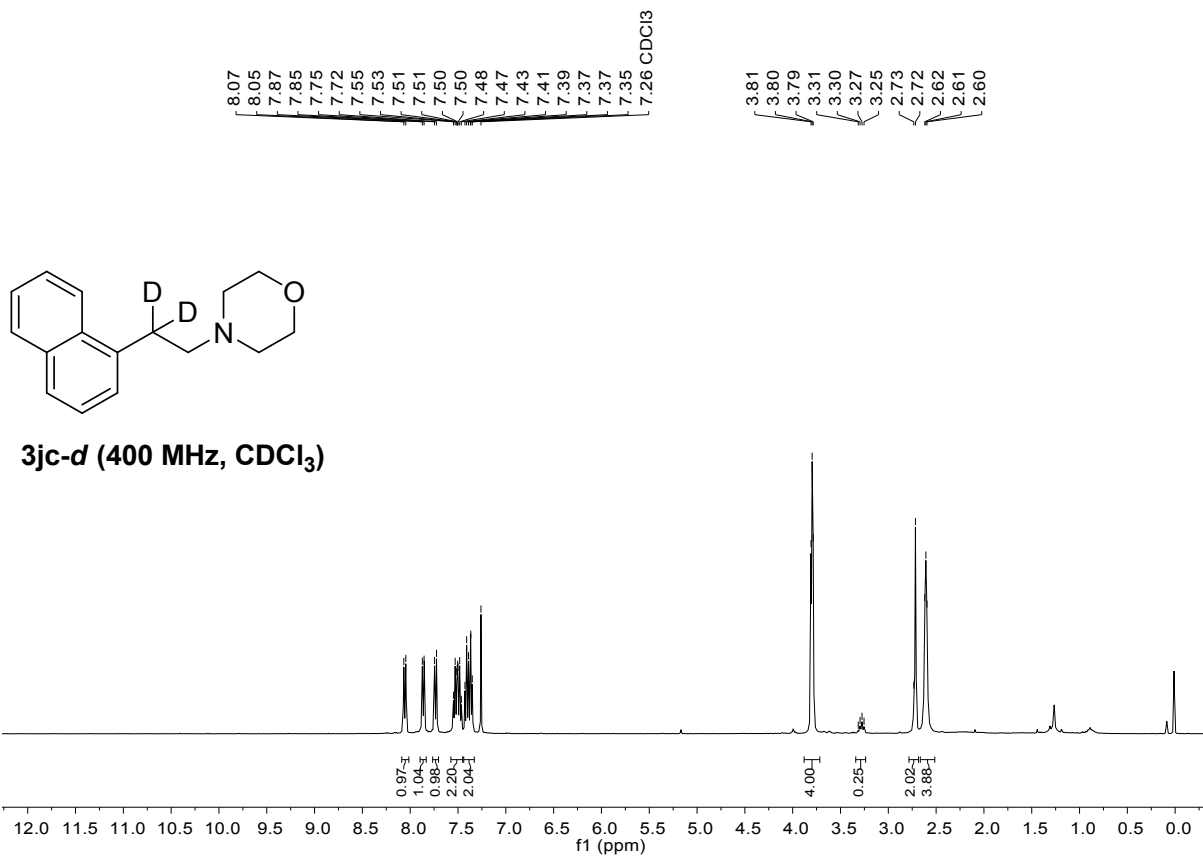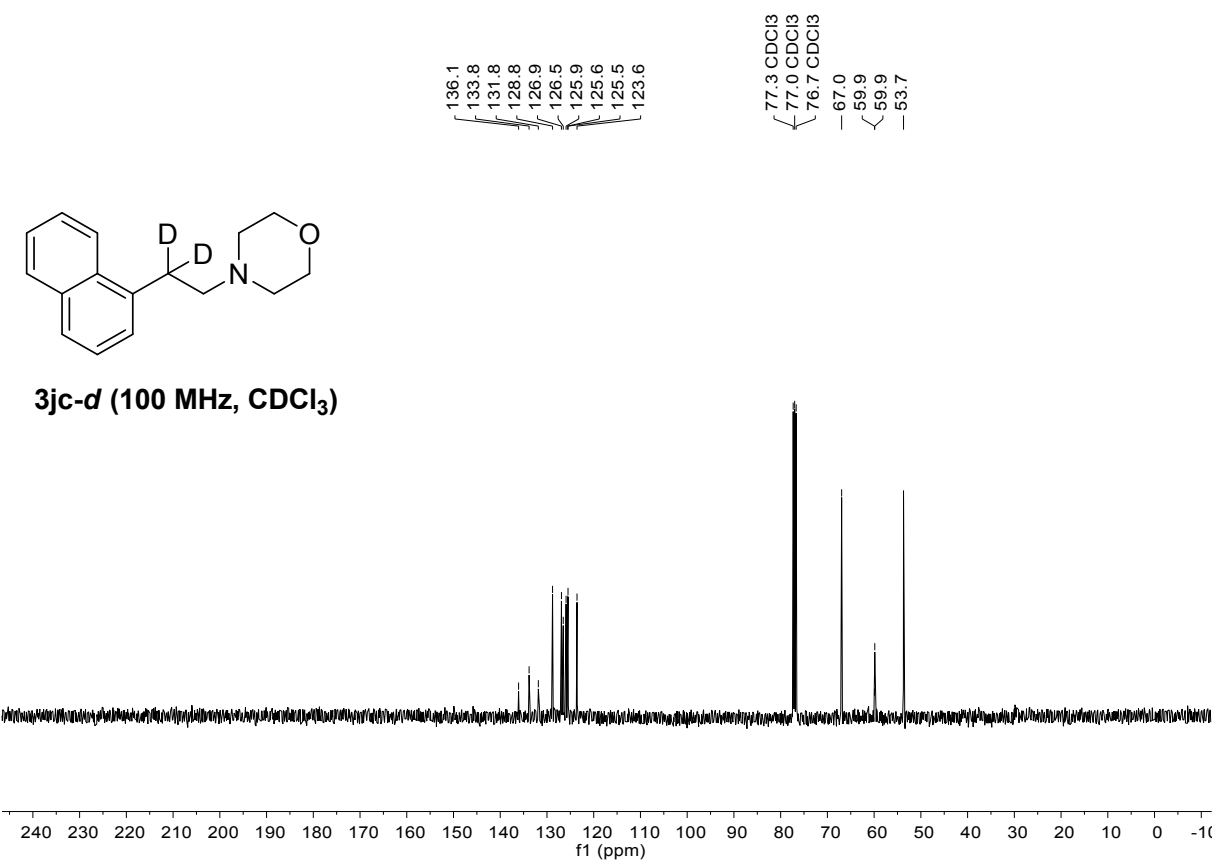

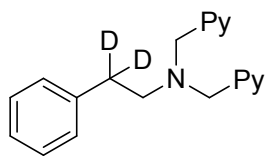

**3ai-d (400 MHz, CDCl<sub>3</sub>)**

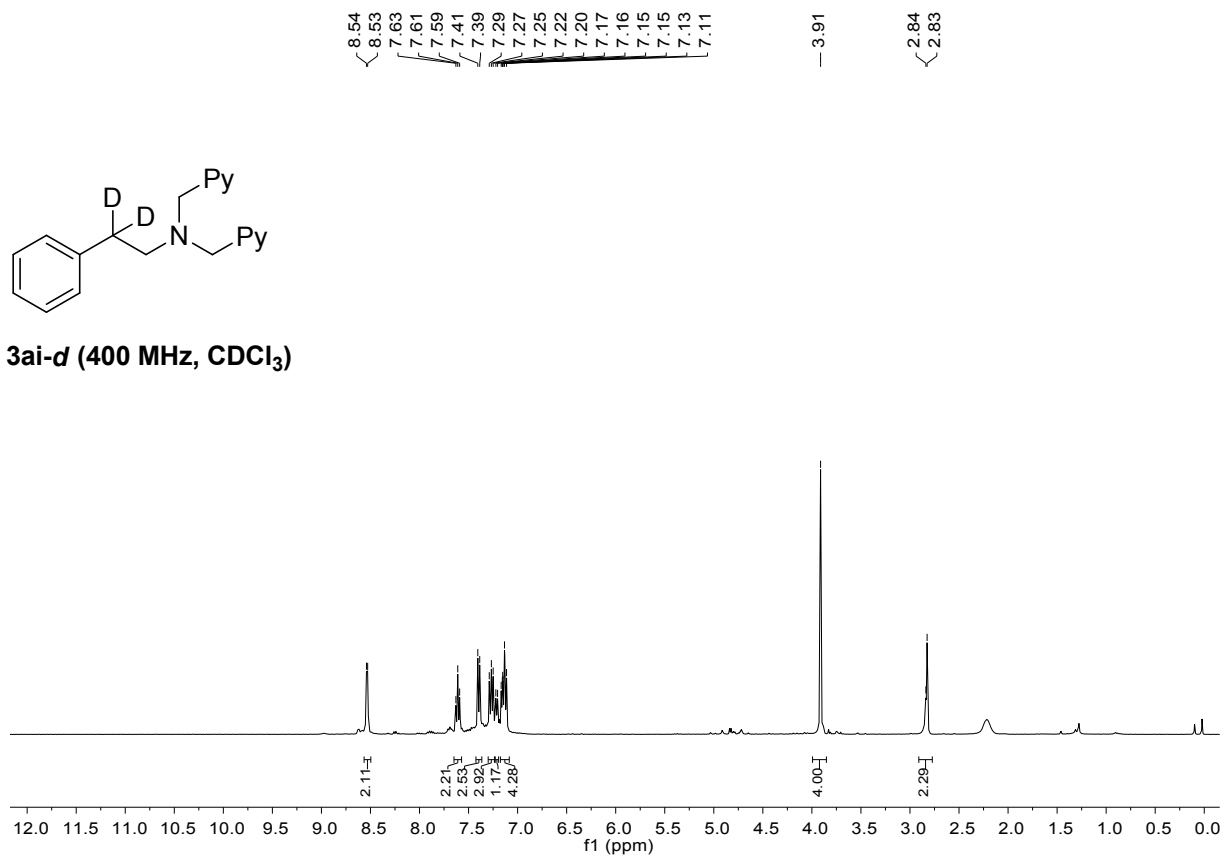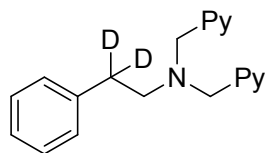

**3ai-d (100 MHz, CDCl<sub>3</sub>)**

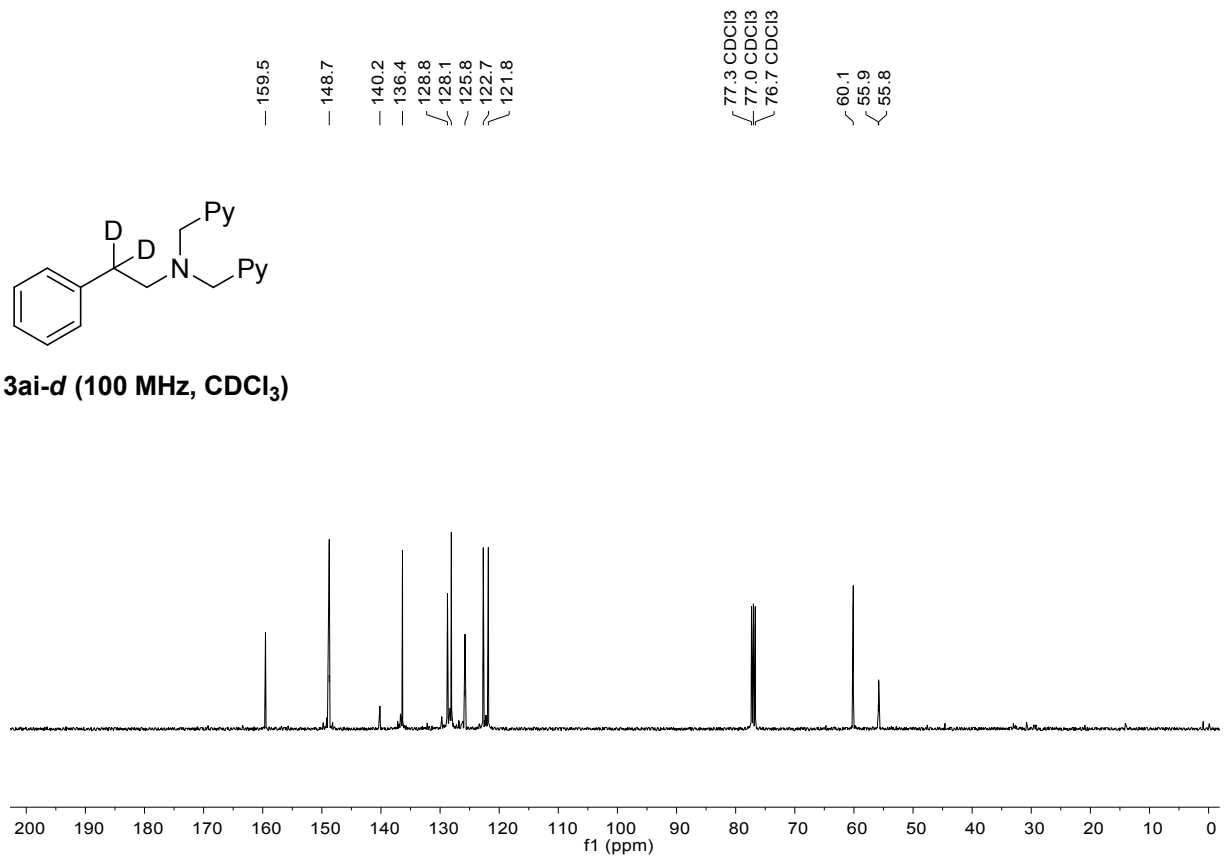

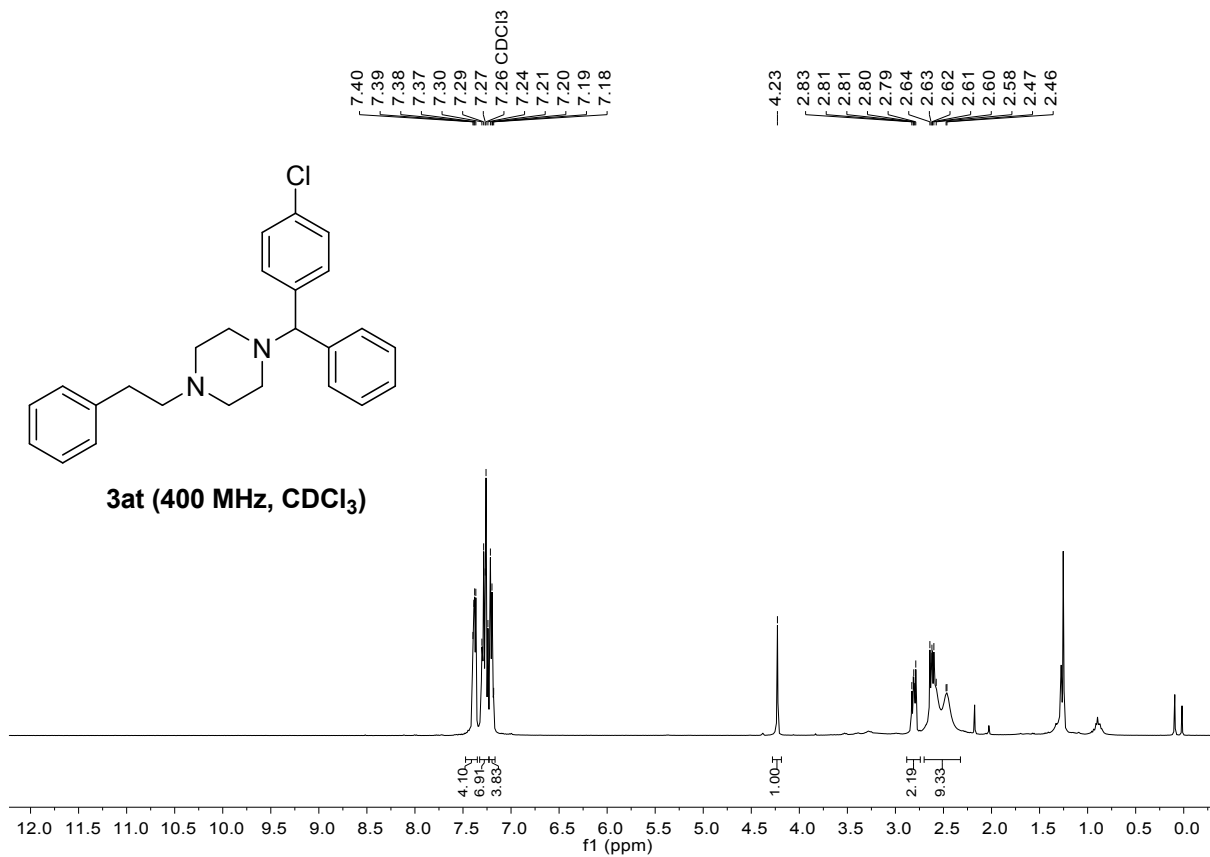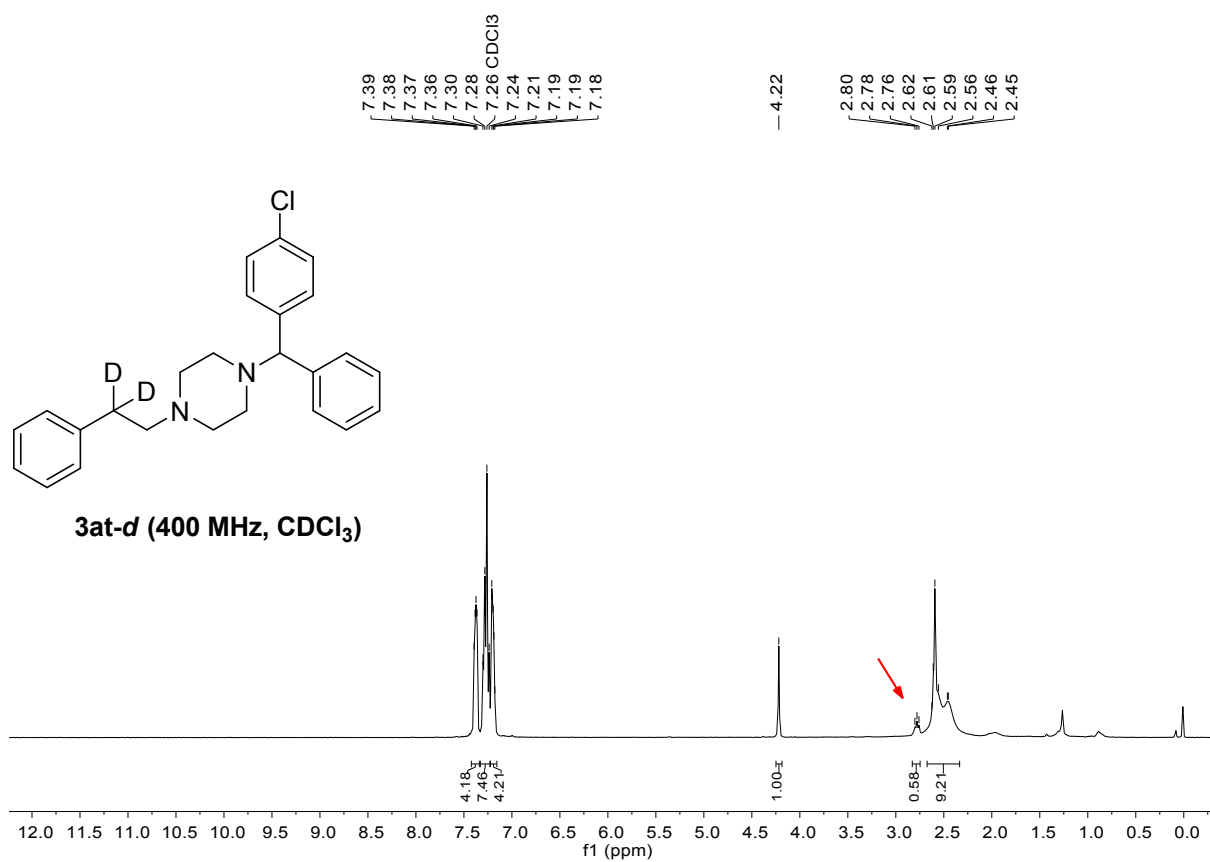

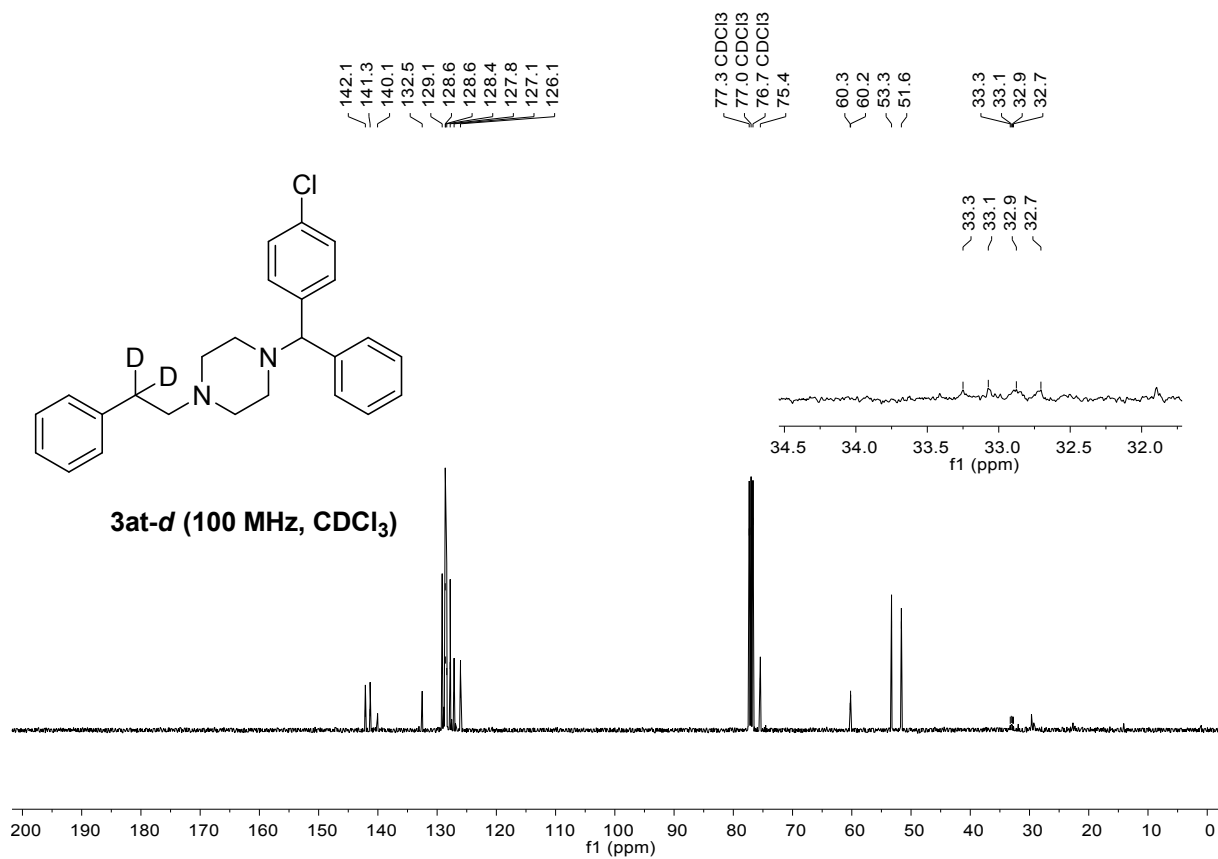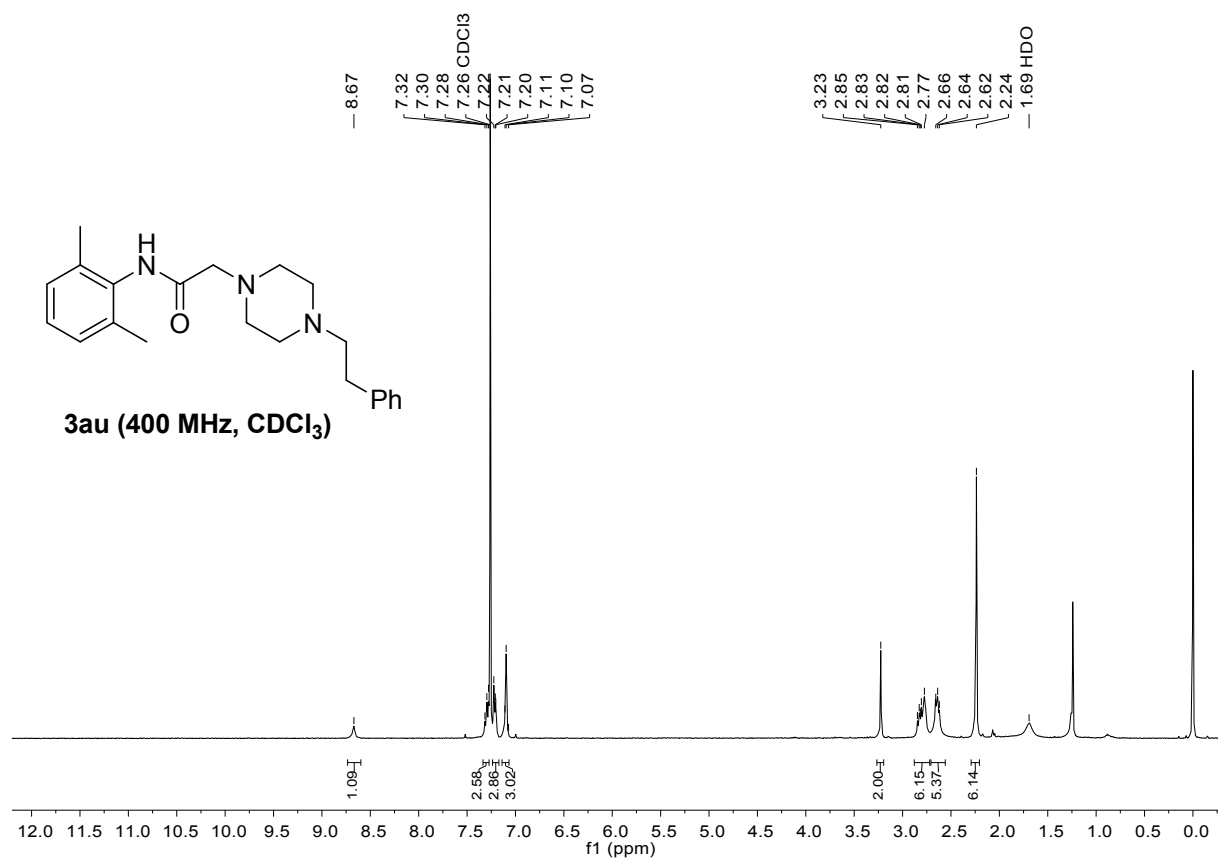



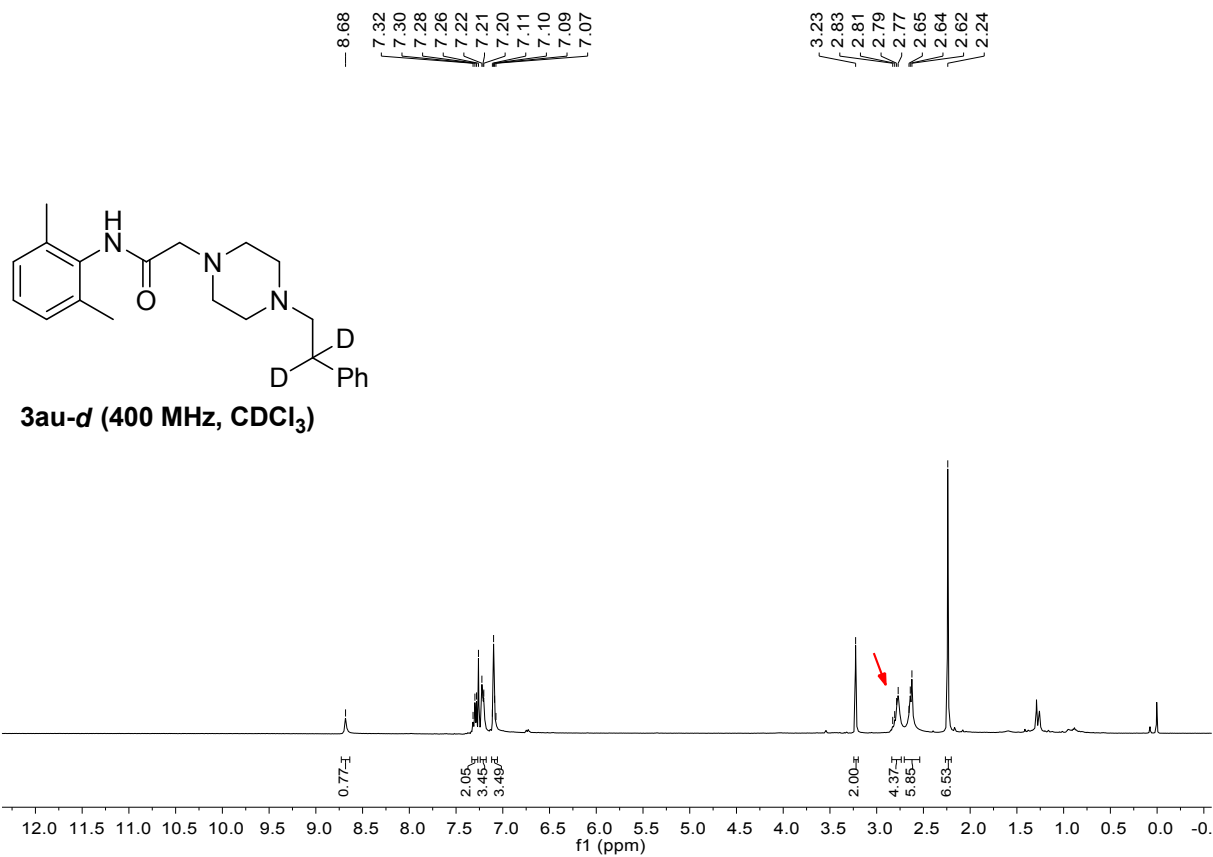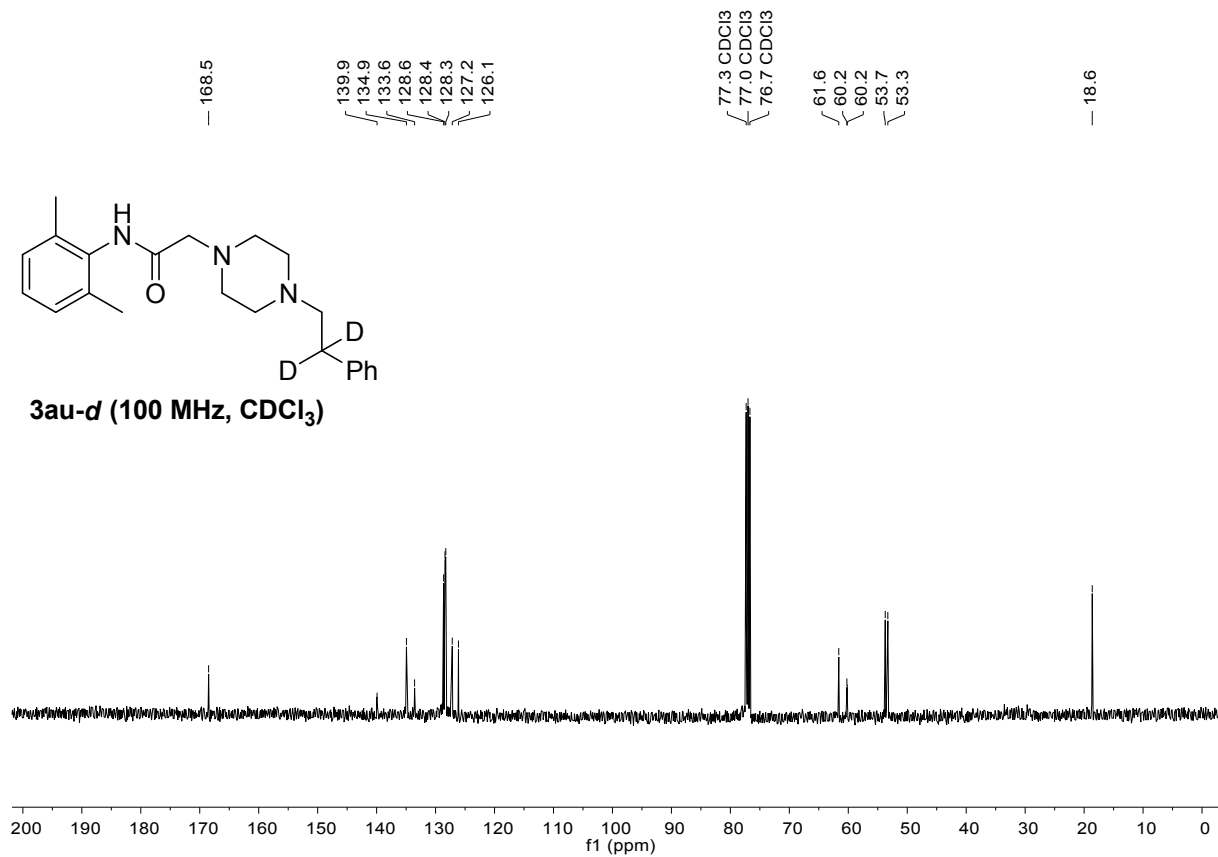

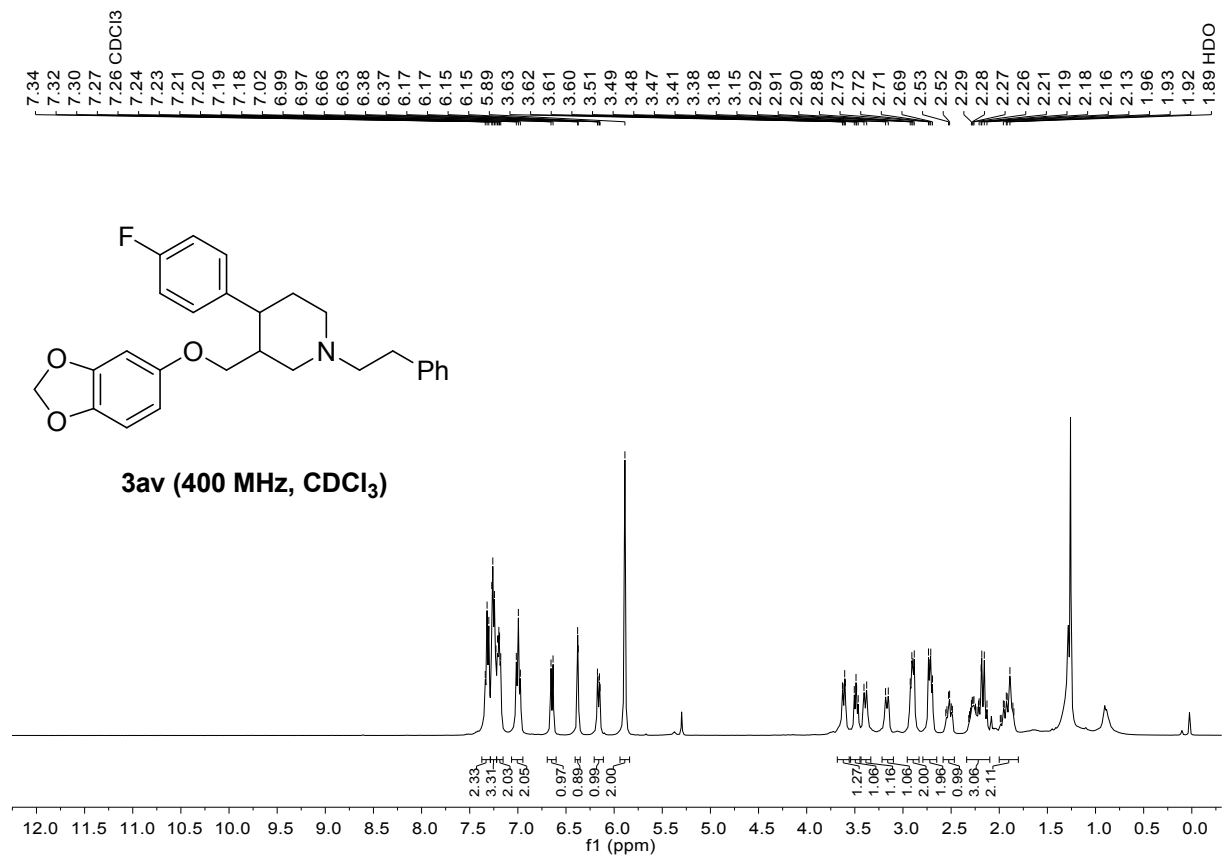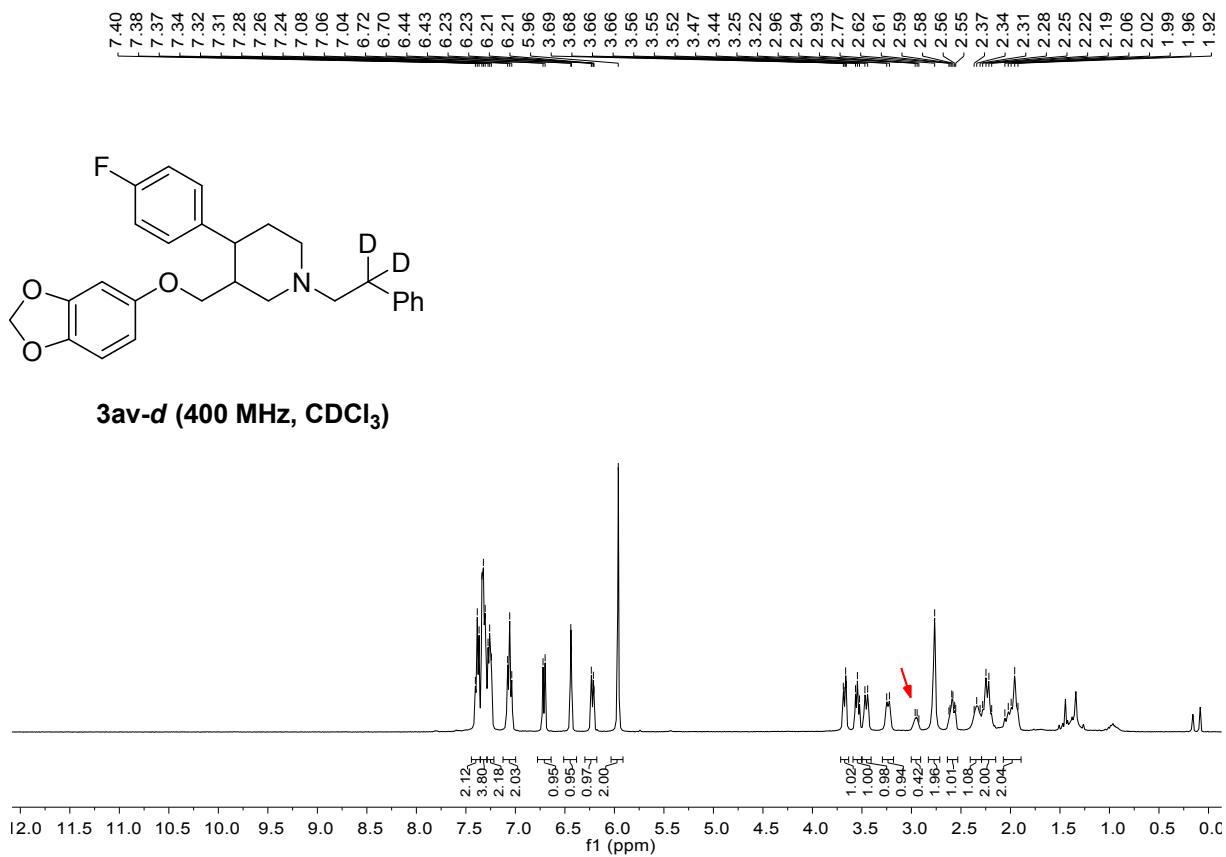

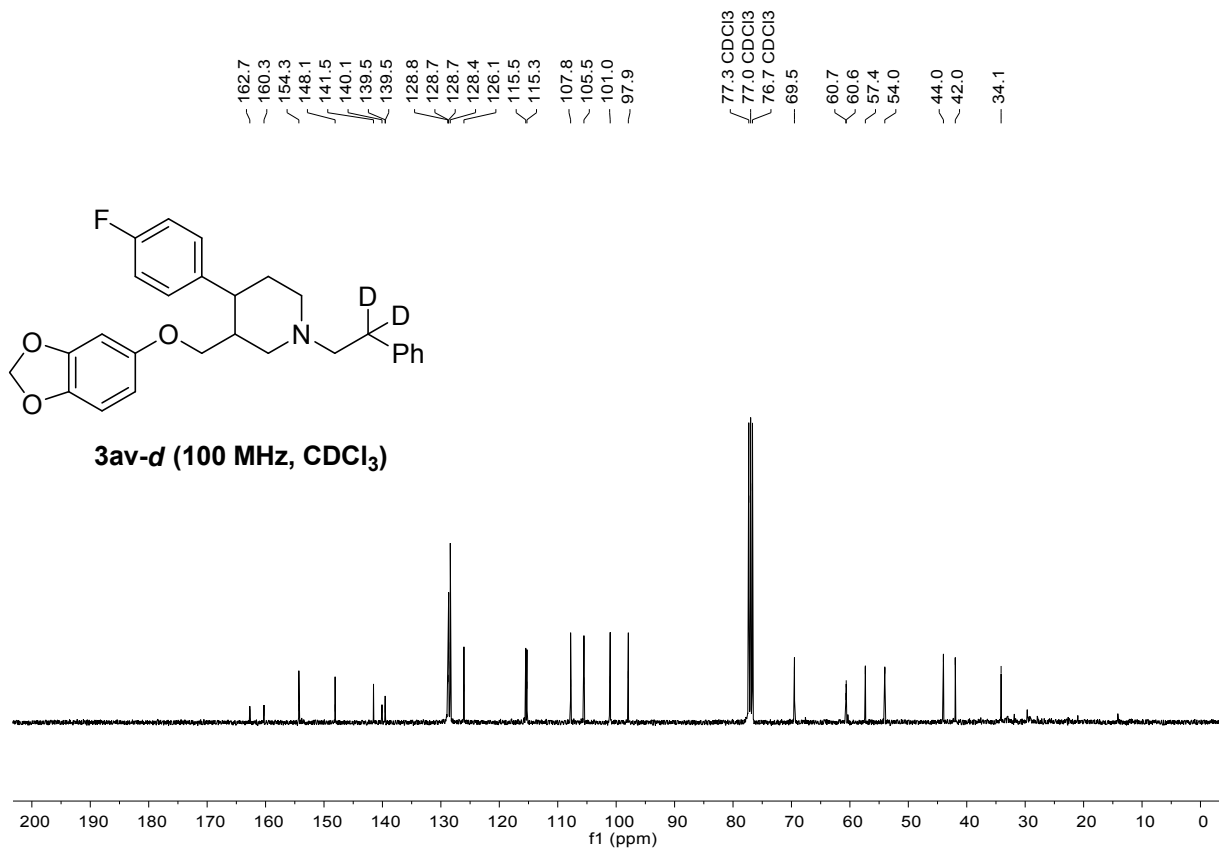

Supplement: d1ob00316j1.pdf [file d1ob00316j1.pdf]
